# Supplementary material for: Effects of two contrasting biochars on gaseous nitrogen emissions andintensity in intensive vegetable soils across mainland China
Source: Copernicus journal article supplement (doi:10.5194/bg-2016-487), 2016-12-15
Supplement: Supplementary file 1 [file bg-2016-487-supplement.pdf]

1 **Table S1**

2 Characteristics of the vegetable soils and biochars used in the experiment.

| Item                                                   | Vegetable soil |                        |                   |                   | Biochar |       |
|--------------------------------------------------------|----------------|------------------------|-------------------|-------------------|---------|-------|
|                                                        | HN             | SX                     | SD                | HLJ               | Bw      | Bm    |
| Texture                                                | sandy loam     | silt (sandy) clay loam | silt (sandy) loam | silt (sandy) loam |         |       |
| sand, %                                                | 47.1           | 17.7                   | 24.7              | 31.6              |         |       |
| silt, %                                                | 40.0           | 59.6                   | 60.4              | 52.8              |         |       |
| clay, %                                                | 12.9           | 22.7                   | 14.9              | 15.6              |         |       |
| total C (g kg <sup>-1</sup> )                          | 7.6            | 9.8                    | 8.2               | 26.8              | 449.1   | 461.2 |
| total N (g kg <sup>-1</sup> )                          | 1.2            | 1.4                    | 1.0               | 2.1               | 6.5     | 12.0  |
| C/N                                                    | 6.3            | 7.0                    | 8.2               | 12.8              | 69.1    | 38.4  |
| pH                                                     | 5.6            | 7.6                    | 8.2               | 7.6               | 9.7     | 10.0  |
| EC (ds m <sup>-1</sup> )                               | 1.8            | 1.1                    | 0.2               | 0.2               | 10.6    | 3.3   |
| DOC (g kg <sup>-1</sup> )                              | 0.5            | 0.4                    | 0.2               | 0.7               | 0.9     | 1.3   |
| CEC, cmol kg <sup>-1</sup>                             | 6.1            | 13.2                   | 15.3              | 20.3              | 22.1    | 22.7  |
| WHC, %                                                 | 41.6           | 50.1                   | 54.4              | 59.6              | 362.0   | 304.1 |
| NH <sub>4</sub> <sup>+</sup> -N (mg kg <sup>-1</sup> ) | 105.3          | 32.2                   | 28.4              | 31.6              | 4.3     | 4.0   |
| NO <sub>3</sub> <sup>-</sup> -N (mg kg <sup>-1</sup> ) | 415.8          | 307.6                  | 21.2              | 30.8              | 6.1     | 3.2   |
| Bulk density (g cm <sup>-3</sup> )                     | 1.2            | 1.4                    | 1.1               | 1.1               |         |       |
| Surface area (m <sup>2</sup> g <sup>-1</sup> )         |                |                        |                   |                   | 21.3    | 9.3   |
| Ash content, %                                         |                |                        |                   |                   | 29.1    | 38.6  |

3 EC: electronic conductivity; DOC: dissolved organic carbon; CEC: cation exchange capacity; WHC: water holding capacity

4 **Table S2**

5 Crop rotation, tillage practices, and fertilizer application from April 2015 to April 2016.

| Crop                  | Date       | Agricultural activity               | Fertilizer N rate (kg N ha <sup>-1</sup> ) | Fertilizer P rate (kg N ha <sup>-1</sup> ) | Fertilizer K rate (kg N ha <sup>-1</sup> ) |
|-----------------------|------------|-------------------------------------|--------------------------------------------|--------------------------------------------|--------------------------------------------|
| Amaranth <sub>1</sub> | 04/22/2015 | Tillage                             |                                            |                                            |                                            |
|                       | 04/29/2015 | Fertilizer application and planting | 240                                        | 240                                        | 240                                        |
|                       | 06/13/2015 | Harvesting                          |                                            |                                            |                                            |
|                       | 06/14/2015 | Tillage                             |                                            |                                            |                                            |
| Amaranth <sub>2</sub> | 06/19/2015 | Fertilizer application and planting | 0                                          | 0                                          | 0                                          |
|                       | 07/31/2015 | Harvesting                          |                                            |                                            |                                            |
|                       | 07/32/2015 | Tillage                             |                                            |                                            |                                            |
| Tung choy             | 08/20/2015 | Fertilizer application and planting | 200                                        | 200                                        | 200                                        |
|                       | 11/27/2015 | Harvesting                          |                                            |                                            |                                            |
|                       | 11/28/2015 | Tillage                             |                                            |                                            |                                            |
| Spinach               | 12/06/2015 | Fertilizer application and planting | 150                                        | 150                                        | 150                                        |
|                       | 01/28/2016 | Harvesting                          |                                            |                                            |                                            |
|                       | 01/09/2016 | Tillage                             |                                            |                                            |                                            |
| Coriander herb        | 02/28/2016 | Fertilizer application and planting | 180                                        | 180                                        | 180                                        |
|                       | 04/29/2016 | Harvesting                          |                                            |                                            |                                            |
|                       | 04/30/2016 | Tillage                             |                                            |                                            |                                            |

6 **Supplementary information**

7 **Fig. S1** Map showing the sampling sites in China.

8 **Fig. S2** Dynamics of water filled pore space (WFPS), air temperature and soil temperature during the  
9 vegetable cultivation period.

10 **Fig. S3** Scanning electron microscope (SEM) images of the biochars derived from Bw (a, b and c) and  
11 Bm (d, e and f). Same magnification for a and d ( $\times 50$ ), b and e ( $\times 400$ ) and c and f ( $\times 2000$ ).

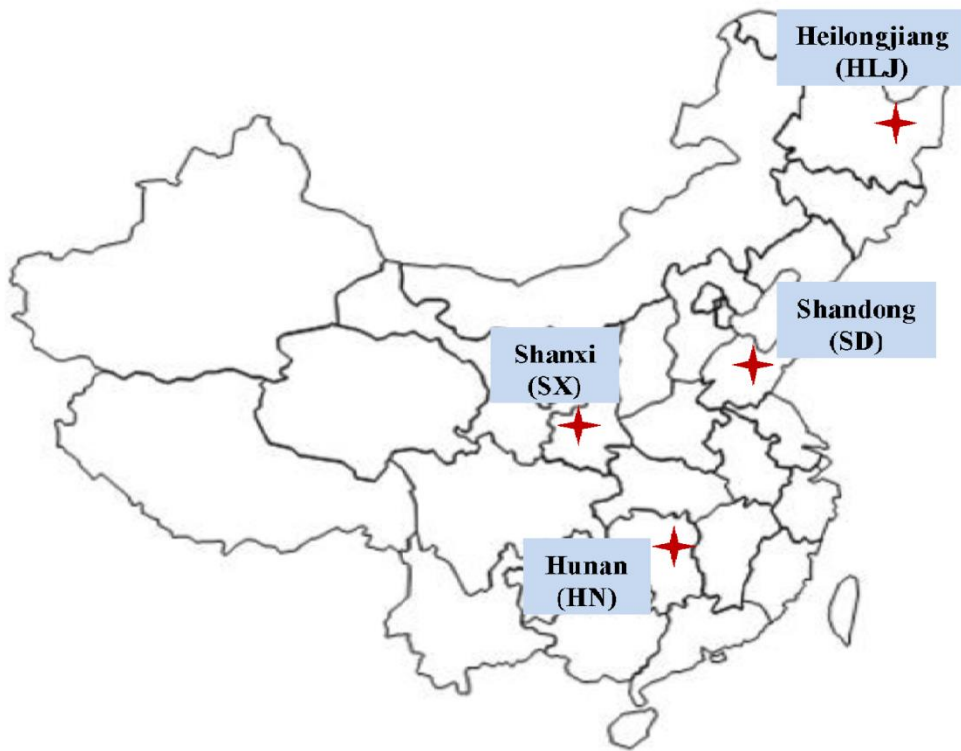

12

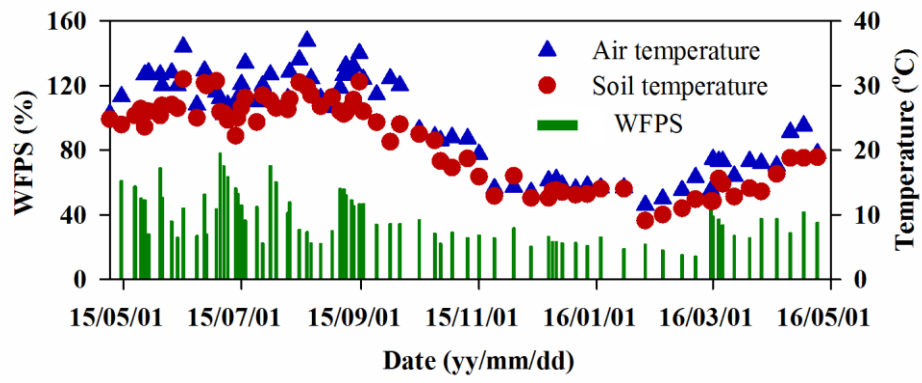

13

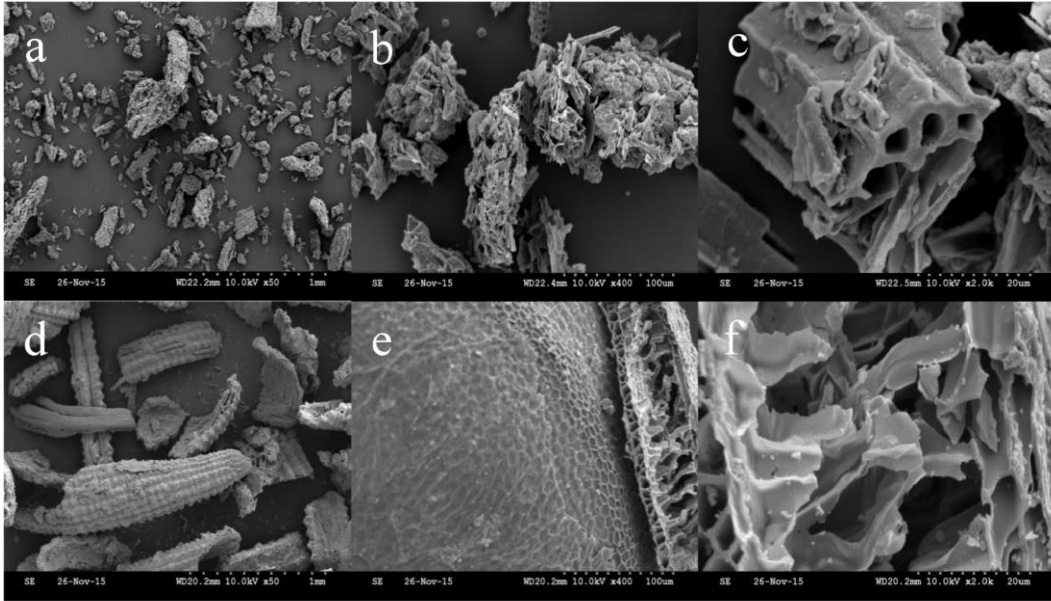

14
