# Supplementary material for: Effects of two contrasting biochars on gaseous nitrogen emissions andintensity in intensive vegetable soils across mainland China
Source: Copernicus journal article supplement (doi:10.5194/bg-2016-487), 2016-12-15
Supplement: Supplementary file [file bg-2016-487-AC3-supplement.pdf]

1           **Biochar can decrease the gaseous reactive nitrogen intensity in**  
2                   **intensive vegetable soils across mainland China**

3                                   Changhua Fan, Hao Chen, Bo Li, Zhengqin Xiong\*

4    Jiangsu Key Laboratory of Low Carbon Agriculture and GHGs Mitigation, College of Resources and Environmental  
5    Sciences, Nanjing Agricultural University, Nanjing 210095, China

6    \*Corresponding author (Z. Xiong): E-mail: zqxiong@njau.edu.cn;

7    Tel: +86-25-84395148; Fax: +86-25-84395210

1 **Highlights**

- 2 1. Two contrasting biochars affected GNrI across 4 major vegetable soils in China.
- 3 2. Biochar affects gaseous Nr or yield largely depending on soil types.
- 4 3. Both biochars decreased GNrI with Bw mitigated gaseous Nr whereas Bm improved yield.

1 **Abstract**

2 Biochar amendment to soil has been proposed as a strategy for sequestering carbon, mitigating climate change and  
3 enhancing crop productivity, but few studies have demonstrated the general effects of different feedstock-derived  
4 biochars on the various gaseous reactive nitrogen emissions (GNrEs, N<sub>2</sub>O, NO and NH<sub>3</sub>) simultaneously across the  
5 typical vegetable soils in China. A greenhouse pot experiment with five consecutive vegetable crops was conducted to  
6 investigate the effects of two contrasting biochar, namely, wheat straw biochar (Bw) and swine manure biochar (Bm) on  
7 GNrEs, vegetable yield and gaseous reactive nitrogen intensity (GNrI) in four typical vegetable soils from Hunan  
8 province (HN), Shanxi province (SX), Shandong province (SD) and Heilongjiang province (HLJ) which are  
9 representative of the intensive vegetable ecosystems across mainland China. Results showed that remarkable GNrE  
10 mitigation induced by biochar occurred in SX and HLJ soils, whereas enhancement of yield occurred in SD and HLJ  
11 soils. Additionally, both biochars decreased GNrI with Bw performed better than Bm regarding N<sub>2</sub>O mitigation, with  
12 Bw mitigating N<sub>2</sub>O and NO emissions by 21.8–59.1 % and 37.0–49.5 % (except for SD), respectively, while Bm  
13 improved yield by 13.5–30.5 % (except for HN and SX). Biochar amendments generally stimulated the NH<sub>3</sub> emissions  
14 with greater enhancement from Bm than Bw. We can infer that the biochar's effects on the GNrEs and vegetable yield  
15 strongly depend on the attributes of the soil and biochar. Therefore, both soil type and biochar characteristics should be  
16 seriously considered before conducting large-scale application of biochar in order to achieve the maximum benefits under  
17 intensive greenhouse vegetable agriculture.

18 **Keyword:** Biochar, Intensive vegetable soil, Gaseous reactive nitrogen emissions (GNrEs), Gaseous reactive  
19 nitrogen intensity (GNrI)

# 1 **1 Introduction**

2 Agriculture accounted for an estimated emission of 4.1 (1.7–4.8) Tg N yr<sup>-1</sup> for N<sub>2</sub>O and 3.7 Tg N yr<sup>-1</sup> for NO,  
3 contributing 60 % and 10 %, respectively, to the total global anthropogenic emissions, largely due to increases of N  
4 fertilizer application in cropland (Ciais, 2013). The concentration of atmospheric N<sub>2</sub>O, a powerful, long-lived,  
5 greenhouse gas, has increased from 270 parts per billion by volume (ppbv) in the pre-industrial era to ~ 324 ppbv (Ussiri  
6 and Lal, 2013); it has 265 times the global warming potential (GWP) of CO<sub>2</sub> on a 100-year horizon (IPCC, 2013) and  
7 also causes depletion of the ozone layer in the atmosphere (Ravishankara et al., 2009). In contrast, NO<sub>x</sub>, which is mainly  
8 emitted as nitric oxide (NO), does not directly affect the earth's radiative balance but catalyzes the production of  
9 tropospheric ozone (O<sub>3</sub>), which is a greenhouse gas associated with detrimental effects on human health (Anenberg et al.,  
10 2012) and crop production (Avnery et al., 2011). Additionally, along with the high nitrogen (N) application, ammonia  
11 volatilization is one of the major N loss pathways (Harrison and Webb, 2001) as well, with up to 90% coming from  
12 agricultural activities (Misselbrook et al., 2000; Boyer et al., 2002). As a natural component and a dominant atmospheric  
13 alkaline gas, NH<sub>3</sub> plays an important role in atmospheric chemistry and ambient aerosol formation (Langridge et al.,  
14 2012; Wang et al., 2015b). In addition to nutrient enrichment (eutrophication) of terrestrial and aquatic systems and  
15 global acidification of precipitation, NH<sub>3</sub> has also been shown to be a major factor in the formation of atmospheric  
16 particulate matter and secondary aerosols (Kim et al., 2006; Pinder et al., 2007), leading to potentially adverse effects on  
17 human and ecosystem health such as visibility degradation and threats to biodiversity (Powelson et al., 2008; Behera et al.,  
18 2013). Consequently, the release of various reactive N species results in lower N use efficiency in agricultural systems.

19 In China, vegetable production devotes an area of approximately  $24.7 \times 10^6$  ha, equivalent to 12.4% of the total  
20 available cropping area, and the production represented 52 % of the world vegetable production in 2012 (FAO, 2015).  
21 Intensified vegetable cultivation in China is characterized by high N application rates, high cropping index and frequent  
22 farm practices. Annual nitrogen fertilizer inputs for intensively managed vegetable cultivation in rapidly developing areas  
23 are 3–6 times higher than in cereal grain cultivation in China (Ju et al., 2006; Diao et al., 2013; Wang et al., 2015a). As a  
24 result, great concern exists about excess N fertilizer application, leading to low use efficiency in intensive vegetable  
25 fields in China (Deng et al., 2013; Diao et al., 2013). Meanwhile, intensive vegetable agriculture is considered to be an  
26 important source of N<sub>2</sub>O (Xiong et al., 2006; Jia et al., 2012; Li et al., 2015b; Zhang et al., 2015) and NO production  
27 (Mei et al., 2009). Moreover, ammonia volatilization is another important N pathway in fertilized soil, resulting in large  
28 losses of soil-plant N (Pacholski et al., 2008; Zhang et al., 2011). Therefore, the reduction of reactive N loss becomes a  
29 central environmental challenge to meet the joint challenges of high production and acceptable environmental  
30 consequences in intensive vegetable production (Zhang et al., 2013).

1 Biochar is the dark-colored, carbon (C)-rich residue of pyrolysis or gasification of plant biomass under oxygen  
2 ( $O_2$ )-limited conditions, specifically produced for use as a soil amendment (Sohi, 2012). The amendment of agricultural  
3 ecosystems with biochar has been proposed as an effective countermeasure for climate change (Smith, 2016). These  
4 additions would increase soil carbon storage (Mukherjee and Zimmerman, 2013; Stavi and Lal, 2013), decrease GHG  
5 emissions (Li et al., 2016), and improve soil fertility and crop production (Major et al., 2010; Liu et al., 2013). However,  
6 some recent studies have reported no difference or even an increase in soil  $N_2O$  emissions induced by biochar application  
7 from different soils (Saarnio et al., 2013; Wang et al., 2015a). Still,  $NH_3$  volatilization was enhanced by biochar  
8 application in pasture soil (Clough et al., 2010), vegetable soil (Sun et al., 2014) and paddy soil in the wheat-growing  
9 season (Zhao et al., 2014). Additionally, crop productivity responses to biochar amendments differed among various  
10 biochars (Cayuela et al., 2014). These inconsistent results suggest that current biochar application to soil is not a  
11 “one-size fit-all paradigm” because of the variation in the physical and chemical characteristics of the different biochars,  
12 soil types and crop species (Field et al., 2013; Cayuela et al., 2014). Moreover, limited types of biochar (Spokas and  
13 Reicosky, 2009) and soil (Sun et al., 2014) were involved in the experiments in previous studies. Thus, the evaluation of  
14 the different types of biochar under the typical soils is imperative to gain a comprehensive understanding of potential  
15 interactions before the large-scale application of biochars in intensive vegetable cropping system in China.

16 Therefore, a greenhouse pot experiment was conducted in an effort to investigate the effects of different types of  
17 biochar on gaseous reactive nitrogen emissions (GNrEs), namely,  $N_2O$ ,  $NO$  and  $NH_3$ , simultaneously in four typical  
18 intensified vegetable soils across main vegetable production areas of mainland China. Overall, the objectives of this  
19 research were to gain a comprehensive insight into the effects of the different types of biochar on the GNrEs, vegetable  
20 yield and gaseous reactive nitrogen intensity (GNrI) in intensively managed vegetable production in China.

## 1 **2 Materials and methods**

### 2 *2.1. Experimental soil and biochar*

3 Four typical greenhouse vegetable cultivation sites with a long history (more than 10 years) of conventional  
4 cultivation were selected from Northeast, Northwest, Central and Eastern China (Fig. S1), namely, Phaeozem, Anthrosol,  
5 Acrisol and Cambisol (FAO and ISRIC, 2012) from Jiamusi (46°48' N, 130°12' E), Heilongjiang province (HLJ);  
6 Yangling (34°18' N, 108°2' E), Shanxi province (SX); Changsha (28°32' N, 113°23' E), Hunan province (HN) and  
7 Shouguang (36°56' N, 118°38' E), Shandong province (SD), respectively were collected and represented a range of  
8 differences in physicochemical properties and regions (Table S1). Soil samples were manually collected from the  
9 cultivated layer (0–20 cm) after the local vegetable harvest in April, 2015. The samples were air-dried and passed through  
10 a 5 mm stainless steel mesh sieve and homogenized thoroughly. Any visible roots and organic residues were removed  
11 manually before being packed with the necessary amount of soil to achieve the initial field bulk density. Each pot  
12 received 15 kg of 105 °C dry-weight-equivalent fresh soil. For each of the biochar amendment pot, 282.6 g pot<sup>-1</sup> sieved  
13 biochar (2 mm) was mixed with the soil thoroughly before the experiment, which was equivalent to a 40 t ha<sup>-1</sup> biochar  
14 dose (dry weight). No more biochar was added later in the experimental period.

15 Two types of biochar, derived from two common agricultural wastes in China: wheat straw and swine manure,  
16 hereafter referred to as Bw and Bm, respectively (Table S1). The Bw was produced at the Sanli New Energy Company in  
17 Henan, China, by pyrolysis and thermal decomposition at 400–500 °C. The Bm was produced through thermal  
18 decomposition at 400 °C by the State Key Laboratory of Soil Science and Sustainable Agricultural, Institute of Soil  
19 Science, Chinese Academy of Sciences. In accordance with Lu (2000), the SOC was measured by wet digestion with  
20 H<sub>2</sub>SO<sub>4</sub>–K<sub>2</sub>Cr<sub>2</sub>O<sub>7</sub>, TN was determined by semi-micro Kjeldahl digestion, and soil texture was determined with the pipette  
21 method. The soil pH and biochar pH were measured in deionized water at a volume ratio of 1:2.5 (soil to water) with a  
22 PHS-3C mv/pH detector (Shanghai Kangyi Inc. China). Biochar content of hydrogen (H) was measured by elemental  
23 analysis after dry combustion (Euro EA, Hekatech GmbH, Wegberg, Germany). The oxygen content of biochar was  
24 measured with the same device after pyrolysis of the sample at 1000 °C followed by reduction of the evolved O<sub>2</sub> to CO  
25 and quantification by GC-TCD. The soil NO<sub>3</sub><sup>-</sup>-N and NH<sub>4</sub><sup>+</sup>-N were measured following the two-wavelength ultraviolet  
26 spectrometry and indophenol blue methods, respectively, using an ultraviolet spectrophotometer (HITACHI, UV-2900,  
27 Tokyo, Japan). Electric conductivity (EC) was measured by using a Mettler-Toledo instrument (FE30-K, Shanghai, China)  
28 at a 1:5 (w:v) soil to water ratio. Cation exchange capacity (CEC) was determined using the CH<sub>3</sub>COONH<sub>4</sub> method.  
29 Dissolved organic carbon (DOC) was extracted from 5 g of the biochar/soil with an addition of 50 ml deionized water  
30 and measured by a TOC analyzer (TOC-2000/3000, Metash Instruments Co., LTD, Shanghai, China). Ash content was

1 measured by heating the biochars at 750 °C for 4 h. The specific surface area of the biochar material was tested using the  
2 Brunauer–Emmett–Teller (BET) method, from which the N adsorption–desorption isotherms at 77 K were measured by  
3 an automated gas adsorption analyzer ASAP2000 (Micromeritics, Norcross, GA) with + 5% accuracy. Scanning electron  
4 microscopy (SEM) imaging analysis was conducted using a HITACHI S-3000N scanning electron microscope.

## 5 2.2. *Experimental set-up and management*

6 The pot experiments were performed at the greenhouse experimental station of Nanjing Agricultural University,  
7 China. Five vegetable crops were grown successively in the four vegetable soils during the experimental period. For each  
8 type of soil, three treatments with three replicates were arranged in a random design: urea without biochar (N), urea with  
9 wheat straw biochar (N+Bw), urea with swine manure biochar (N+Bm). In addition, phosphate and potassium fertilizers  
10 in the form of calcium magnesium phosphate and potassium chloride, together with urea, were broadcasted and mixed  
11 with soil thoroughly prior to sowing the vegetables. No topdressing events occurred because of the frequent cultivation  
12 and short growth period for the leafy vegetables. Based on the vegetable growth, all pots received equal amounts of water  
13 and no precipitation. Detailed information on the pot management practices is provided in Table S2.

14 Each pot consists of a 30 cm × 30 cm (height × diameter) cylinder made of polyvinyl chloride (PVC). The top of  
15 each pot was surrounded by a special water-filled trough collar, which allowed a chamber to sit on the pot and prevent  
16 gas exchange during the gas-sampling period. Small holes (diameter of 1 cm) at the bottom of the pots were designed for  
17 drainage. To prevent soil loss, a fine nylon mesh (< 0.5 mm) was attached to the base of the soil cores before packing.

## 18 2.3. *Measurement of N<sub>2</sub>O, NO and NH<sub>3</sub>*

19 The NO and N<sub>2</sub>O fluxes were measured simultaneously from each vegetable cultivation using a static opaque  
20 chamber method (Zheng et al., 2008; Yao et al., 2009). A square PVC chamber of 35 cm × 35 cm × 40 cm (length ×  
21 width × height) was temporarily mounted on the pot for gas flux measurement. The chamber was coated with sponge and  
22 aluminum foil outside to prevent solar radiation heating the chamber. Gas samples for flux measurements were collected  
23 between 8 and 10 a.m. on each measuring day to minimize the influence of diurnal temperature variation. Gas fluxes  
24 were usually measured once a week and every other day for one week following fertilizer application. To measure the  
25 N<sub>2</sub>O flux, four samples were collected from the headspace chamber using 20 ml polypropylene syringes at 0, 10, 20, and  
26 30 min after chamber closure. The gas concentrations in the samples were analyzed within 12 h after sampling using an  
27 Agilent 7890A gas chromatograph equipped with an electron capture detector (ECD) for N<sub>2</sub>O detection. The carrier gas  
28 was argon-methane (50 %) at a flow rate of 40 ml min<sup>-1</sup>. The column and ECD temperatures were maintained at 40 and  
29 300 °C, respectively. The gas chromatography configurations described by Wang et al. (2013) were adopted for the gas  
30 concentration analysis. N<sub>2</sub>O flux was calculated using the linear increases in gas concentration with time. Sample sets

1 were rejected unless they yielded a linear regression value of  $R^2 > 0.90$ .

2 For each NO flux measurement, gas samples were collected from the same chamber that was used for the N<sub>2</sub>O flux  
3 measurements (Yao et al., 2009). Before closing the chamber, an approximately 1.0 L gas sample from the headspace of  
4 each chamber was extracted into an evacuated sampling bag (Delin Gas Packing Co., LTD, Dalian, China), and this  
5 measurement was regarded as time 0 min for NO analysis. After 30 min under chamber enclosure conditions (i.e., after  
6 the N<sub>2</sub>O sample collections were completed), another headspace gas sample with the same volume was extracted from  
7 each chamber into another evacuated bag. Within 1 h after sampling, NO concentrations were analyzed by a model 42i  
8 chemiluminescence NO–NO–NO<sub>x</sub> analyzer (Thermo Environmental Instruments Inc., Franklin, MA, USA). The NO  
9 fluxes were derived from the concentration differences between the two collected samples. The NO<sub>x</sub> analyzer was  
10 calibrated by a model 146i dynamic dilution calibrator system at the end of each crop-growing season.

11 The mean flux of N<sub>2</sub>O or NO during the experiment period was calculated as the average of all measured fluxes,  
12 which were weighted by the interval between the two measurements (Xiong et al., 2006). The cumulative N<sub>2</sub>O was  
13 calculated as the product of the mean flux and the entire duration.

14 The NH<sub>3</sub> volatilization was determined using the ventilation method (Zhao et al., 2010). The  
15 phosphoglycerol-soaked sponge was replaced every day after each fertilization event for approximately one week. The  
16 phosphoglycerol-soaked sponges used to collect the NH<sub>3</sub> samples were immediately extracted with 300 mL potassium  
17 chloride (KCl) solution (1 mol L<sup>-1</sup>) for 1 h. The concentration of ammonia nitrogen (NH<sub>4</sub><sup>+</sup>-N) was measured using the  
18 indophenol blue method at 625 nm (Sororzano, 1969) by ultraviolet spectrophotometry (HITACHI, UV-2900, Tokyo,  
19 Japan, with 0.005 absorbance of photometric accuracy). The cumulative seasonal NH<sub>3</sub> volatilization was the sum of the  
20 daily emissions during the measurement period.

#### 21 *2.4. Auxiliary measurements*

22 Simultaneously with the determination of trace gas fluxes, the air temperature and the soil temperature at a depth of  
23 5 cm were measured using thermally sensitive probes at each sampling date. Soil water content was also measured using  
24 a portable water detector (Mode TZS-1K, Zhejiang Top Instrument Corporation Ltd., China) by the frequency domain  
25 reflectometer method at a depth of 5 cm. Measured soil water contents (v/v) were converted to water filled pore space  
26 (WFPS) with the following equation:

$$27 \text{WFPS} = \text{volumetric water content (cm}^3 \text{ cm}^{-3}) / \text{total soil porosity (cm}^3 \text{ cm}^{-3}) \quad (1)$$

28 Here, total soil porosity =  $[1 - (\text{soil bulk density (g cm}^{-3}) / 2.65)]$  with an assumed soil particle density of 2.65 (g cm<sup>-3</sup>).

29 The total soil bulk density was determined with the cutting ring method according to Lu (2000).

30 After each vegetable crop reached physiological maturity, the fresh vegetable yield was measured by weighing the



1 whole aboveground and belowground biomass in each pot.

$$2 \text{ GNrE} = \text{cumulative N}_2\text{O} + \text{cumulative NO} + \text{cumulative NH}_3 \text{ emissions (kg N ha}^{-1}\text{)} \quad (2)$$

$$3 \text{ GNrI} = \text{GNrE} / \text{vegetable fresh yield (kg N t}^{-1} \text{ yield)} \quad (3)$$

4 After the one-year pot experiment, a soil sample from each pot was blended carefully. One subsample was stored at  
5 4 °C for determination of microbial biomass carbon (MBC), potential nitrification rate (PNR) and denitrification enzyme  
6 activity (DEA) within 3 days. Another subsample was air-dried for analysis of SOC, TN, pH and EC. MBC was  
7 determined by substrate-induced respiration using a gas chromatography (Anderson and Domsch 1978). PNR was  
8 measured using the chlorate inhibition soil-slurry method as previously described (Kurola et al., 2005) with  
9 modifications (Hu et al., 2016). DEA was quantified as described by Smith and Tiedje (1979).

#### 10 *2.5. Data processing and statistics*

11 One-way ANOVA was performed to test the effects of the treatments on cumulative N<sub>2</sub>O, NO and NH<sub>3</sub> emissions;  
12 GNrE; vegetable yield and GNrI. Two-way ANOVA was used to analyze the effects of the biochar type; soil type; and  
13 their interactions on N<sub>2</sub>O, NO and NH<sub>3</sub> emissions, vegetable yield, GNrE and GNrI throughout the experimental period.  
14 Multiple comparisons among the treatments were further explained using Tukey's HSD test. Significant differences were  
15 considered at  $P < 0.05$ . All statistical analyses were performed using JMP ver. 7.0 (SAS Institute, Cary, NC, USA, 2007).  
16 Pearson's correlation analysis was used to determine whether there were significant interrelationships between N<sub>2</sub>O/NO  
17 and PNR or DEA in each soil, using SPSS window version 18.0 (SPSS Inc., Chicago, USA).

### 1 **3. Results**

#### 2 *3.1. Soil responses to biochar amendment*

3 Obvious differences in all observed soil properties existed among soil types (Table 1,  $p < 0.001$ ), suggesting the  
4 wide variations of soil characters across mainland China. Additionally, biochar amendments had significant influences on  
5 all the soil properties (Table 1,  $p < 0.05$ ). Compared with N treatments, biochar amendments increased the SOC, TN and  
6 EC by 20.4–135.0 %, 0.5–21.2 % and 2.4–38.1 %, respectively, across all the soils. Compared with Bw, Bm amendment  
7 resulted in higher contents of SOC and TN by 5.8–20.5 % and 9.5–14.2 %, respectively, whereas EC values were higher  
8 by 3.3–21.5 % induced by Bw than Bm amendment over all soils. Additionally, biochar amendments significantly  
9 increased soil pH by 0.27–0.64 and 0.08–0.10 units compared with N treatment in HN and SX soils ( $p < 0.05$ ),  
10 respectively, and higher values were detected with Bm than Bw amendment in all soils. Furthermore, biochar  
11 amendments tended to increase MBC in SD and HLJ soils, and Bm performed better in MBC enhancements than Bw in  
12 all soils.

13 As shown in Fig. 1, no consensus effects on PNR and DEA were observed with biochar amendments across all soils.  
14 Compared with N treatment, biochar amendments significantly increased PNR in HLJ while exerted no influences on SD  
15 soil (Fig. 1a). Compared with Bw, Bm amendment significantly increased PNR in HN and SX soils. Moreover, compared  
16 with N, biochar amendments reduced DEA in most soils, significantly in SX and HLJ by an average of 40.1 and 37.8 %  
17 (Fig. 1b,  $p < 0.05$ ), respectively. In comparison with Bw, remarkable enhancements in DEA were observed by 42.5 and  
18 74.4 % with Bm amendment in HN and SX soils, respectively ( $p < 0.05$ ).

#### 19 *3.2. Seasonal variations of $N_2O$ and NO emissions*

20 The dynamics of  $N_2O$  fluxes from all N-applied treatments in the four vegetable soils were relatively consistent and  
21 followed a sporadic and pulse-like pattern that was accompanied with fertilization, tillage and irrigation (Fig. 2). In  
22 addition, peak  $N_2O$  fluxes varied greatly. Most of the  $N_2O$  emissions occurred during the Amaranth and Tung choy  
23 growing periods, and there were several small emissions peaks during the Spinach and Coriander herb growing periods  
24 due to lower N application rate (Table S2), soil temperature and water content (Fig. S2). The highest peaks of  $N_2O$   
25 emissions from HN, SX, SD and HLJ were 4133.7, 1784.0, 432.4 and 1777.2  $\mu\text{g N m}^{-2} \text{h}^{-1}$ , respectively. Although  
26 biochar (Bw and Bm) application did not significantly alter the seasonal pattern of the  $N_2O$  fluxes, they greatly lowered  
27 some peaks of  $N_2O$  emissions in the SX and HLJ vegetable soils (Fig. 2b and d).

28 Clearly, the NO fluxes demonstrated similar seasonal dynamics to the  $N_2O$  fluxes (Fig. 3). Some relatively high  
29 peak NO fluxes were still observed in the Spinach and Coriander herb planting seasons even though relatively low  
30 temperatures occurred during these periods, primarily due to lower soil moisture which was suitable for NO production.

1 The NO fluxes ranged from -44.6 to 377.6  $\mu\text{g N m}^{-2} \text{h}^{-1}$  across all soil types. Furthermore, some NO peaks were  
2 significantly weakened with the Bw and Bm in the HN soil (Fig. 3a).

### 3 3.3. Cumulative $\text{N}_2\text{O}$ , NO and $\text{NH}_3$ emissions

4 Cumulative  $\text{N}_2\text{O}$  emissions varied greatly among soil types (Table 2,  $p < 0.001$ ), from 1.97 to 31.56  $\text{kg N ha}^{-1}$  across  
5 all the soils during the vegetable cultivation period (Table 3a). Biochar amendments had significant influences on the  
6 cumulative  $\text{N}_2\text{O}$  emissions, reducing  $\text{N}_2\text{O}$  emissions by 13.7–41.6 % (Table 2). In comparison with the N treatment,  
7 biochar amendment resulted in no consistent effects on  $\text{N}_2\text{O}$  emissions over all soils (Table 3a), indicating significant  
8 interactions between biochar and soil types (Table 2,  $p < 0.001$ ). Additionally, Bw amendment performed better  
9 mitigation effects which decreased  $\text{N}_2\text{O}$  emissions by 11.8–38.4 % across all the soils, significantly in HN soil in relation  
10 to Bm (Table 3a,  $p < 0.05$ ). The values of cumulative NO emissions were much smaller than those of  $\text{N}_2\text{O}$  emissions,  
11 with a remarkable variation of 0.20–8.99  $\text{kg N ha}^{-1}$  across all soils (Table 3b). Though pronounced effects on NO  
12 emissions with a reduction by average of 45.8 % (Table 2,  $p < 0.05$ ), biochar amendments had no consensus effects  
13 across soils (Table 3b), which suggested significant interactions between biochar and soil types (Table 2,  $p < 0.001$ ).  
14 Compared with Bm, Bw amendment significantly reduced NO emissions in SX and HLJ soils (Table 3b,  $p < 0.05$ ).  
15 Moreover,  $\text{N}_2\text{O}$  emissions had positive relationships with DEA both in SX and HLJ soils, and were affected positively  
16 with PNR in HN soil (Table 4). Additionally, NO emissions had positive correlations with both PNR and DEA in SX soil.  
17 However, neither  $\text{N}_2\text{O}$  nor NO emissions were influenced significantly by PNR and DEA in SD soils.

18 As is shown in Table 3c, the cumulative  $\text{NH}_3$  emissions fluctuated greatly from 4.72–7.57  $\text{kg N ha}^{-1}$  across all the  
19 soils. Though significantly enhancing  $\text{NH}_3$  emissions (Table 2), biochar amendments produced no significant influences  
20 on the  $\text{NH}_3$  emissions relative to N treatment in most soils (Table 3c). A tendency was found for the cumulative  $\text{NH}_3$   
21 emissions in N+Bm to be higher than those in the N+Bw treatment, although this difference was not remarkable within  
22 each soil. Additionally, stimulation effects were consistently present after the first fertilization event in each type of soil  
23 (Fig. 4).

### 24 3.4. Vegetable yield and gaseous reactive N intensity during the five-vegetable crop rotation

25 The vegetable yields for the five consecutive vegetable crops are presented in Table 3e. Pronounced differences  
26 existed among all soils (Table 2,  $p < 0.001$ ). Biochar amendments exerted no significant effects on vegetable yield (Table  
27 2). Compared with the N treatment, biochar amendments were prone to increase vegetable yield in SD and HLJ soils  
28 against HN and SX soils (Tables 3e), denoting pronounced interactions between soil and biochar (Table 2,  $p < 0.05$ ).  
29 Compared with Bm, Bw amendment lowered total yield over all the soils (Table 3e), significantly in HN and SD soils ( $p <$   
30 0.05).

1            Table 3f presents the GNrI during the whole experiment period, with a pronounced variation among soils (Table 2,  $p$   
2 < 0.001). The GNrI was greatly affected by biochar amendment during the whole experiment period (Table 2,  $p < 0.01$ ).  
3 Compared to N treatment, biochar amendments reduced the GNrI by 4.3–27.8 % across all soils, significantly in SX and  
4 HLJ soils (Table 3f,  $p < 0.05$ ). Moreover, there were no remarkable differences between Bw and Bm throughout all soils.

## 1 **4. Discussion**

### 2 *4.1. Biochar effects on GNrEs across different soil types*

3 The effects of biochar amendment on the N<sub>2</sub>O and NO emissions may be positive, negative or neutral, largely  
4 depending on the soil condition and the inherent characteristics of the biochar (Spokas and Reicosky, 2009; Nelissen et  
5 al., 2014). In our study, effects of two biochars on the N<sub>2</sub>O and NO emissions did not follow a consensus trend across the  
6 four typical vegetable soils (Table 3a, b). In agreement with Cayuela et al. (2014), who reported that the role of biochar in  
7 mitigating N<sub>2</sub>O emission was maximal in soils close to neutrality, remarkable mitigation effects were observed in SX and  
8 HLJ with the biochar amendments (Table 3a). These findings potentially resulted from the effects of the biochars on soil  
9 aeration, C/N ratio and pH, which affected the N dynamics and N cycling processes (Zhang et al., 2010; Ameloot et al.,  
10 2015). In line with Obia et al. (2015), biochar decreased NO emissions in low-pH HN soil (Table 3b), probably by  
11 inducing denitrification enzymes with higher activity, and then resulted in less NO accumulation relative to N<sub>2</sub>  
12 production. Moreover, the liming effects of biochar prevented the chemical decomposition of NO<sub>2</sub><sup>-</sup> to NO (Islam et al.,  
13 2008), leaving only enzymatically produced NO to accumulate. However, neither N<sub>2</sub>O nor NO emission was significantly  
14 influenced by PNR or DEA, suggesting other processes might play vital roles in SD soil. Besides nitrification and  
15 denitrification, nitrifier denitrification (Wrage et al., 2001) and heterotrophic nitrification (Zhu et al., 2011) can be  
16 important processes for producing N<sub>2</sub>O and NO as well, especially in vegetable soils with low pH, low carbon  
17 content and high N content (Wrage et al., 2001). Ma et al. (2015) indicated that nitrifier denitrification might be the  
18 main process producing N<sub>2</sub>O in the North China Plain. In addition, surplus N input in vegetable systems probably  
19 masked the beneficial effects of the biochar addition on the N transformation (Wang et al., 2015a). Therefore, the  
20 underlying mechanism of how biochar affect those processes needs to be illustrated in the further research.

21 On the other hand, different biochars may not produce universal influences on N<sub>2</sub>O emissions for the same soil due  
22 to the distinct properties of the biochar (Spokas and Reicosky, 2009). In the current study, overall, in comparison with  
23 Bm, the Bw amendment had more effective mitigation effects on N<sub>2</sub>O and NO emissions (Table 3a, b), largely due to the  
24 following reasons. First, compared with Bw, the contents of the TN and DOC in Bm were 1.8- and 1.4-fold (Table S1),  
25 respectively, which might supply extra N or C source for heterotrophic nitrification in the acidic HN soil, which made  
26 Bm ineffective for reducing the N<sub>2</sub>O emissions (Table 3a). This result was in accordance with Li et al. (2015a), who  
27 observed that biochar amendment had no significant influence on the cumulative N<sub>2</sub>O emissions, and even higher N<sub>2</sub>O  
28 emissions occurred when biochar was input. Additionally, as shown in Fig.1, Bm was more prone to stimulate PNR and  
29 DEA, thus displaying lower mitigation ability than Bw. Second, compared with Bm, the C/N ratio was approximately  
30 twofold in Bw (Table S1), presumably leading to more inorganic nitrogen being immobilized in biochar with a higher

1 C/N ratio (Ameloot et al., 2015), decreasing the available N for microorganisms. Last, as presented in Fig. S3 and Table  
2 S1, Bw had more pores and surface area, having a better advantage over Bm in absorbing NO accordingly. Others have  
3 found that the lower mitigation capacity of high-N biochars (e.g., manures or biosolids) is probably due to the increased  
4 N release in the soil from the biochar (Schouten et al., 2012). To our knowledge, very few studies have investigated  
5 biochar effects on NO emissions (Nelissen et al., 2014; Obia et al., 2015), and the mechanisms through which biochar  
6 influence NO emissions are not elucidated yet. Therefore, more research is needed to clarify the underlying mechanisms  
7 of biochar on NO emission.

8 Intensive managed soils receiving fertilizer such as urea or anhydrous NH<sub>3</sub> and ruminant urine patches are potential  
9 hot spots for NH<sub>3</sub> formation, where the use of biochar is expected to retain NH<sub>3</sub>-N in the soil system (Clough and  
10 Condron, 2010). Actually, the effects of biochar amendments on NH<sub>3</sub> volatilization largely depend on soil characteristics,  
11 biochar types and duration time. Soil texture is an important factor impacting NH<sub>3</sub> transfer and release. More clay  
12 contents were present in the SX soil (Table S1), which was limited in large soil pores, thus, the addition of porous  
13 biochar could enhance the soil aeration, promoting NH<sub>3</sub> volatilization (Sun et al., 2014). Additionally, it was worthy to  
14 note that cumulative NH<sub>3</sub> emissions were slightly higher in soils with the Bm than those with the Bw amendment (Fig. 4  
15 and Table 3c) and that difference could presumably be attributed to less surface area and the much higher pH of Bm (Fig.  
16 S3 and Table S1), resulting in weak adsorption and great liming effects.

#### 17 *4.2. Biochar effects on vegetable yield and GNrI across different soil types*

18 The application of biochar is usually intended to increase crop yields, and evidence suggests this may be successful  
19 (Schulz et al., 2013; Li et al., 2016). Due to its liming effect, biochar helps to improve the supply of essential macro- and  
20 micronutrients for plant growth (Chan and Xu, 2009; Major et al., 2010). Enhancement of vegetable yield with biochar  
21 amendment occurred in SD and HLJ soils (Table 3e). Additionally, the effects of Bm and Bw on vegetable yield were  
22 inconsistent, which probably due to the wide diversity of physicochemical characteristics of biochar that translates into  
23 variable reactions in soil (Novak et al., 2014). First, compared to Bw, Bm has a higher DOC content (Table S1), through  
24 which more nutrients may be directly introduced to the soil (Rajkovich et al., 2012). Secondly, besides their large amount  
25 of plant-available nutrients (Hass et al., 2012), biochars produced with manure have been generally considered  
26 significant for improving soil fertility by promoting soil structure development (Joseph et al., 2010), with the result that  
27 Bm was found superior to Bw in vegetable production enhancement in our case (Table 3e). As biochar effects on  
28 vegetable yield were variable, both biochar properties and soil conditions and crop species ought to be taken into account  
29 comprehensively before applying biochar to a certain soil condition.

30 However, no promotion of yield was observed with biochar amendments in HN and SX. This could be attributed to

1 exacerbated soil salinity, which inhibited the uptake of nutrients and water (Ju et al., 2006; Zhou et al., 2010) and the  
2 growth of the soil microorganisms (Setia et al., 2011), leading to unsustainable greenhouse vegetable production.  
3 Compared with other biochar (Jia et al., 2012), the higher amounts of ash in Bw and Bm may contain high salts causing  
4 soil salinity (Hussain et al., 2016). After the addition of the two salt-rich biochars, the EC values of HN and SX vegetable  
5 soils increased and reached the limits to tolerance for the leafy vegetables (Shannon and Grieve, 1998). Here, we  
6 assessed two feedstock-derived biochar effects on GNrI in typical cultivated vegetable soils across mainland China.  
7 Overall, biochar amendments reduced GNrI over all the soils, with the magnitude largely depending on soil type.  
8 Remarkable reduction in GNrI had been detected due to the efficient mitigation induced by biochar in SX and HLJ (Table  
9 3f). However, despite enhanced vegetable yield, no significant decreases in GNrI were observed in SD, mainly because  
10 of the absence of mitigation effects on N<sub>2</sub>O, NO and NH<sub>3</sub> emissions of biochars (Table 3a, b and c) Overall, Bw was  
11 superior to Bm in mitigating the GNrE while Bm performed better in vegetable yield enhancement (Table 3d and e).  
12 Therefore, mitigation efficacys on GNrI were not notably different between Bw and Bm amendments across the four  
13 soils.

1 **5. Conclusion**

2       The study demonstrated that biochar amendments mostly reduced N<sub>2</sub>O and NO emissions while slightly increased  
3 the NH<sub>3</sub> emissions, while produced no consensus influences on yield though those effects were largely both biochar- and  
4 soil-specific. Additionally, biochar amendments did decrease GNrI in intensive vegetable soils across mainland China.  
5 Furthermore, Bw was superior to Bm in mitigating the GNrE whereas the Bm performed better in crop yield throughout  
6 all soils. Consequently, both soil type and biochar characteristics need to be seriously considered before large-scale  
7 biochar application under certain regions of intensive vegetable production.



1     **Acknowledge**

2     We would like to express our heartfelt gratitude to the anonymous reviewers for the constructive comments that greatly  
3     improved the manuscript. This work was jointly supported by the National Natural Science Foundation of China  
4     (41471192), Special Fund for Agro-Scientific Research in the Public Interest (201503106) and the Ministry of Science  
5     and Technology (2013BAD11B01).

## 1 **References**

- 2 Ameloot, N., Sleutel, S., Das, K. C., Kanagaratnam, J., and Neve, S. D.: Biochar amendment to soils with contrasting  
3 organic matter level: effects on N mineralization and biological soil properties, *Global Change Biology Bioenergy*, 7,  
4 135–144, 2015.
- 5 Anderson, J. and Domsch, K.: A physiological method for the quantitative measurement of microbial biomass in soils,  
6 *Soil biology and biochemistry*, 10, 215–221, 1978.
- 7 Anenberg, S. C., Schwartz, J., Shindell, D., Amann, M., Faluvegi, G., Klimont, Z., Janssensmaenhout, G., Pozzoli, L.,  
8 Van, D. R., and Vignati, E.: Global Air Quality and Health Co-benefits of Mitigating Near-Term Climate Change  
9 through Methane and Black Carbon Emission Controls, *Environmental Health Perspectives*, 120, 831–839, 2012.
- 10 Avnery, S., Mauzerall, D. L., Liu, J., and Horowitz, L. W.: Global crop yield reductions due to surface ozone exposure: 1.  
11 Year 2000 crop production losses and economic damage, *Atmospheric Environment*, 45, 2284–2296, 2011.
- 12 Behera, S. N., Sharma, M., Aneja, V. P., and Balasubramanian, R.: Ammonia in the atmosphere: a review on emission  
13 sources, atmospheric chemistry and deposition on terrestrial bodies, *Environmental Science and Pollution Research*,  
14 20, 8092–8131, 2013.
- 15 Boyer, E. W., Goodale, C. L., Jaworski, N. A., and Howarth, R. W.: Anthropogenic nitrogen sources and relationships to  
16 riverine nitrogen export in the northeastern USA. In: *The Nitrogen Cycle at Regional to Global Scales*, Springer,  
17 2002.
- 18 Cayuela, M., Van Zwieten, L., Singh, B., Jeffery, S., Roig, A., and S á nchez-Monedero, M.: Biochar's role in mitigating  
19 soil nitrous oxide emissions: A review and meta-analysis, *Agriculture, Ecosystems & Environment*, 191, 5–16, 2014.
- 20 Chan, K. Y. and Xu, Z.: Biochar: nutrient properties and their enhancement, *Biochar for environmental management:*  
21 *science and technology*, 2009. 67–84, 2009.
- 22 Ciais, P.: Carbon and other biogeochemical cycles: Final draft underlying scientific technical assessment, IPCC  
23 Secretariat, Geneva, 2013. 2013.
- 24 Clough, T. J. and Condrón, L. M.: Biochar and the nitrogen cycle: introduction, *Journal of Environmental Quality*,  
25 39, 1218-1223, 2010.
- 26 Clough, T. J., Bertram, J. E., Ray, J. L., Condrón, L. M., O'Callaghan, M., Sherlock, R. R., and Wells, N. S.: Unweathered  
27 Wood Biochar Impact on Nitrous Oxide Emissions from a Bovine-Urine-Amended Pasture Soil, *Soil Science*  
28 *Society of America Journal*, 74, 852–860, 2010.
- 29 Deng, J., Zhou, Z., Zheng, X., and Li, C.: Modeling impacts of fertilization alternatives on nitrous oxide and nitric oxide  
30 emissions from conventional vegetable fields in southeastern China, *Atmospheric Environment*, 81, 642–650, 2013.

1 Diao, T., Xie, L., Guo, L., Yan, H., Lin, M., Zhang, H., Lin, J., and Lin, E.: Measurements of N<sub>2</sub>O emissions from  
2 different vegetable fields on the North China Plain, *Atmospheric Environment*, 72, 70–76, 2013.

3 FAO, IIASA, ISRIC, and ISSCAS: Harmonized World Soil Database Version 1.2, 2012. 2012.

4 Field, J. L., Keske, C. M. H., Birch, G. L., Defoort, M. W., and Cotrufo, M. F.: Distributed biochar and bioenergy  
5 coproduction: a regionally specific case study of environmental benefits and economic impacts, *Global Change  
6 Biology Bioenergy*, 5, 177–191, 2013.

7 Food and Agriculture Organization (FAO) (2015) FAOSTAT (Food and Agriculture Organization Statistical Data)  
8 Statistical Yearbook Vol. 4. Available at: <http://faostat.fao.org> (accessed 12 August 2015)

9 Harrison, R. and Webb, J.: A review of the effect of N fertilizer type on gaseous emissions, *Advances in Agronomy*, 73,  
10 65–108, 2001.

11 Hass, A., Gonzalez, J. M., Lima, I. M., Godwin, H. W., Halvorson, J. J., and Boyer, D. G.: Chicken manure biochar as  
12 liming and nutrient source for acid Appalachian soil, *Journal of Environmental Quality*, 41, 1096–1106, 2012.

13 Hu, H. W., Macdonald, C. A., Trivedi, P., Anderson, I. C., Zheng, Y., Holmes, B., Bodrossy, L., Wang, J. T., He, J. Z., and  
14 Singh, B. K.: Effects of climate warming and elevated CO<sub>2</sub> on autotrophic nitrification and nitrifiers in dryland  
15 ecosystems, *Soil Biology & Biochemistry*, 92, 1–15, 2016.

16 Hussain, M., Farooq, M., Nawaz, A., Al-Sadi, A. M., Solaiman, Z. M., Alghamdi, S. S., Ammara, U., Yong, S. O., and  
17 Siddique, K. H. M.: Biochar for crop production: potential benefits and risks, *Journal of Soils & Sediments*, 2016.  
18 1–32, 2016.

19 IPCC: Climate Change 2013: The Physical Science Basis: working group I contribution to the Fifth Assessment Report  
20 of the Intergovernmental Panel on Climate Change, Cambridge University Press, Stockholm, 2013.

21 Islam, A., Chen, D., White, R. E., and Weatherley, A. J.: Chemical decomposition and fixation of nitrite in acidic pasture  
22 soils and implications for measurement of nitrification, *Soil Biology & Biochemistry*, 40, 262–265, 2008.

23 Jia, J., Li, B., Chen, Z., Xie, Z., and Xiong, Z.: Effects of biochar application on vegetable production and emissions of  
24 N<sub>2</sub>O and CH<sub>4</sub>, *Soil Science and Plant Nutrition*, 58, 503–509, 2012.

25 Joseph, S. D., Camparbestain, M., Lin, Y., Munroe, P., Chia, C. H., Hook, J., Van, Z. L., Kimber, S., Cowie, A., and  
26 Singh, B. P.: An investigation into the reactions of biochar in soil, *Australian Journal of Soil Research*, 48, 501–515,  
27 2010.

28 Ju, X. T., Kou, C. L., Zhang, F. S., and Christie, P.: Nitrogen balance and groundwater nitrate contamination: comparison  
29 among three intensive cropping systems on the North China Plain, *Environmental Pollution*, 143, 117–125, 2006.

30 Kim, J. Y., Song, C. H., Ghim, Y. S., Won, J. G., Yoon, S. C., Carmichael, G. R., and Woo, J. H.: An investigation on NH<sub>3</sub>

1 emissions and particulate  $\text{NH}_4^+$ - $\text{NO}_3^-$  formation in East Asia, *Atmospheric Environment*, 40, 2139–2150, 2006.

2 Kurolo, J., Salkinoja-Salonen, M., Aarnio, T., Hultman, J., and Romantschuk, M.: Activity, diversity and population size  
3 of ammonia-oxidising bacteria in oil-contaminated landfarming soil, *FEMS Microbiology Letters*, 250, 33–38,  
4 2005.

5 Langridge, J. M., Lack, D., Brock, C. A., Bahreini, R., Middlebrook, A. M., Neuman, J. A., Nowak, J. B., Perring, A. E.,  
6 Schwarz, J. P., and Spackman, J. R.: Evolution of aerosol properties impacting visibility and direct climate forcing  
7 in an ammonia-rich urban environment, *Journal of Geophysical Research Atmospheres*, 117, 2240–2260, 2012.

8 Li, B., Bi, Z., and Xiong, Z.: Dynamic responses of nitrous oxide emission and nitrogen use efficiency to nitrogen and  
9 biochar amendment in an intensified vegetable field in southeastern China, *Global Change Biology Bioenergy*, 2016.  
10 2016.

11 Li, B., Fan, C. H., Xiong, Z. Q., Li, Q. L., and Zhang, M.: The combined effects of nitrification inhibitor and biochar  
12 incorporation on yield-scaled  $\text{N}_2\text{O}$  emissions from an intensively managed vegetable field in southeastern China,  
13 *Biogeosciences*, 12, 15185–15214, 2015a.

14 Li, B., Fan, C. H., Zhang, H., Chen, Z. Z., Sun, L. Y., and Xiong, Z. Q.: Combined effects of nitrogen fertilization and  
15 biochar on the net global warming potential, greenhouse gas intensity and net ecosystem economic budget in  
16 intensive vegetable agriculture in southeastern China, *Atmospheric Environment*, 100, 10–19, 2015b.

17 Liu, X., Zhang, A., Ji, C., Joseph, S., Bian, R., Li, L., Pan, G., and Paz-Ferreiro, J.: Biochar's effect on crop productivity  
18 and the dependence on experimental conditions—a meta-analysis of literature data, *Plant and Soil*, 373, 583–594,  
19 2013.

20 Lu, R.: *Methods of soil and agro-chemical analysis*, China Agricultural Science and Technology Press, Beijing, 2000.  
21 127–332, 2000. (in Chinese)

22 Ma, L., Shan, J., Yan, X., 2015. Nitrite behavior accounts for the nitrous oxide peaks following fertilization in a  
23 fluvo-aquic soil. *Biology and Fertility of Soils* 51, 563-572.

24 Major, J., Lehmann, J., Rondon, M., and Goodale, C.: Fate of soil-applied black carbon: downward migration, leaching  
25 and soil respiration, *Global Change Biology*, 16, 1366–1379, 2010.

26 Mei, B. L., Zheng, X. H., Xie, B. H., Dong, H. B., Zhou, Z. X., Rui, W., Jia, D., Feng, C., Tong, H. J., and Zhu, J. G.:  
27 Nitric oxide emissions from conventional vegetable fields in southeastern China, *Atmospheric Environment*, 43,  
28 2762–2769, 2009.

29 Misselbrook, T. H., Weerden, T. J. V. D., Pain, B. F., Jarvis, S. C., Chambers, B. J., Smith, K. A., Phillips, V. R., and  
30 Demmers, T. G. M.: Ammonia emission factors for UK agriculture, *Atmospheric Environment*, 34, 871–880(810),

1 2000.

2 Mukherjee, A. and Zimmerman, A. R.: Organic carbon and nutrient release from a range of laboratory-produced biochars  
3 and biochar–soil mixtures, *Geoderma*, s 193–194, 122–130, 2013.

4 Nelissen, V.: Effect of different biochar and fertilizer types on N<sub>2</sub>O and NO emissions, *Soil Biology & Biochemistry*, 70,  
5 244–255, 2014.

6 Novak, J. M., Spokas, K. A., Cantrell, K. B., Ro, K. S., Watts, D. W., Glaz, B., Busscher, W. J., and Hunt, P. G.: Effects  
7 of biochars and hydrochars produced from lignocellulosic and animal manure on fertility of a Mollisol and Entisol,  
8 *Soil Use and Management*, 30, 175–181, 2014.

9 Obia, A., Cornelissen, G., Mulder, J., and Dörsch, P.: Effect of Soil pH Increase by Biochar on NO, N<sub>2</sub>O and N<sub>2</sub>  
10 Production during Denitrification in Acid Soils, *Plos One*, 10, 359–367, 2015.

11 Pacholski, A., Cai, G. X., Fan, X. H., Ding, H., Chen, D., Nieder, R., and Roelcke, M.: Comparison of different methods  
12 for the measurement of ammonia volatilization after urea application in Henan Province, China, *Journal of Plant  
13 Nutrition and Soil Science*, 171, 361–369, 2008.

14 Pinder, R. W., Adams, P. J., and Pandis, S. N.: Ammonia emission controls as a cost-effective strategy for reducing  
15 atmospheric particulate matter in the Eastern United States, *Environmental Science & Technology*, 41, 380–386,  
16 2007.

17 Powlson, D. S., Addiscott, T. M., Benjamin, N., Cassman, K. G., de Kok, T. M., Van, G. H., L'Hirondel, J. L., Avery, A.  
18 A., and Van, K. C.: When does nitrate become a risk for humans?, *Journal of Environmental Quality*, 37, 291–295,  
19 2008.

20 Rajkovich, S., Enders, A., Hanley, K., Hyland, C., Zimmerman, A. R., and Lehmann, J.: Corn growth and nitrogen  
21 nutrition after additions of biochars with varying properties to a temperate soil, *Biology & Fertility of Soils*, 48,  
22 271–284, 2012.

23 Ravishankara, A. R., Daniel, J. S., and Portmann, R. W.: Nitrous oxide (N<sub>2</sub>O): the dominant ozone-depleting substance  
24 emitted in the 21st century, *Science*, 326, 123–125, 2009.

25 Saarnio, S., Heimonen, K., and Kettunen, R.: Biochar addition indirectly affects N<sub>2</sub>O emissions via soil moisture and  
26 plant N uptake, *Soil Biology & Biochemistry*, 58, 99–106, 2013.

27 Schouten, S., Groenigen, J. W. V., Oenema, O., and Cayuela, M. L.: Bioenergy from cattle manure? Implications of  
28 anaerobic digestion and subsequent pyrolysis for carbon and nitrogen dynamics in soil, *Global Change Biology  
29 Bioenergy*, 4, 751–760, 2012.

30 Schulz, H., Dunst, G., and Glaser, B.: Positive effects of composted biochar on plant growth and soil fertility, *Agronomy*

1 for Sustainable Development, 33, 817–827, 2013.

2 Setia, R., Marschner, P., Baldock, J., Chittleborough, D., and Verma, V.: Relationships between carbon dioxide emission  
3 and soil properties in salt-affected landscapes, *Soil Biology & Biochemistry*, 43, 667–674, 2011.

4 Shannon, M. C. and Grieve, C. M.: Tolerance of vegetable crops to salinity, *Scientia Horticulturae*, 78, 5–38, 1998.

5 Smith, M. S. and Tiedje, J. M.: Phases of denitrification following oxygen depletion in soil, *Soil Biology & Biochemistry*,  
6 11, 261–267, 1979.

7 Smith, P.: Soil carbon sequestration and biochar as negative emission technologies, *Global Change Biology*, 51, 574–575,  
8 2016.

9 Sohi, S. P.: Agriculture. Carbon storage with benefits, *Science*, 338, 1034–1035, 2012.

10 Sororzano, L.: Determination of ammonia in natural waters by the phenolhypochlorite method, *Limnol. Oceanogr*, 14,  
11 799–801, 1969.

12 Spokas, K. A. and Reicosky, D. C.: Impacts of sixteen different biochars on soil greenhouse gas production, *Ann.*  
13 *Environ. Sci*, 3, 4, 2009.

14 Stavi, I. and Lal, R.: Agroforestry and biochar to offset climate change: a review, *Agronomy for Sustainable*  
15 *Development*, 33, 81–96, 2013.

16 Sun, L., Li, L., Chen, Z., Wang, J., and Xiong, Z.: Combined effects of nitrogen deposition and biochar application on  
17 emissions of N<sub>2</sub>O, CO<sub>2</sub> and NH<sub>3</sub> from agricultural and forest soils, *Soil science and plant nutrition*, 60, 254–265,  
18 2014.

19 Ussiri, D. and Lal, R.: *The Role of Nitrous Oxide on Climate Change*, Springer Netherlands, 2013.

20 Wang, J., Chen, Z., Ma, Y., Sun, L., Xiong, Z., Huang, Q., and Sheng, Q.: Methane and nitrous oxide emissions as  
21 affected by organic–inorganic mixed fertilizer from a rice paddy in southeast China, *Journal of Soils and Sediments*,  
22 13, 1408–1417, 2013.

23 Wang, J., Chen, Z., Xiong, Z., Chen, C., Xu, X., Zhou, Q., and Kuzyakov, Y.: Effects of biochar amendment on  
24 greenhouse gas emissions, net ecosystem carbon budget and properties of an acidic soil under intensive vegetable  
25 production, *Soil Use and Management*, 31, 375–383, 2015a.

26 Wang, S., Nan, J., Shi, C., Fu, Q., Gao, S., Wang, D., Cui, H., Saizlopez, A., and Zhou, B.: Atmospheric ammonia and its  
27 impacts on regional air quality over the megacity of Shanghai, China, *Scientific Reports*, 5, 2015b.

28 Wrage, N., Velthof, G., Van Beusichem, M., Oenema, O., 2001. Role of nitrifier denitrification in the production of  
29 nitrous oxide. *Soil Biology and Biochemistry* 33, 1723-1732.

30 Xiong, Z., Xie, Y., Xing, G., Zhu, Z., and Butenhoff, C.: Measurements of nitrous oxide emissions from vegetable

1 production in China, *Atmospheric Environment*, 40, 2225–2234, 2006.

2 Yao, Z., Zheng, X., Xie, B., Mei, B., Wang, R., Klaus, B. B., Zhu, J., and Yin, R.: Tillage and crop residue management  
3 significantly affects N-trace gas emissions during the non-rice season of a subtropical rice-wheat rotation, *Soil  
4 Biology & Biochemistry*, 41, 2131–2140, 2009.

5 Zhang, A., Cui, L., Pan, G., Li, L., Hussain, Q., Zhang, X., Zheng, J., and Crowley, D.: Effect of biochar amendment on  
6 yield and methane and nitrous oxide emissions from a rice paddy from Tai Lake plain, China, *Agriculture  
7 Ecosystems & Environment*, 139, 469–475, 2010.

8 Zhang, F., Chen, X., and Vitousek, P.: Chinese agriculture: An experiment for the world, *Nature*, 497, 33-35, 2013.

9 Zhang, M., Fan, C. H., Li, Q. L., Li, B., Zhu, Y. Y., and Xiong, Z. Q.: A 2-yr field assessment of the effects of chemical  
10 and biological nitrification inhibitors on nitrous oxide emissions and nitrogen use efficiency in an intensively  
11 managed vegetable cropping system, *Agriculture Ecosystems & Environment*, 201, 43–50, 2015.

12 Zhang, Y., Luan, S., Chen, L., and Shao, M.: Estimating the volatilization of ammonia from synthetic nitrogenous  
13 fertilizers used in China, *Journal of Environmental Management*, 92, 480–493, 2011.

14 Zhao, L. M., Wu, L. H., Dong, C. J., and Li, Y. S.: Rice yield, nitrogen utilization and ammonia volatilization as  
15 influenced by modified rice cultivation at varying nitrogen rates, *Agricultural Sciences*, 01, 10–16, 2010.

16 Zhao, X., Wang, J., Wang, S., and Xing, G.: Successive straw biochar application as a strategy to sequester carbon and  
17 improve fertility: A pot experiment with two rice/wheat rotations in paddy soil, *Plant and Soil*, 378, 279–294, 2014.

18 Zheng, X., Mei, B., Wang, Y., Xie, B., Wang, Y., Dong, H., Xu, H., Chen, G., Cai, Z., and Yue, J.: Quantification of N<sub>2</sub>O  
19 fluxes from soil–plant systems may be biased by the applied gas chromatograph methodology, *Plant and Soil*, 311,  
20 211–234, 2008.

21 Zhou, J. B., Chen, Z. J., Liu, X. J., Zhai, B. N., and Powlson, D. S.: Nitrate accumulation in soil profiles under  
22 seasonally open ‘sunlight greenhouses’ in northwest China and potential for leaching loss during summer  
23 fallow, *Soil Use and Management*, 26, 332–339, 2010.

24 Zhu, T., Zhang, J., Cai, Z., 2011. The contribution of nitrogen transformation processes to total N<sub>2</sub>O emissions from  
25 soils used for intensive vegetable cultivation. *Plant and Soil* 343, 313-327.

1 **Table legends**

2 **Table 1**

3 Soil organic carbon (SOC), soil total nitrogen (TN), soil pH, electric conductivity (EC) and microbial biomass carbon  
 4 (MBC) as affected by different treatments across the four vegetable soils.

| Soil          | Treatment | SOC (g kg <sup>-1</sup> ) | TN (g kg <sup>-1</sup> ) | pH         | EC (ds m <sup>-1</sup> ) | MBC (mg kg <sup>-1</sup> ) |
|---------------|-----------|---------------------------|--------------------------|------------|--------------------------|----------------------------|
| HN            | N         | 8.0±0.8c                  | 1.37±0.12b               | 4.37±0.04c | 1.76±0.21b               | 1353±119a                  |
|               | N+Bw      | 15.6±0.5b                 | 1.47±0.07b               | 4.64±0.04b | 2.43±0.31a               | 1173±49b                   |
|               | N+Bm      | 18.8±0.6a                 | 1.64±0.04a               | 5.01±0.03a | 2.00±0.32ab              | 1234±50ab                  |
| SX            | N         | 9.7±0.7c                  | 1.55±0.04b               | 7.53±0.02b | 1.74±0.27b               | 490±9a                     |
|               | N+Bw      | 15.6±0.8b                 | 1.62±0.06b               | 7.61±0.05a | 2.25±0.22a               | 495±16a                    |
|               | N+Bm      | 17.5±1.1a                 | 1.79±0.03a               | 7.63±0.01a | 1.96±0.06ab              | 504±18a                    |
| SD            | N         | 7.9±0.1b                  | 1.13±0.04b               | 7.70±0.08a | 0.85±0.03b               | 535±13b                    |
|               | N+Bw      | 14.2±0.6a                 | 1.20±0.04b               | 7.66±0.03a | 0.92±0.04a               | 554±10ab                   |
|               | N+Bm      | 15.5±1.4a                 | 1.37±0.06a               | 7.71±0.03a | 0.87±0.02ab              | 573±12a                    |
| HLJ           | N         | 29.9±0.5b                 | 2.19±0.04b               | 6.91±0.05a | 0.83±0.03b               | 921±44b                    |
|               | N+Bw      | 36.0±1.5a                 | 2.20±0.03b               | 6.92±0.06a | 0.95±0.03a               | 988±56b                    |
|               | N+Bm      | 38.1±1.8a                 | 2.41±0.01a               | 6.94±0.04a | 0.92±0.06a               | 1242±196a                  |
| ANOVA results |           |                           |                          |            |                          |                            |
| Biochar       |           | ***                       | ***                      | ***        | ***                      | *                          |
| Soil          |           | ***                       | ***                      | ***        | ***                      | ***                        |
| Biochar×Soil  |           | *                         | n.s.                     | ***        | n.s.                     | **                         |

5 Data shown are means ± standard deviations of three replicates. See Fig. 1 for treatments codes. Different letters within  
 6 the same column indicate significant differences among treatments within the same soil at  $p < 0.05$  level.

7 \*\*\*Significant at  $p < 0.001$ ; \*\*significant at  $p < 0.01$ ; \*significant at  $p < 0.05$ ; n.s. not significant.



1 **Table 2**

2 Two-way ANOVA and mean effects of biochar (Bc) and soil (S) types on cumulative N<sub>2</sub>O, NO and NH<sub>3</sub> emissions, gaseous reactive nitrogen emission (GNrE), vegetable  
3 yield and gaseous reactive nitrogen intensity (GNrI) during the entire sampling period.

| Factors                | DF | N <sub>2</sub> O emission |       |     | NO emission |       |     | NH <sub>3</sub> emission |     |      | GNrE         |       |     | Vegetable yield |       |      | GNrI         |       |      |
|------------------------|----|---------------------------|-------|-----|-------------|-------|-----|--------------------------|-----|------|--------------|-------|-----|-----------------|-------|------|--------------|-------|------|
|                        |    | SS                        | F     | P   | SS          | F     | P   | SS                       | F   | P    | SS           | F     | P   | SS              | F     | P    | SS           | F     | P    |
| Bc                     | 2  | 271.9                     | 65.1  | *** | 46.4        | 174.7 | *** | 0.5                      | 0.8 | n.s. | 380.5        | 86.4  | *** | 76.2            | 3.2   | n.s. | 0.1          | 7.9   | **   |
| S                      | 3  | 1429.9                    | 228.1 | *** | 152.2       | 382.1 | *** | 4.1                      | 3.8 | *    | 2322.6       | 351.5 | *** | 4316.9          | 123.3 | ***  | 2.3          | 110.3 | ***  |
| Bc×S                   | 6  | 179.3                     | 14.3  | *** | 33.4        | 41.9  | *** | 1.4                      | 0.7 | n.s. | 234.5        | 17.7  | *** | 230.4           | 3.3   | *    | 0.1          | 1.6   | n.s. |
| Model                  | 11 | 4009.7                    | 174.5 | *** | 225.3       | 154.3 | *** | 29.1                     | 7.5 | ***  | 5290         | 218.3 | *** | 15962.0         | 124.4 | ***  | 5.8          | 77.0  | ***  |
| Error                  | 24 | 50.1                      |       |     | 3.2         |       |     | 8.5                      |     |      | 52.9         |       |     | 280.0           |       |      | 0.2          |       |      |
| biochar effect (n = 9) |    |                           |       |     |             |       |     |                          |     |      |              |       |     |                 |       |      |              |       |      |
| N mean                 |    | 12.01 ±1.44a              |       |     | 2.86 ±0.24a |       |     | 5.92 ±0.24b              |     |      | 43.81 ±1.25b |       |     | 20.50 ±1.60a    |       |      | 0.57 ±0.05a  |       |      |
| N+Bw mean              |    | 7.01 ±0.58b               |       |     | 1.55 ±0.14b |       |     | 6.65 ±0.27a              |     |      | 43.53 ±1.67b |       |     | 14.94 ±0.84b    |       |      | 0.45 ±0.04b  |       |      |
| N+Bm mean              |    | 10.37 ±0.56a              |       |     | 1.55 ±0.10b |       |     | 7.01 ±0.25a              |     |      | 49.53 ±1.11a |       |     | 18.60 ±0.65a    |       |      | 0.49 ±0.03ab |       |      |
| Soil effect (n = 9)    |    |                           |       |     |             |       |     |                          |     |      |              |       |     |                 |       |      |              |       |      |
| HN mean                |    | 27.20 ±1.85a              |       |     | 5.80 ±0.50a |       |     | 5.31 ±0.16c              |     |      | 33.06 ±1.65c |       |     | 38.04 ±1.90a    |       |      | 1.15 ±0.11a  |       |      |
| SX mean                |    | 4.89 ±0.45b               |       |     | 1.08 ±0.13b |       |     | 12.69 ±0.46a             |     |      | 25.05 ±1.11d |       |     | 12.69 ±0.46b    |       |      | 0.51 ±0.01b  |       |      |
| SD mean                |    | 2.25 ±0.26c               |       |     | 0.25 ±0.09c |       |     | 9.51 ±0.55b              |     |      | 44.88 ±0.49b |       |     | 9.51 ±0.55c     |       |      | 0.21 ±0.01c  |       |      |
| HLJ mean               |    | 4.48 ±0.68b               |       |     | 0.81 ±0.04b |       |     | 11.79 ±0.71a             |     |      | 79.50 ±2.41a |       |     | 11.79 ±0.71b    |       |      | 0.15 ±0.01c  |       |      |

4 SS: the sum of squares.

5 F value: the ratio of mean squares of two independents samples.

6 P value: the index of differences between the control group and the experimental group. \*, \*\* and \*\*\* indicate significance at  $p < 0.05$ ,  $p < 0.01$  and  $p < 0.001$ , respectively.

7 n.s.: not significant.

8 Data shown are means ± standard deviations of the nine replicates. See Fig. 1 for treatments codes. Different letters within the same column indicate significant differences

9 among treatments at  $p < 0.05$  level.

1 **Table 3**

2 Cumulative gaseous nitrogen (N<sub>2</sub>O, NO and NH<sub>3</sub>) emissions, gaseous reactive nitrogen emission (GNrE), vegetable yield  
 3 and gaseous reactive nitrogen intensity (GNrI) under the different treatments across the four soils.

| Treatments                                                         | HN          | SX          | SD          | HLJ          |
|--------------------------------------------------------------------|-------------|-------------|-------------|--------------|
| (a) Cumulative N <sub>2</sub> O emissions (kg N ha <sup>-1</sup> ) |             |             |             |              |
| N                                                                  | 30.59±3.15a | 7.83±0.60a  | 2.52±0.37a  | 7.10±1.91a   |
| N+Bw                                                               | 19.45±2.43b | 3.20±0.28b  | 1.97±0.21a  | 3.45±0.86b   |
| N+Bm                                                               | 31.56±1.35a | 3.63±0.62b  | 2.26±0.58a  | 4.01±0.68b   |
| (b) Cumulative NO emissions (kg N ha <sup>-1</sup> )               |             |             |             |              |
| N                                                                  | 8.99±1.01a  | 1.27±0.15a  | 0.20±0.08a  | 0.97±0.11a   |
| N+Bw                                                               | 4.54±0.60b  | 0.80±0.13b  | 0.33±0.19a  | 0.52±0.03b   |
| N+Bm                                                               | 3.87±0.30b  | 1.16±0.17a  | 0.21±0.10a  | 0.94±0.03a   |
| (c) Cumulative NH <sub>3</sub> emissions (kg N ha <sup>-1</sup> )  |             |             |             |              |
| N                                                                  | 4.72±0.27a  | 5.79±0.54b  | 6.34±0.51a  | 5.67±0.42a   |
| N+Bw                                                               | 5.09±0.38a  | 6.83±0.74ab | 7.35±0.75a  | 6.24±0.49a   |
| N+Bm                                                               | 5.32±0.42a  | 7.57±0.57a  | 7.37±1.11a  | 6.48±0.43a   |
| (d) GNrE (kg N ha <sup>-1</sup> )                                  |             |             |             |              |
| N                                                                  | 44.30±3.13a | 14.89±1.33a | 9.06±0.80a  | 13.74±1.67a  |
| N+Bw                                                               | 29.08±2.21b | 10.82±1.14b | 9.64±0.88a  | 10.21±0.92b  |
| N+Bm                                                               | 40.76±1.66a | 12.36±0.74b | 9.84±0.49a  | 11.42±0.27b  |
| (e) Vegetable yield (t ha <sup>-1</sup> )                          |             |             |             |              |
| N                                                                  | 35.20±2.52a | 25.29±3.90a | 39.09±2.03b | 75.65±5.84b  |
| N+Bw                                                               | 29.05±2.35b | 23.57±1.74a | 44.53±3.74b | 76.95±4.04ab |
| N+Bm                                                               | 34.93±2.87a | 26.30±2.63a | 51.00±3.18a | 85.89±3.29a  |
| (f) GNrI (kg N t <sup>-1</sup> yield)                              |             |             |             |              |
| N                                                                  | 1.27±0.18a  | 0.59±0.08a  | 0.23±0.02a  | 0.18±0.04a   |
| N+Bw                                                               | 1.01±0.12a  | 0.46±0.05b  | 0.22±0.04a  | 0.13±0.02b   |
| N+Bm                                                               | 1.17±0.15a  | 0.47±0.04b  | 0.19±0.01a  | 0.13±0.01b   |

4 Data shown are means ± standard deviations of the three replicates. See Fig. 1 for treatments codes. Different letters  
 5 within the same column indicate significant differences among treatments within the same soil at  $p < 0.05$  level.

1 **Table 4**

2 The correlations between N<sub>2</sub>O or NO emission and PNR or DEA in each soil.

| Item             | HN    |       | SX    |       | SD    |      | HLJ     |       |
|------------------|-------|-------|-------|-------|-------|------|---------|-------|
|                  | PNR   | DEA   | PNR   | DEA   | PNR   | DEA  | PNR     | DEA   |
| N <sub>2</sub> O | 0.75* | 0.66  | 0.49  | 0.76* | -0.10 | 0.16 | -0.82** | 0.70* |
| NO               | 0.62  | -0.29 | 0.79* | 0.69* | -0.54 | 0.01 | -0.63   | 0.22  |

3 Asterisks indicated 0.05 level significances (\* $p < 0.05$ ) and 0.01 level significances (\*\* $p < 0.01$ ), n = 9.

1 **Figure legends**

2 **Fig. 1** Potential nitrification rate (PNR) and Denitrification enzyme activity (DEA) under different treatments in HN, SX,  
3 SD and HLJ soils. The three treatments with each soil were urea without biochar (N), urea with wheat straw biochar  
4 (N+Bw) and urea with swine manure biochar (N+Bm). Bars indicate standard deviation (mean + SD, n = 3). Different  
5 letters above the bars indicate significant differences among the different treatments within the same soil, at  $p < 0.05$ .

6 **Fig. 2** Temporal dynamics of soil N<sub>2</sub>O ( $\mu\text{g N m}^{-2} \text{h}^{-1} \pm \text{SD}$ , n = 3) fluxes under different treatments in HN (a), SX (b), SD  
7 (c) and HLJ (d) vegetable soils with five consecutive vegetable crops. The solid arrows indicate fertilization. See Fig. 1  
8 for treatments codes.

9 **Fig. 3** Temporal dynamics of soil NO ( $\mu\text{g N m}^{-2} \text{h}^{-1} \pm \text{SD}$ , n = 3) fluxes under different treatments in HN (a), SX (b), SD  
10 (c) and HLJ (d) vegetable soils with five consecutive vegetable crops. The solid arrows indicate fertilization. See Fig. 1  
11 for treatments codes.

12 **Fig. 4** Cumulative ammonia (NH<sub>3</sub>) emissions from the HN (a), SX (b), SD (c) and HLJ (d) soils during the four nitrogen  
13 fertilization events F: every N fertilization event. The bars indicate the standard deviation of the mean ( $\text{kg N ha}^{-1} \pm \text{SD}$ , n  
14 = 3) of each treatment for the sum of the four N fertilization events. See Fig. 1 for treatments codes. Different letters  
15 above the bars indicate significant differences among the different treatments for each soil, at  $p < 0.05$ .

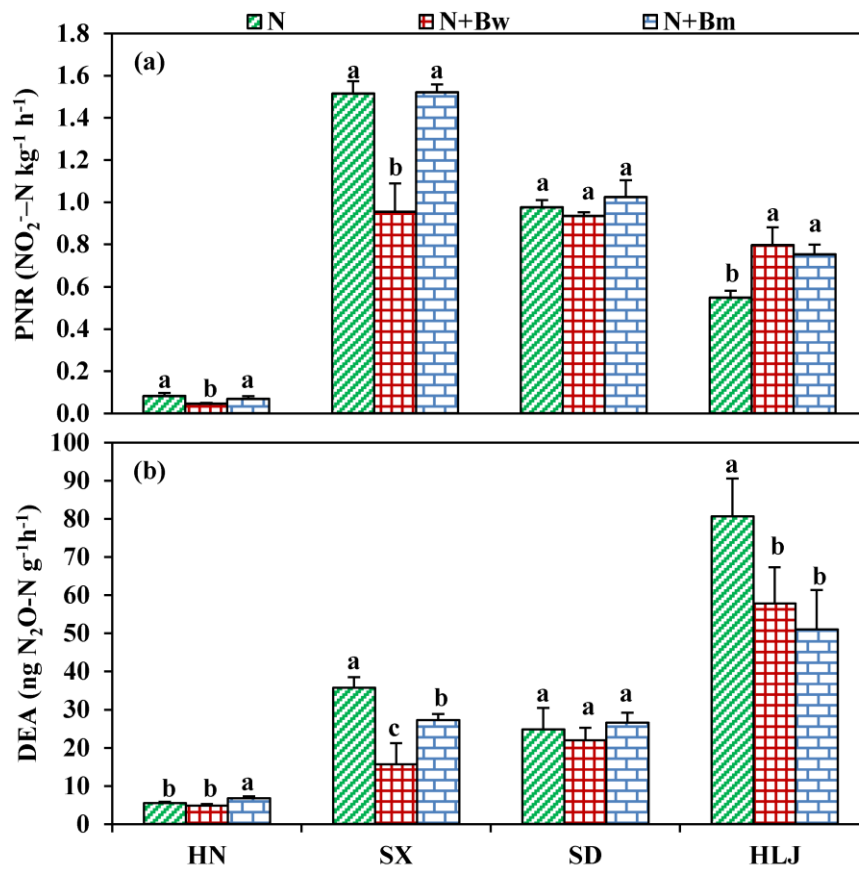

1

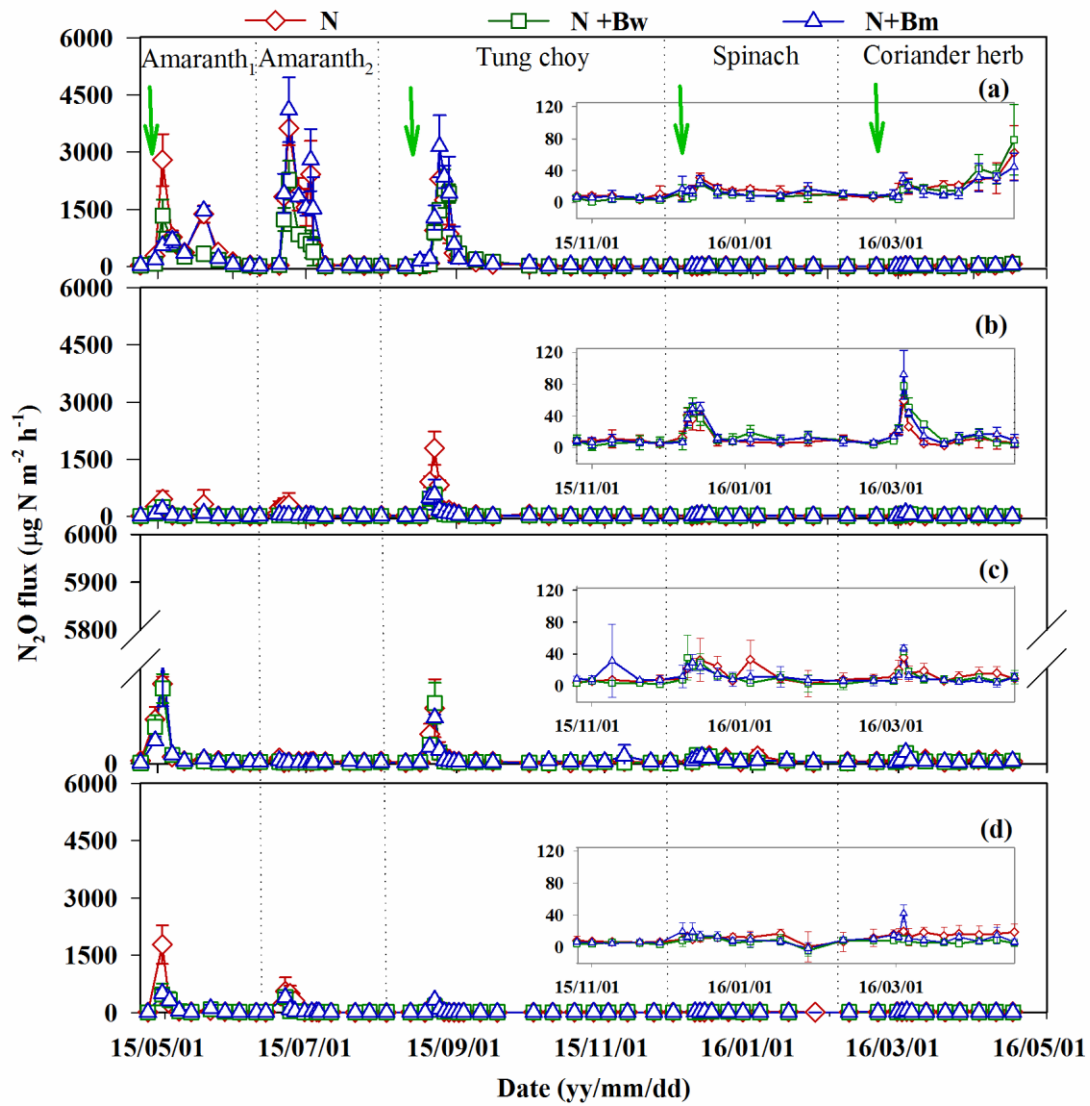

1

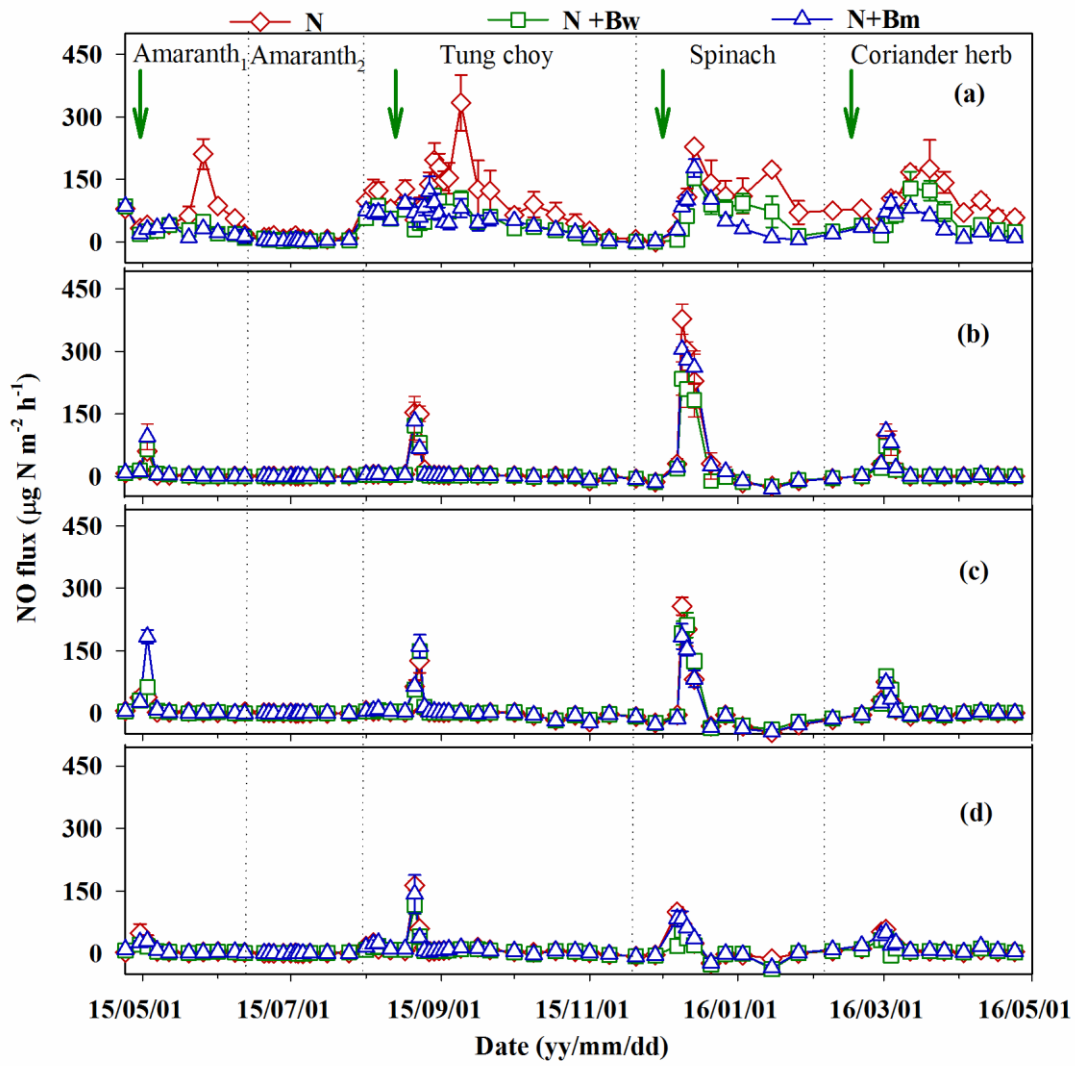

1

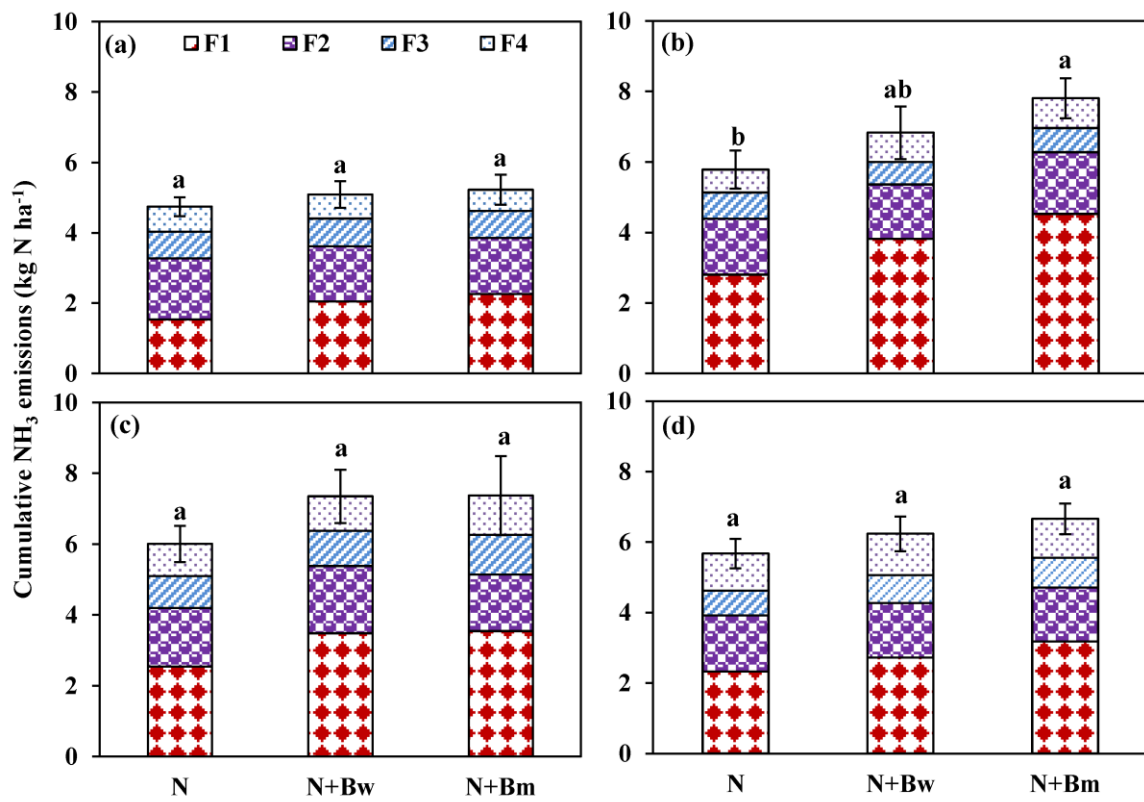

1



1 **Supplementary information**

2 **Fig. S1** Map showing the sampling sites in China.

3 **Fig. S2** Dynamics of water filled pore space (WFPS), air temperature and soil temperature during the vegetable  
4 cultivation period.

5 **Fig. S3** Scanning electron microscope (SEM) images of the biochars derived from Bw (a, b and c) and Bm (d, e and f).

6 Same magnification for a and d ( $\times 50$ ), b and e ( $\times 400$ ) and c and f ( $\times 2000$ ).

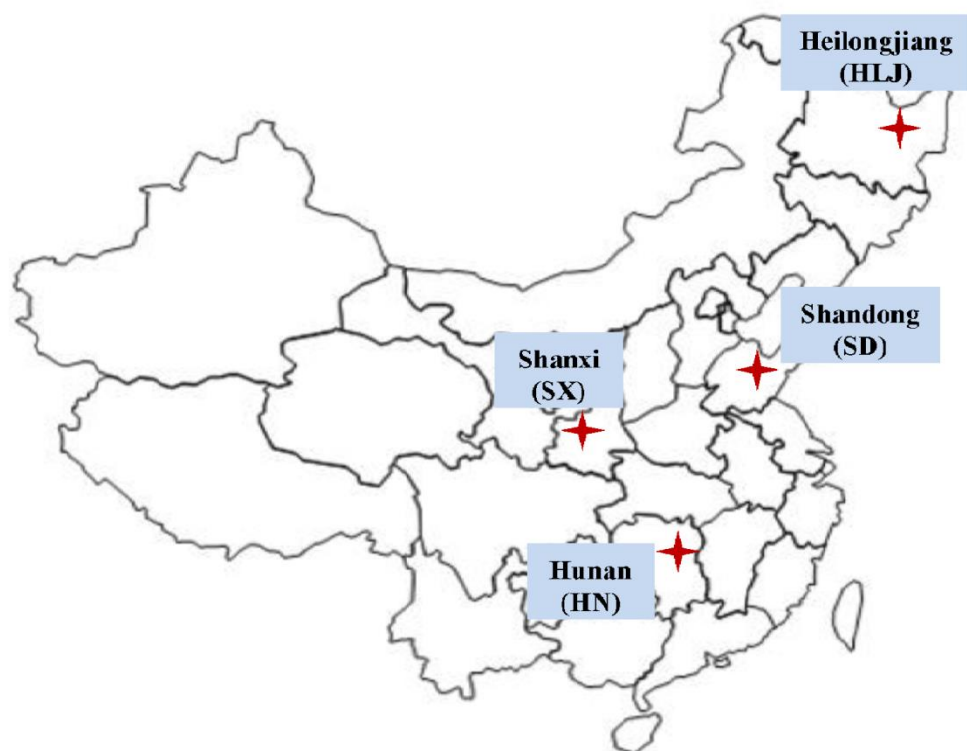

7

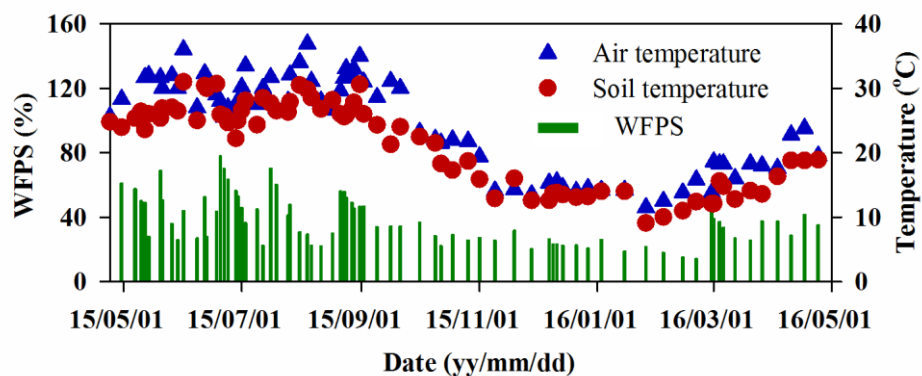

8

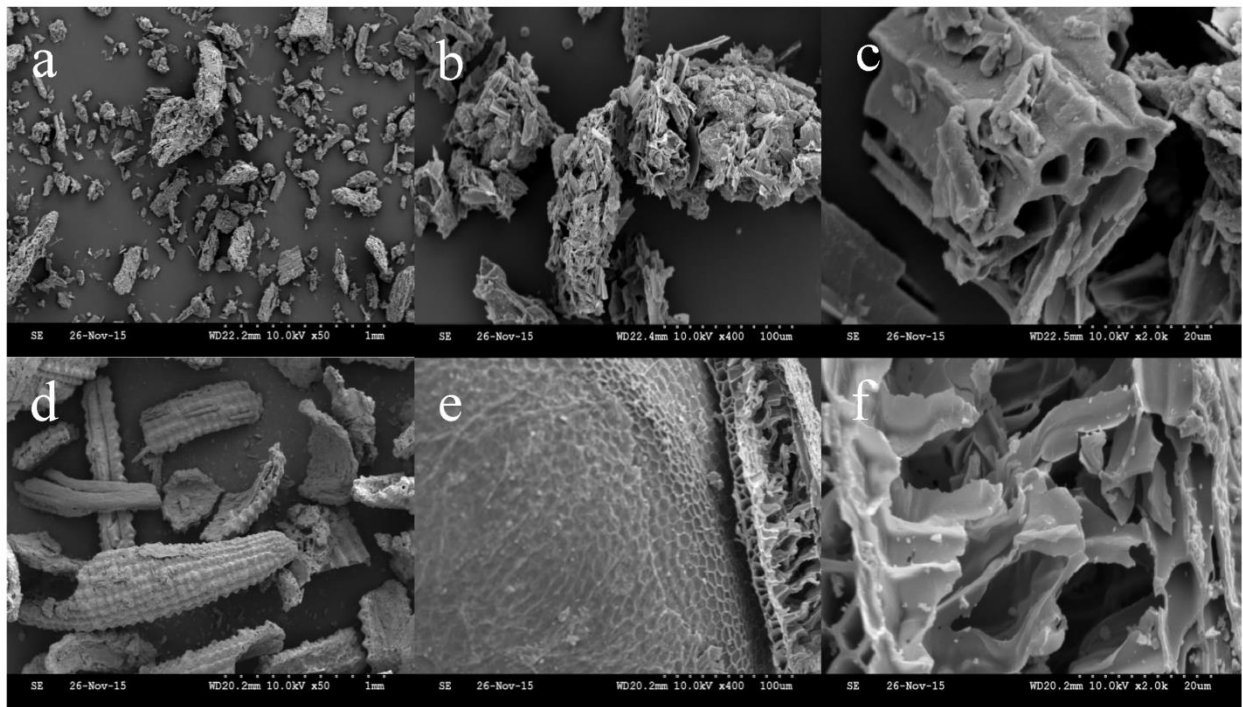

1

1 **Table S1**

2 Characteristics of the vegetable soils and biochars used in the experiment.

| Item                                                   | Vegetable soil |                        |                   |                   | Biochar |       |
|--------------------------------------------------------|----------------|------------------------|-------------------|-------------------|---------|-------|
|                                                        | HN             | SX                     | SD                | HLJ               | Bw      | Bm    |
| Texture                                                | sandy loam     | silt (sandy) clay loam | silt (sandy) loam | silt (sandy) loam |         |       |
| sand, %                                                | 47.1           | 17.7                   | 24.7              | 31.6              |         |       |
| silt, %                                                | 40.0           | 59.6                   | 60.4              | 52.8              |         |       |
| clay, %                                                | 12.9           | 22.7                   | 14.9              | 15.6              |         |       |
| total C (g kg <sup>-1</sup> )                          | 7.6            | 9.8                    | 8.2               | 26.8              | 449.1   | 461.2 |
| total N (g kg <sup>-1</sup> )                          | 1.2            | 1.4                    | 1.0               | 2.1               | 6.5     | 12.0  |
| C/N                                                    | 6.3            | 7.0                    | 8.2               | 12.8              | 69.1    | 38.4  |
| H (g kg <sup>-1</sup> )                                |                |                        |                   |                   | 10.5    | 16.1  |
| O (g kg <sup>-1</sup> )                                |                |                        |                   |                   | 52.4    | 96.7  |
| H/Corg                                                 |                |                        |                   |                   | 0.3     | 0.4   |
| pH                                                     | 5.6            | 7.6                    | 8.2               | 7.6               | 9.7     | 10.0  |
| EC (ds m <sup>-1</sup> )                               | 1.8            | 1.1                    | 0.2               | 0.2               | 10.6    | 3.3   |
| DOC (g kg <sup>-1</sup> )                              | 0.5            | 0.4                    | 0.2               | 0.7               | 0.9     | 1.3   |
| CEC, cmol kg <sup>-1</sup>                             | 6.1            | 13.2                   | 15.3              | 20.3              | 22.1    | 22.7  |
| WHC, %                                                 | 41.6           | 50.1                   | 54.4              | 59.6              | 362.0   | 304.1 |
| NH <sub>4</sub> <sup>+</sup> -N (mg kg <sup>-1</sup> ) | 105.3          | 32.2                   | 28.4              | 31.6              | 4.3     | 4.0   |
| NO <sub>3</sub> <sup>-</sup> -N (mg kg <sup>-1</sup> ) | 415.8          | 307.6                  | 21.2              | 30.8              | 6.1     | 3.2   |
| Bulk density (g cm <sup>-3</sup> )                     | 1.2            | 1.4                    | 1.1               | 1.1               |         |       |
| Surface area (m <sup>2</sup> g <sup>-1</sup> )         |                |                        |                   |                   | 21.3    | 9.3   |
| Ash content, %                                         |                |                        |                   |                   | 29.1    | 38.6  |

3 EC: electronic conductivity; DOC: dissolved organic carbon; CEC: cation exchange capacity; WHC: water holding capacity

**Table S2**

Crop rotation, tillage practices, and fertilizer application from April 2015 to April 2016.

| Crop                  | Date       | Agricultural activity               | Fertilizer N rate (kg N ha <sup>-1</sup> ) | Fertilizer P rate (kg N ha <sup>-1</sup> ) | Fertilizer K rate (kg N ha <sup>-1</sup> ) |
|-----------------------|------------|-------------------------------------|--------------------------------------------|--------------------------------------------|--------------------------------------------|
| Amaranth <sub>1</sub> | 04/22/2015 | Tillage                             |                                            |                                            |                                            |
|                       | 04/29/2015 | Fertilizer application and planting | 240                                        | 240                                        | 240                                        |
|                       | 06/13/2015 | Harvesting                          |                                            |                                            |                                            |
|                       | 06/14/2015 | Tillage                             |                                            |                                            |                                            |
| Amaranth <sub>2</sub> | 06/19/2015 | Fertilizer application and planting | 0                                          | 0                                          | 0                                          |
|                       | 07/31/2015 | Harvesting                          |                                            |                                            |                                            |
|                       | 07/32/2015 | Tillage                             |                                            |                                            |                                            |
| Tung choy             | 08/20/2015 | Fertilizer application and planting | 200                                        | 200                                        | 200                                        |
|                       | 11/27/2015 | Harvesting                          |                                            |                                            |                                            |
|                       | 11/28/2015 | Tillage                             |                                            |                                            |                                            |
| Spinach               | 12/06/2015 | Fertilizer application and planting | 150                                        | 150                                        | 150                                        |
|                       | 01/28/2016 | Harvesting                          |                                            |                                            |                                            |
|                       | 01/09/2016 | Tillage                             |                                            |                                            |                                            |
| Coriander herb        | 02/28/2016 | Fertilizer application and planting | 180                                        | 180                                        | 180                                        |
|                       | 04/29/2016 | Harvesting                          |                                            |                                            |                                            |
|                       | 04/30/2016 | Tillage                             |                                            |                                            |                                            |

1  
2  
3  
4  
5  
6  
7  
8  
9

**Biochar can decrease the gaseous reactive nitrogen intensity in  
intensive vegetable soils across mainland China**~~Effects of two-  
contrasting biochars on gaseous nitrogen emissions and intensity in  
intensive vegetable soils across mainland China~~

Changhua Fan, Hao Chen, Bo Li, Zhengqin Xiong\*

Jiangsu Key Laboratory of Low Carbon Agriculture and GHGs Mitigation, College of Resources and Environmental  
Sciences, Nanjing Agricultural University, Nanjing 210095, China

\*Corresponding author (Z. Xiong): E-mail: zqxiong@njau.edu.cn;

Tel: +86-25-84395148; Fax: +86-25-84395210

1 **Highlights**

- 2 1. Two contrasting biochars affected Gaseous-N<sub>r</sub> Intensity across 4 major vegetable soils in China.
- 3 2. Biochar affects gaseous-N<sub>r</sub> or yield largely depending on soil types.
- 4 3. Both biochars decreased GN<sub>r</sub>I with Bw mitigated gaseous N<sub>r</sub> whereas Bm improved yield.

1 **Abstract**

2 Biochar amendment to soil has been proposed as a strategy for sequestering carbon, mitigating climate change and  
3 enhancing crop productivity, but few studies have demonstrated the general effects of different feedstock-derived  
4 biochars on the various gaseous reactive nitrogen emissions (GN<sub>r</sub>E<sub>s</sub>, N<sub>2</sub>O, NO and NH<sub>3</sub>) simultaneously across the  
5 typical vegetable soils in China. A greenhouse pot experiment with five consecutive vegetable crops was conducted to  
6 investigate the effects of two contrasting biochar, namely, wheat straw biochar (Bw) and swine manure biochar (Bm) on  
7 GN<sub>r</sub>E<sub>s</sub>, vegetable yield and gaseous reactive nitrogen intensity (GN<sub>r</sub>I) in four typical vegetable soils from ~~the main~~  
8 ~~vegetable production regions~~ (Hunan province (HN), Shanxi province (SX), Shandong province (SD) and Heilongjiang  
9 province (HLJ) ~~which~~ ~~that~~ are representative of the intensive vegetable ecosystems across mainland China. Results  
10 showed that remarkable GN<sub>r</sub>E mitigation induced by biochar occurred in SX and HLJ soils, whereas enhancement  
11 of yield occurred in SD and HLJ soils. Additionally, both biochars decreased GN<sub>r</sub>I with Bw performed better than Bm  
12 regarding N<sub>2</sub>O mitigation, with Bw mitigating~~ed~~ N<sub>2</sub>O and NO emissions by 21.8–59.1 % and 37.0–49.5 % (except for  
13 SD), respectively, while Bm improved yield by ~~4.0~~13.5–30.5 % (except for HN and SX). Biochar amendments  
14 generally stimulated the NH<sub>3</sub> emissions with greater enhancement from ~~–~~Bm than Bw. We can infer that ~~Since~~ the  
15 biochar's effects on the GN<sub>r</sub>E<sub>s</sub> and vegetable yield strongly depend~~ed~~ on the attributes of the soil and biochar. Therefore,  
16 both soil type and biochar characteristics should be seriously considered before conducting large-scale application of  
17 biochar in order to achieve the maximum benefits under intensive greenhouse vegetable agriculture.

18 **Keyword:** Biochar, Intensive vegetable soil, Gaseous reactive nitrogen emissions (GN<sub>r</sub>E<sub>s</sub>), Gaseous reactive  
19 nitrogen intensity (GN<sub>r</sub>I)

带格式的: 下标

## 1 **1 Introduction**

2 Agriculture accounted for an estimated emission of 4.1 (1.7–4.8) Tg N yr<sup>-1</sup> for N<sub>2</sub>O and 3.7 Tg N yr<sup>-1</sup> for NO,  
3 contributing 60 % and 10 %, respectively, to the total global anthropogenic emissions, largely due to increases of N  
4 fertilizer application in cropland (Ciais, 2013). The concentration of atmospheric N<sub>2</sub>O, a powerful, long-lived,  
5 greenhouse gas, has increased from 270 parts per billion by volume (ppbv) in the pre-industrial era to ~ 324 ppbv (Ussiri  
6 and Lal, 2013); it has [298-265](#) times the global warming potential (GWP) of CO<sub>2</sub> on a 100-year horizon (IPCC, 2013)  
7 and also causes depletion of the ozone layer in the atmosphere (Ravishankara et al., 2009). In contrast, NO<sub>x</sub>, which is  
8 mainly emitted as nitric oxide (NO), does not directly affect the earth's radiative balance but catalyzes the production of  
9 tropospheric ozone (O<sub>3</sub>), which is a greenhouse gas associated with detrimental effects on human health (Anenberg et al.,  
10 2012) and crop production (Avnery et al., 2011). Additionally, along with the high nitrogen (N) application, ammonia  
11 volatilization is one of the major N loss pathways (Harrison and Webb, 2001) as well, with up to 90% coming from  
12 agricultural activities (Misselbrook et al., 2000; Boyer et al., 2002). As a natural component and a dominant atmospheric  
13 alkaline gas, NH<sub>3</sub> plays an important role in atmospheric chemistry and ambient aerosol formation (Langridge et al.,  
14 2012; Wang et al., 2015b). In addition to nutrient enrichment (eutrophication) of terrestrial and aquatic systems and  
15 global acidification of precipitation, NH<sub>3</sub> has also been shown to be a major factor in the formation of atmospheric  
16 particulate matter and secondary aerosols (Kim et al., 2006; Pinder et al., 2007), leading to potentially adverse effects on  
17 human and ecosystem health such as visibility degradation and threats to biodiversity (Powelson et al., 2008; Behera et al.,  
18 2013). Consequently, the release of various reactive N species results in lower N use efficiency in agricultural systems.

19 In China, vegetable production devotes an area of approximately 24.7 × 10<sup>6</sup> ha, equivalent to 12.4% of the total  
20 available cropping area, and the production represented 52 % of the world vegetable production in 2012 (FAO, 2015).  
21 Intensified vegetable cultivation in China is characterized by high N application rates, high cropping index and frequent  
22 farm practices. Annual nitrogen fertilizer inputs for intensively managed vegetable cultivation in rapidly developing areas  
23 are 3–6 times higher than in cereal grain cultivation in China (Ju et al., 2006; Diao et al., 2013; Wang et al., 2015a). As a  
24 result, great concern exists about excess N fertilizer application, leading to low use efficiency in intensive vegetable  
25 fields in China (Deng et al., 2013; Diao et al., 2013). Meanwhile, intensive vegetable agriculture is considered to be an  
26 important source of N<sub>2</sub>O (Xiong et al., 2006; Jia et al., 2012; Li et al., 2015b; Zhang et al., 2015) and NO production  
27 (Mei et al., 2009). Moreover, ammonia volatilization is another important N pathway in fertilized soil, resulting in large  
28 losses of soil-plant N (Pacholski et al., 2008; Zhang et al., 2011). Therefore, the reduction of reactive N loss becomes a  
29 central environmental challenge to meet the joint challenges of high production and acceptable environmental  
30 consequences in intensive vegetable production (Zhang et al., 2013).



1 Biochar is the dark-colored, carbon (C)-rich residue of pyrolysis or gasification of plant biomass under oxygen  
2 ( $O_2$ )-limited conditions, specifically produced for use as a soil amendment (Sohi, 2012). The amendment of agricultural  
3 ecosystems with biochar has been proposed as an effective countermeasure for climate change (Smith, 2016). These  
4 additions would increase soil carbon storage (Mukherjee and Zimmerman, 2013; Stavi and Lal, 2013), decrease GHG  
5 emissions (Li et al., 2016), and improve soil fertility and crop production (Major et al., 2010; Liu et al., 2013). However,  
6 some recent studies have reported no difference or even an increase in soil  $N_2O$  emissions induced by biochar application  
7 from different soils (Saarnio et al., 2013; Wang et al., 2015a). Still,  $NH_3$  volatilization was enhanced by biochar  
8 application in pasture soil (Clough et al., 2010), vegetable soil (Sun et al., 2014) and paddy soil in the wheat-growing  
9 season (Zhao et al., 2014). Additionally, crop productivity responses to biochar amendments differed among various  
10 biochars (Cayuela et al., 2014). These inconsistent results suggest that current biochar application to soil is not a  
11 “one-size fit-all paradigm” because of the variation in the physical and chemical characteristics of the different biochars,  
12 soil types and crop species (Field et al., 2013; Cayuela et al., 2014). Moreover, limited types of biochar (Spokas and  
13 Reicosky, 2009) and soil (Sun et al., 2014) were involved in the experiments in previous studies. Thus, the evaluation of  
14 the different types of biochar under the typical soils is imperative to gain a comprehensive understanding of potential  
15 interactions before the large-scale application of biochars in intensive vegetable cropping system in China.

16 Therefore, a greenhouse pot experiment was conducted in an effort to investigate the effects of different types of  
17 biochar on gaseous **reactive** nitrogen emissions ( $GN_rEs$ ), namely,  $N_2O$ ,  $NO$  and  $NH_3$ , simultaneously in four typical  
18 intensified vegetable soils across main vegetable production areas of mainland China. Overall, the objectives of this  
19 research were to gain a comprehensive insight into the effects of the different types of biochar on the  $GN_rEs$ , vegetable  
20 yield and gaseous **reactive** nitrogen intensity ( $GN_rI$ ) in intensively managed vegetable production in China.

## 1 2 Materials and methods

### 2 2.1. Experimental soil and biochar

3 Four typical greenhouse vegetable cultivation sites with a long history (more than 10 years) of conventional  
4 cultivation were selected from Northeast, Northwest, Central and Eastern China (Fig. S1), namely, Phaeozem, Anthrosol,  
5 Acrisol and Cambisol (FAO and ISRIC, 2012) from Jiamusi (46°48' N, 130°12' E), Heilongjiang province (HLJ);  
6 Yangling (34°18' N, 108°2' E), Shanxi province (SX); Changsha (28°32' N, 113°23' E), Hunan province (HN) and  
7 Shouguang (36°56' N, 118°38' E), Shandong province (SD), respectively were collected and represented a range of  
8 differences in physicochemical properties and regions (Table S1). Soil samples were manually collected from the  
9 cultivated layer (0–20 cm) after the local vegetable harvest in April, 2015. The samples were air-dried and passed through  
10 a 5 mm stainless steel mesh sieve and homogenized thoroughly. Any visible roots and organic residues were removed  
11 manually before being packed with the necessary amount of soil to achieve the initial field bulk density. Each pot  
12 received 15 kg of 105 °C dry-weight-equivalent fresh soil. For each of the biochar amendment pots, 282.6 g pot<sup>-1</sup> sieved  
13 biochar (2 mm) was mixed with the soil thoroughly before the experiment, which was equivalent to a 40 t ha<sup>-1</sup> biochar  
14 dose (dry weight). No more biochar was added later in the experimental period.

15 Two types of biochar, derived from two common agricultural wastes in China: wheat straw and swine manure,  
16 hereafter referred to as Bw and Bm, respectively (Table S1). The Bw was produced at the Sanli New Energy Company in  
17 Henan, China, by pyrolysis and thermal decomposition at 400–500 °C. The Bm was produced through thermal  
18 decomposition at 400 °C by the State Key Laboratory of Soil Science and Sustainable Agricultural, Institute of Soil  
19 Science, Chinese Academy of Sciences. In accordance with Lu (2000), the SOC was measured by wet digestion with  
20 H<sub>2</sub>SO<sub>4</sub>–K<sub>2</sub>Cr<sub>2</sub>O<sub>7</sub>, TN was determined by semi-micro Kjeldahl digestion, and soil texture was determined with the pipette  
21 method. The soil pH and biochar pH were measured in deionized water at a volume ratio of 1:2.5 (soil to water) with a  
22 PHS-3C mv/pH detector (Shanghai Kangyi Inc. China). Biochar content of hydrogen (H) was measured by elemental  
23 analysis after dry combustion (Euro EA, Hekatech GmbH, Wegberg, Germany). The oxygen content of biochar was  
24 measured with the same device after pyrolysis of the sample at 1000 °C followed by reduction of the evolved O<sub>2</sub> to CO  
25 and quantification by GC-TCD. The soil NO<sub>3</sub><sup>-</sup>-N and NH<sub>4</sub><sup>+</sup>-N were measured following the two-wavelength ultraviolet  
26 spectrometry and indophenol blue methods, respectively, using an ultraviolet spectrophotometer (HITACHI, UV-2900,  
27 Tokyo, Japan). Electric conductivity (EC) was measured by using a Mettler-Toledo instrument (FE30-K, Shanghai, China)  
28 at a 1:5 (w:v) soil to water ratio. Cation exchange capacity (CEC) was determined using the CH<sub>3</sub>COONH<sub>4</sub> method.  
29 Dissolved organic carbon (DOC) was extracted from 5 g of the biochar/soil with an addition of 50 ml deionized water  
30 and measured by a TOC analyzer (TOC-2000/3000, Metash Instruments Co., LTD, Shanghai, China). Ash content was

1 measured by heating the biochars at 750 °C for 4 h. The specific surface area of the biochar material was tested using the  
2 Brunauer–Emmett–Teller (BET) method, from which the N adsorption–desorption isotherms at 77 K were measured by  
3 an automated gas adsorption analyzer ASAP2000 (Micromeritics, Norcross, GA) with + 5% accuracy. Scanning electron  
4 microscopy (SEM) imaging analysis was conducted using a HITACHI S-3000N scanning electron microscope.

## 5 2.2. *Experimental set-up and management*

6 The pot experiments were performed at the greenhouse experimental station of Nanjing Agricultural University,  
7 China. Five vegetable crops were grown successively in the four vegetable soils during the experimental period. For each  
8 type of soil, three treatments with three replicates were arranged in a ~~completely~~-random design: urea without biochar  
9 (N), urea with wheat straw biochar (N+Bw), urea with swine manure biochar (N+Bm). In addition, phosphate and  
10 potassium fertilizers in the form of calcium magnesium phosphate and potassium chloride, together with urea, were  
11 broadcasted and mixed with soil thoroughly prior to sowing the vegetables. No topdressing events occurred because of  
12 the frequent cultivation and short growth period for the leafy vegetables. Based on the vegetable growth, all pots received  
13 equal amounts of water and no precipitation. Detailed information on the pot management practices is provided in Table  
14 S2.

15 Each pot consists of a 30 cm × 30 cm (height × diameter) cylinder made of polyvinyl chloride (PVC). The top of  
16 each pot was surrounded by a special water-filled trough collar, which allowed a chamber to sit on the pot and prevent  
17 gas exchange during the gas-sampling period. Small holes (diameter of 1 cm) at the bottom of the pots were designed for  
18 drainage. To prevent soil loss, a fine nylon mesh (< 0.5 mm) was attached to the base of the soil cores before packing.

## 19 2.3. *Measurement of N<sub>2</sub>O, NO and NH<sub>3</sub>*

20 The NO and N<sub>2</sub>O fluxes were measured simultaneously from each vegetable cultivation using a static opaque  
21 chamber method (Zheng et al., 2008; Yao et al., 2009). A square PVC chamber of 35 cm × 35 cm × 40 cm (length ×  
22 width × height) was temporarily mounted on the pot for gas flux measurement. The chamber was coated with sponge and  
23 aluminum foil outside to prevent solar radiation heating the chamber. Gas samples for flux measurements were collected  
24 between 8 and 10 a.m. on each measuring day to minimize the influence of diurnal temperature variation. Gas fluxes  
25 were usually measured once a week and every other day for one week following fertilizer application. To measure the  
26 N<sub>2</sub>O flux, four samples were collected from the headspace chamber using 20 ml polypropylene syringes at 0, 10, 20, and  
27 30 min after chamber closure. The gas concentrations in the samples were analyzed within 12 h after sampling using an  
28 Agilent 7890A gas chromatograph equipped with an electron capture detector (ECD) for N<sub>2</sub>O detection. The carrier gas  
29 was argon-methane (50 %) at a flow rate of 40 ml min<sup>-1</sup>. The column and ECD temperatures were maintained at 40 and  
30 300 °C, respectively. The gas chromatography configurations described by Wang et al. (2013) were adopted for the gas

1 concentration analysis. N<sub>2</sub>O flux was calculated using the linear increases in gas concentration with time. Sample sets  
2 were rejected unless they yielded a linear regression value of R<sup>2</sup> > 0.90.

3 For each NO flux measurement, gas samples were collected from the same chamber that was used for the N<sub>2</sub>O flux  
4 measurements (Yao et al., 2009). Before closing the chamber, an approximately 1.0 L gas sample from the headspace of  
5 each chamber was extracted into an evacuated sampling bag (Delin Gas Packing Co., LTD, Dalian, China), and this  
6 measurement was regarded as time 0 min for NO analysis. After 30 min under chamber enclosure conditions (i.e., after  
7 the N<sub>2</sub>O sample collections were completed), another headspace gas sample with the same volume was extracted from  
8 each chamber into another evacuated bag. Within 1 h after sampling, NO concentrations were analyzed by a model 42i  
9 chemiluminescence NO–NO–NO<sub>x</sub> analyzer (Thermo Environmental Instruments Inc., Franklin, MA, USA). The NO  
10 fluxes were derived from the concentration differences between the two collected samples. The NO<sub>x</sub> analyzer was  
11 calibrated by a model 146i dynamic dilution calibrator system at the end of each crop-growing season.

12 The mean flux of N<sub>2</sub>O or NO during the experiment period was calculated as the average of all measured fluxes,  
13 which were weighted by the interval between the two measurements (Xiong et al., 2006). The cumulative N<sub>2</sub>O was  
14 calculated as the product of the mean flux and the entire duration.

15 The NH<sub>3</sub> volatilization was determined using the ventilation method (Zhao et al., 2010). The  
16 phosphoglycerol-soaked sponge was replaced every day after each fertilization event for approximately one week. The  
17 phosphoglycerol-soaked sponges used to collect the NH<sub>3</sub> samples were immediately extracted with 300 mL potassium  
18 chloride (KCl) solution (1 mol L<sup>-1</sup>) for 1 h. The concentration of ammonia nitrogen (NH<sub>4</sub><sup>+</sup>-N) was measured using the  
19 indophenol blue method at 625 nm (Sororzano, 1969) by ultraviolet spectrophotometry (HITACHI, UV-2900, Tokyo,  
20 Japan, with 0.005 absorbance of photometric accuracy). The cumulative seasonal NH<sub>3</sub> volatilization was the sum of the  
21 daily emissions during the measurement period.

#### 22 2.4. Auxiliary measurements

23 Simultaneously with the determination of trace gas fluxes, the air temperature and the soil temperature at a depth of  
24 5 cm were measured using thermally sensitive probes at each sampling date. Soil water content was also measured using  
25 a portable water detector (Mode TZS-1K, Zhejiang Top Instrument Corporation Ltd., China) by the frequency domain  
26 reflectometer method at a depth of 5 cm. Measured soil water contents (v/v) were converted to water filled pore space  
27 (WFPS) with the following equation:

$$28 \text{ WFPS} = \text{volumetric water content (cm}^3 \text{ cm}^{-3}\text{)} / \text{total soil porosity (cm}^3 \text{ cm}^{-3}\text{)} \quad (1)$$

29 Here, total soil porosity = [1 - (soil bulk density (g cm<sup>-3</sup>) / 2.65)] with an assumed soil particle density of 2.65 (g cm<sup>-3</sup>).

30 The total soil bulk density was determined with the cutting ring method according to Lu (2000).

1 After each vegetable crop reached physiological maturity, the fresh vegetable yield was measured by weighing the  
2 whole aboveground and belowground biomass in each pot.

$$3 \text{GNrE} = \text{cumulative N}_2\text{O} + \text{cumulative NO} + \text{cumulative NH}_3 \text{ emissions (kg N ha}^{-1}\text{)} \quad (2)$$

$$4 \text{GNrI} = \text{GNrE} / \text{vegetable fresh yield (kg N t}^{-1} \text{ yield)} \quad -(3)$$

5 After the one-year pot experiment, a soil sample from each pot was blended carefully. One subsample was stored at  
6 4 °C for determination of microbial biomass carbon (MBC), potential nitrification rate (PNR) and denitrification enzyme  
7 activity (DEA) within 3 days. Another subsample was air-dried for analysis of SOC, TN, pH and EC. MBC was  
8 determined by substrate-induced respiration using a gas chromatography (Anderson and Domsch 1978). PNR was  
9 measured using the chlorate inhibition soil-slurry method as previously described (Kurola et al., 2005) with  
10 modifications (Hu et al., 2016). DEA was quantified as described by Smith and Tiedje (1979).

#### 11 2.5. Data processing and statistics

12 One-way ANOVA was performed to test the effects of the treatments on cumulative N<sub>2</sub>O, NO and NH<sub>3</sub> emissions;  
13 GNrE; vegetable yield and GNrI. Two-way ANOVA was used to analyze the effects of the biochar type; soil type; and  
14 their interactions on N<sub>2</sub>O, NO and NH<sub>3</sub> emissions, vegetable yield, GNrE and GNrI throughout the experimental period.  
15 Multiple comparisons among the treatments were further explained using Tukey's HSD test. Significant differences were  
16 considered at  $P < 0.05$ . All statistical analyses were performed using JMP ver. 7.0 (SAS Institute, Cary, NC, USA, 2007).  
17 Pearson's correlation analysis was used to determine whether there were significant interrelationships between N<sub>2</sub>O/NO  
18 and PNR or DEA in each soil, using SPSS window version 18.0 (SPSS Inc., Chicago, USA).

### 1 3. Results

#### 2 3.1. Soil responses to biochar amendment

3 Obvious differences in all observed soil properties existed among soil types (Table 1,  $p < 0.001$ ), suggesting the  
4 wide variations of soil characters across mainland China. Additionally, biochar amendments had significant influences on  
5 all the soil properties (Table 1,  $p < 0.05$ ). Compared with N treatments, biochar amendments increased the SOC, TN and  
6 EC by 20.4–135.0 %, 0.5–21.2 % and 2.4–38.1 %, respectively, across all the soils. Compared with Bw, Bm amendment  
7 resulted in higher contents of SOC and TN by 5.8–20.5 % and 9.5–14.2 %, respectively, whereas EC values were higher  
8 by 3.3–21.5 % induced by Bw than Bm amendment over all soils. Additionally, biochar amendments significantly  
9 ~~increased~~enhanced soil pH by 0.27–0.64 and 0.08–0.10 units compared with N treatment in HN and SX soils ( $p < 0.05$ ),  
10 respectively, and higher values were detected with Bm than Bw amendment in all soils. Furthermore, biochar  
11 amendments tended to increase MBC in SD and HLJ soils, and Bm performed better in MBC enhancements than Bw in  
12 all soils.

13 As shown in Fig. 1, no consensus effects on PNR and DEA were observed with biochar amendments across all soils.  
14 Compared with N treatment, biochar amendments significantly increased PNR in HLJ while exerted no influences on SD  
15 soil (Fig. 1a). Compared with Bw, Bm amendment significantly increased PNR in HN and SX soils. Moreover, compared  
16 with N, biochar amendments ~~significantly~~reduced DEA ~~in most soils, significantly in SX and HLJ~~ by an average of 40.1  
17 and 37.8 % ~~in SX and HLJ (Fig. 1b,  $p < 0.05$ ), respectively, while producing no influence in SD soils (Fig. 1b)~~. In  
18 comparison with Bw, remarkable enhancements ~~in DEA~~ were observed by 42.5 and 74.4 % with Bm amendment in HN  
19 and SX soils, respectively ( $p < 0.05$ ).

#### 20 3.2. Seasonal variations of $N_2O$ and NO emissions

21 The dynamics of  $N_2O$  fluxes from all N-applied treatments in the four vegetable soils were relatively consistent and  
22 followed a sporadic and pulse-like pattern that was accompanied with fertilization, tillage and irrigation (Fig. 2). In  
23 addition, peak  $N_2O$  fluxes varied greatly. Most of the  $N_2O$  emissions occurred during the Amaranth and Tung choy  
24 growing periods, and there were several small emissions peaks during the Spinach and Coriander herb growing periods  
25 due to lower N application rate (Table S2), soil temperature and water content (Fig. S2). The highest peaks of  $N_2O$   
26 emissions from HN, SX, SD and HLJ were 4133.7, 1784.0, 432.4 and 1777.2  $\mu\text{g N m}^{-2} \text{h}^{-1}$ , respectively. Although  
27 biochar (Bw and Bm) application did not significantly alter the seasonal pattern of the  $N_2O$  fluxes, they greatly lowered  
28 some peaks of  $N_2O$  emissions in the SX and HLJ vegetable soils (Fig. 2b and d).

29 Clearly, the NO fluxes demonstrated similar seasonal dynamics to the  $N_2O$  fluxes (Fig. 3). Some relatively high  
30 peak NO fluxes were still observed in the Spinach and Coriander herb planting seasons even though relatively low

1 temperatures occurred during these periods, primarily due to lower soil moisture which was suitable for NO production.  
2 The NO fluxes ranged from -44.6 to 377.6  $\mu\text{g N m}^{-2} \text{h}^{-1}$  across all soil types. Furthermore, some NO peaks were  
3 significantly weakened with the Bw and Bm in the HN soil (Fig. 3a).

### 4 3.3. Cumulative $\text{N}_2\text{O}$ , NO and $\text{NH}_3$ emissions

5 Cumulative  $\text{N}_2\text{O}$  emissions varied greatly among soil types (Table 2,  $p < 0.001$ ), from 1.97 to 31.56  $\text{kg N ha}^{-1}$  across  
6 all the soils during the vegetable cultivation period (Table 3a). Biochar amendments had significant influences on the  
7 cumulative  $\text{N}_2\text{O}$  emissions, reducing  $\text{N}_2\text{O}$  emissions by 13.7–41.6 % (Table 2). In comparison with the N treatment,  
8 biochar amendment ~~resulted in no consistent effects on  $\text{N}_2\text{O}$  emissions over all soils, decreased  $\text{N}_2\text{O}$  emissions by an~~  
9 ~~average of 56.4 % and 47.5 % in SX and HLJ (Table 3a,  $p < 0.05$ ), respectively, with no remarkable influence in SD soil,~~  
10 indicating significant interactions between biochar and soil types (Table 2,  $p < 0.001$ ). ~~Additionally, Compared with Bm,~~  
11 Bw amendment performed better mitigation effects which decreased  $\text{N}_2\text{O}$  emissions by 11.8–38.4 % across all the soils,  
12 significantly in HN soil in relation to Bm (Table 3a,  $p < 0.05$ ). ~~In comparison with  $\text{N}_2\text{O}$  emission, the values of~~  
13 ~~cumulative NO emissions~~ was were much smaller than those of  $\text{N}_2\text{O}$  emissions, with a remarkable variation of 0.20–8.99  
14  $\text{kg N ha}^{-1}$  across all soils (Table 3b). Though pronounced effects on NO emissions with a reduction by average of 45.8 %  
15 (Table 2,  $p < 0.05$ ), biochar amendments had no consensus effects across soils, ~~reducing NO emissions in HN soil~~ (Table  
16 ~~3b,  $p < 0.05$ ) and producing no remarkable influence on SD soil,~~ which suggested significant interactions between  
17 biochar and soil types (Table 2,  $p < 0.001$ ). Compared with Bm, Bw amendment significantly reduced NO emissions in  
18 SX and HLJ soils (Table 3b,  $p < 0.05$ ). Moreover, As shown in Table 4,  $\text{N}_2\text{O}$  emissions had positive relationships with  
19 DEA both in SX and HLJ soils, and were affected positively withby PNR in HN soil (Table 4). Additionally, NO  
20 emissions had positive correlations with both PNR and DEA in SX soil. However, neither  $\text{N}_2\text{O}$  nor NO emissions were  
21 influenced significantly by PNR and DEA in SD soils.

22 As is shown in Table 3c, the cumulative  $\text{NH}_3$  emissions fluctuated greatly from 4.72–7.57  $\text{kg N ha}^{-1}$  across all the  
23 soils. Though significantly enhancing  $\text{NH}_3$  emissions (Table 2), biochar amendments produced no significant influences  
24 on the  $\text{NH}_3$  emissions relative to N treatment in most soils (Table 3c). A tendency was found for the cumulative  $\text{NH}_3$   
25 emissions in N+Bm to be higher than those in the N+Bw treatment, although this difference was not remarkable within  
26 each soil. Additionally, stimulation effects were consistently present after the first fertilization event in each type of soil  
27 (Fig. 4).

### 28 3.4. Vegetable yield and gaseous reactive N emissions intensity during the five-vegetable crop rotation

29 The vegetable yields for the five consecutive vegetable crops are presented in Table 3e. Pronounced differences  
30 existed among all soils (Table 2,  $p < 0.001$ ). Biochar amendments exerted no significant effects on vegetable yield (Table

带格式的：突出显示

1 2). Compared with the N treatment, biochar amendments were prone to increase vegetable yield in SD and HLJ soils  
2 against HN and SX soils (Tables 3e), denoting pronounced interactions between soil and biochar (Table 2,  $p < 0.05$ ).  
3 Compared with Bm, Bw amendment lowered total yield over all the soils (Table 3e), significantly in HN and SD soils ( $p <$   
4  $0.05$ ).

5 Table 3f presents the GNrI during the whole experiment period, with a pronounced variation among soils (Table 2,  $p$   
6  $< 0.001$ ). The GNrI was greatly affected by biochar amendment during the whole experiment period (Table 2,  $p < 0.01$ ).  
7 Compared to N treatment, biochar amendments reduced the GNrI by 4.3–27.8 % across all soils, significantly in SX and  
8 HLJ soils (Table 3f,  $p < 0.05$ ). Moreover, there were no remarkable differences between Bw and Bm throughout all soils.



## 4. Discussion

### 4.1. Biochar effects on $GN_2Es$ across different soil types

The effects of biochar amendment on the  $N_2O$  and NO emissions may be positive, negative or neutral, largely depending on the soil condition and the inherent characteristics of the biochar (Spokas and Reicosky, 2009; Nelissen et al., 2014). In our study, effects of two biochars on the  $N_2O$  and NO emissions did not follow a consensus trend across the four typical vegetable soils (Table 3a, b). In agreement with Cayuela et al. (2014), who reported that the role of biochar in mitigating  $N_2O$  emission was maximal in soils close to neutrality, remarkable mitigation effects were observed in SX and HLJ with the biochar amendments (Table 3a). These findings potentially resulted from the effects of the biochars on soil aeration, C/N ratio and pH, which affected the N dynamics and N cycling processes (Zhang et al., 2010; Ameloot et al., 2015). ~~Moreover, mitigation of  $N_2O$  emissions induced by biochar was probably due to the decreased denitrification in SX and HLJ soils (Fig.1b and Table 4).~~ In line with Obia et al. (2015), biochar decreased NO emissions in low-pH HN soil (Table 3b), probably by inducing denitrification enzymes with higher activity, and then resulted in less NO accumulation relative to  $N_2$  production. Moreover, the liming effects of biochar prevented the chemical decomposition of  $NO_2^-$  to NO (Islam et al., 2008), leaving only enzymatically produced NO to accumulate. However, neither  $N_2O$  nor NO emission was significantly influenced by PNR or DEA, suggesting other processes might play vital roles in SD soil. Besides nitrification and denitrification, nitrifier~~s~~ denitrification (Wrage et al., 2001) and heterotrophic nitrification (Zhu et al., 2011) can be important processes for producing  $N_2O$  and NO as well, especially in vegetable soils with low pH, low carbon content and high N content (Wrage et al., 2001). Ma et al. (2015) indicated that nitrifier denitrification might be the main process producing  $N_2O$  in the North China Plain. In addition, surplus N input in vegetable systems probably masked the beneficial effects of the biochar addition on the N transformation (Wang et al., 2015a). Therefore, the underlying mechanism of how biochar affect those processes needs to be illustrated in the further research.

On the other hand, different biochars may not produce universal influences on  $N_2O$  emissions for the same soil due to the distinct properties of the biochar (Spokas and Reicosky, 2009). In the current study, overall, in comparison with Bm, the Bw amendment had more effective mitigation effects on  $N_2O$  and NO emissions (Table 3a, b), largely due to the following reasons. First, compared with Bw, the contents of the TN and DOC in Bm were 1.8- and 1.4-fold (Table S1), respectively, which might supply extra N or C source for heterotrophic nitrification in the acidic HN soil, which made Bm ineffective for reducing the  $N_2O$  emissions (Table 3a). This result was in accordance with Li et al. (2015a), who observed that biochar amendment had no significant influence on the cumulative  $N_2O$  emissions, and even higher  $N_2O$  emissions occurred when biochar was input. Additionally, as shown in Fig.1, Bm was more prone to stimulate PNR and

1 DEA, thus displaying lower mitigation ability than Bw. Second, compared with Bm, the C/N ratio was approximately  
2 twofold in Bw (Table S1), presumably leading to more inorganic nitrogen being immobilized in biochar with a higher  
3 C/N ratio (Ameloot et al., 2015), decreasing the available N for microorganisms. Last, as presented in Fig. S3 and Table  
4 S1, Bw had more pores and surface area, having a better advantage over Bm in absorbing NO accordingly. Others have  
5 found that the lower mitigation capacity of high-N biochars (e.g., manures or biosolids) is probably due to the increased  
6 N release in the soil from the biochar (Schouten et al., 2012). To our knowledge, very few studies have investigated  
7 biochar effects on NO emissions (Nelissen et al., 2014; Obia et al., 2015), and the mechanisms through which biochar  
8 influence NO emissions are not elucidated yet. Therefore, more research is needed to clarify the underlying mechanisms  
9 of biochar on NO emission.

10 Intensive managed soils receiving fertilizer such as urea or anhydrous NH<sub>3</sub> and ruminant urine patches are potential  
11 hot spots for NH<sub>3</sub> formation, where the use of biochar is expected to retain NH<sub>3</sub>-N in the soil system (Clough and  
12 Condon, 2010). Actually, the effects of biochar amendments on NH<sub>3</sub> volatilization largely depend on soil characteristics,  
13 biochar types and duration time. Soil texture is an important factor impacting NH<sub>3</sub> transfer and release. More clay  
14 contents were present in the SX soil (Table S1), which was limited in large soil pores, thus, the addition of porous  
15 biochar could enhance the soil aeration, promoting NH<sub>3</sub> volatilization (Sun et al., 2014). Additionally, it was worthy to  
16 note that cumulative NH<sub>3</sub> emissions were slightly higher in soils with the Bm than those with the Bw amendment (Fig. 4  
17 and Table 3c) and that difference could presumably be attributed to less surface area and the much higher pH of Bm (Fig.  
18 S3 and Table S1), resulting in weak adsorption and great liming effects. ~~Overall, compared with previous studies (Re et~~  
19 ~~al., 2015; Mandal et al., 2016), no significant reductions were found in cumulative NH<sub>3</sub> volatilizations over the whole~~  
20 ~~observation period when biochar was added to current vegetable soils. In general, freshly produced biochar typically has~~  
21 ~~very low ability to absorb ammonium (Yao et al., 2012). Over time, biochar surfaces are oxidized and increase adsorption~~  
22 ~~(Wang et al., 2016). Moreover, the recorded increase in CEC by Cheng et al. (2006) indicated that biochars that are~~  
23 ~~sufficiently weathered over a period would increase their ability to retain cations such as NH<sub>4</sub><sup>+</sup>-N. Further, relatively~~  
24 ~~long term experiments are required to elucidate the mechanism and duration of effect.~~

#### 25 4.2. Biochar effects on vegetable yield and GN<sub>r</sub>I across different soil types

26 The application of biochar is usually intended to increase crop yields, and evidence suggests this may be successful  
27 (Schulz et al., 2013; Li et al., 2016). Due to its liming effect, biochar helps to improve the supply of essential macro- and  
28 micronutrients for plant growth (Chan and Xu, 2009; Major et al., 2010). Enhancement of vegetable yield with biochar  
29 amendment occurred in SD and HLJ soils (Table 3e). ~~Additionally, the effects of Bm and Bw on vegetable yield were~~  
30 ~~mixed inconsistent, which probably due to performance of biochars as an amendment is related to the wide diversity of~~

1 physicochemical characteristics of biochar that translates into variable reactions in soil (Novak et al., 2014). First,  
2 compared to Bw, more DOC content was in the Bm has a higher DOC content (Table S1), through which more nutrients  
3 may be directly introduced to the soil (Rajkovich et al., 2012). In addition, Secondly, besides their large amount of  
4 plant-available nutrients (Hass et al., 2012), manure biochars produced with manure have been generally considered  
5 significant for improving soil fertility by promoting soil structure development (Joseph et al., 2010), with the result that  
6 Bm was found superior to Bw in vegetable production enhancement in our case (Table 3e). As biochar effects on  
7 vegetable yield were variable, both biochar properties and soil conditions and crop species ought to be taken into account  
8 comprehensively before applying biochar to a certain soil condition.

9 However, no promotion of yield was observed with biochar amendments in HN and SX. This could be attributed to  
10 exacerbated soil salinity, which inhibited the uptake of nutrients and water (Ju et al., 2006; Zhou et al., 2010) and the  
11 growth of the soil microorganisms (Setia et al., 2011), leading to unsustainable greenhouse vegetable production.  
12 Compared with other biochar (Jia et al., 2012), the higher amounts of ash in Bw and Bm may contain high salts causing  
13 soil salinity (Hussain et al., 2016). After the addition of the two salt-rich biochars, the EC values of HN and SX vegetable  
14 soils increased and reached the limits to tolerance for the leafy vegetables (Shannon and Grieve, 1998). ~~Additionally, the~~  
15 ~~mixed performance of biochars as an amendment is related to the wide diversity of physicochemical characteristics that~~  
16 ~~translates into variable reactions in soil (Novak et al., 2014). First, compared to Bw, more DOC content was in the Bm~~  
17 ~~(Table S1), through which more nutrients may be directly introduced to the soil (Rajkovich et al., 2012). In addition,~~  
18 ~~besides their large amount of plant available nutrients (Hass et al., 2012), manure biochars have been generally~~  
19 ~~considered significant for improving soil fertility by promoting soil structure development (Joseph et al., 2010), with the~~  
20 ~~result that Bm was found superior to Bw in vegetable production enhancement (Table 3e). As biochar effects on~~  
21 ~~vegetable yield were variable, both biochar properties and soil conditions and crop species ought to be taken into account~~  
22 ~~comprehensively before applying biochar to a certain soil condition.~~

23 Here, we assessed two feedstock-derived biochar effects on GN<sub>r</sub>I in typical cultivated vegetable soils across  
24 mainland China. Overall, biochar amendments reduced GN<sub>r</sub>I over all the soils, with the magnitude largely depending on  
25 soil type. Remarkable reduction in GN<sub>r</sub>I had been detected due to the efficient mitigation induced by biochar in SX and  
26 HLJ (Table 3f). However, despite enhanced vegetable yield, no significant decreases in GN<sub>r</sub>I were observed in SD,  
27 mainly because of the absence of mitigation effects on N<sub>2</sub>O, NO and NH<sub>3</sub> emissions of biochars (Table 3a, b and c)  
28 ~~Additionally Overall, divergent influences on GNE and yield were determined with different biochars that Bw was~~  
29 ~~superior to Bm in mitigating the GN<sub>r</sub>E while Bm performed better in vegetable yield enhancement (Table 3d and e). ;~~  
30 Therefore, mitigation efficacys on GN<sub>r</sub>I were not notably different between Bw and Bm amendments across the four

1 soils, largely due to the divergent influences on GNE and yield that Bw was superior to Bm in mitigating the GNE while  
2 Bm performed better in vegetable yield (Table 3d and e). Furthermore, from our perspective, economic  
3 effectiveness/feasibility, such as the net ecosystem economic budget, should be considered synchronously in intensive  
4 vegetable production before large scale biochar applicat

## 1 **5. Conclusion**

2 The study demonstrated that biochar amendments ~~mostly generally~~ reduced N<sub>2</sub>O and NO emissions while slightly  
3 increased ~~about influencing~~ the NH<sub>3</sub> emissions, while produced no consensus influences on yield though those effects  
4 were largely both biochar- and soil-specific. Additionally, biochar amendments did decrease GN<sub>r</sub>I in intensive vegetable  
5 soils across mainland China. Furthermore, Bw was superior to Bm in mitigating the GN<sub>r</sub>E whereas the Bm performed  
6 better in crop yield throughout all soils. Consequently, both soil type and biochar characteristics need to be seriously  
7 considered before large-scale biochar application under certain regions of intensive vegetable production.

1 **Acknowledge**

2 We would like to express our heartfelt gratitude to the anonymous reviewers for the constructive comments that greatly  
3 improved the manuscript. This work was jointly supported by the National Natural Science Foundation of China  
4 (41471192), Special Fund for Agro-Scientific Research in the Public Interest (201503106) and the Ministry of Science  
5 and Technology (2013BAD11B01).

1 **References**

2 Ameloot, N., Sleutel, S., Das, K. C., Kanagaratnam, J., and Neve, S. D.: Biochar amendment to soils with contrasting  
3 organic matter level: effects on N mineralization and biological soil properties, *Global Change Biology Bioenergy*, 7,  
4 135–144, 2015.

5 Anderson, J. and Domsch, K.: A physiological method for the quantitative measurement of microbial biomass in soils,  
6 *Soil biology and biochemistry*, 10, 215–221, 1978.

7 Anenberg, S. C., Schwartz, J., Shindell, D., Amann, M., Faluvegi, G., Klimont, Z., Janssensmaenhout, G., Pozzoli, L.,  
8 Van, D. R., and Vignati, E.: Global Air Quality and Health Co-benefits of Mitigating Near-Term Climate Change  
9 through Methane and Black Carbon Emission Controls, *Environmental Health Perspectives*, 120, 831–839, 2012.

10 Avnery, S., Mauzerall, D. L., Liu, J., and Horowitz, L. W.: Global crop yield reductions due to surface ozone exposure: 1.  
11 Year 2000 crop production losses and economic damage, *Atmospheric Environment*, 45, 2284–2296, 2011.

12 Behera, S. N., Sharma, M., Aneja, V. P., and Balasubramanian, R.: Ammonia in the atmosphere: a review on emission  
13 sources, atmospheric chemistry and deposition on terrestrial bodies, *Environmental Science and Pollution Research*,  
14 20, 8092–8131, 2013.

15 Boyer, E. W., Goodale, C. L., Jaworski, N. A., and Howarth, R. W.: Anthropogenic nitrogen sources and relationships to  
16 riverine nitrogen export in the northeastern USA. In: *The Nitrogen Cycle at Regional to Global Scales*, Springer,  
17 2002.

18 Cayuela, M., Van Zwieten, L., Singh, B., Jeffery, S., Roig, A., and Sánchez-Monedero, M.: Biochar's role in mitigating  
19 soil nitrous oxide emissions: A review and meta-analysis, *Agriculture, Ecosystems & Environment*, 191, 5–16, 2014.

20 Chan, K. Y. and Xu, Z.: Biochar: nutrient properties and their enhancement, *Biochar for environmental management:*  
21 *science and technology*, 2009. 67–84, 2009.

22 ~~Cheng, C. H., Lehmann, J., Thies, J. E., Burton, S. D., and Engelhard, M. H.: Oxidation of black carbon by biotic and~~  
23 ~~abiotic processes, *Organic Geochemistry*, 37, 1477–1488, 2006.~~

24 Ciais, P.: Carbon and other biogeochemical cycles: Final draft underlying scientific technical assessment, IPCC  
25 Secretariat, Geneva, 2013. 2013.

26 Clough, T. J. and Condon, L. M.: Biochar and the nitrogen cycle: introduction, *Journal of Environmental Quality*,  
27 39, 1218-1223, 2010.

28 Clough, T. J., Bertram, J. E., Ray, J. L., Condon, L. M., O'Callaghan, M., Sherlock, R. R., and Wells, N. S.: Unweathered  
29 Wood Biochar Impact on Nitrous Oxide Emissions from a Bovine-Urine-Amended Pasture Soil, *Soil Science*  
30 *Society of America Journal*, 74, 852–860, 2010.

- 1 Deng, J., Zhou, Z., Zheng, X., and Li, C.: Modeling impacts of fertilization alternatives on nitrous oxide and nitric oxide  
2 emissions from conventional vegetable fields in southeastern China, *Atmospheric Environment*, 81, 642–650, 2013.
- 3 Diao, T., Xie, L., Guo, L., Yan, H., Lin, M., Zhang, H., Lin, J., and Lin, E.: Measurements of N<sub>2</sub>O emissions from  
4 different vegetable fields on the North China Plain, *Atmospheric Environment*, 72, 70–76, 2013.
- 5 FAO, IIASA, ISRIC, and ISSCAS: Harmonized World Soil Database Version 1.2, 2012. 2012.
- 6 Field, J. L., Keske, C. M. H., Birch, G. L., Defoort, M. W., and Cotrufo, M. F.: Distributed biochar and bioenergy  
7 coproduction: a regionally specific case study of environmental benefits and economic impacts, *Global Change  
8 Biology Bioenergy*, 5, 177–191, 2013.
- 9 Food and Agriculture Organization (FAO) (2015) FAOSTAT (Food and Agriculture Organization Statistical Data)  
10 Statistical Yearbook Vol. 4. Available at: <http://faostat.fao.org> (accessed 12 August 2015)
- 11 Harrison, R. and Webb, J.: A review of the effect of N fertilizer type on gaseous emissions, *Advances in Agronomy*, 73,  
12 65–108, 2001.
- 13 Hass, A., Gonzalez, J. M., Lima, I. M., Godwin, H. W., Halvorson, J. J., and Boyer, D. G.: Chicken manure biochar as  
14 liming and nutrient source for acid Appalachian soil, *Journal of Environmental Quality*, 41, 1096–1106, 2012.
- 15 Hu, H. W., Macdonald, C. A., Trivedi, P., Anderson, I. C., Zheng, Y., Holmes, B., Bodrossy, L., Wang, J. T., He, J. Z., and  
16 Singh, B. K.: Effects of climate warming and elevated CO<sub>2</sub> on autotrophic nitrification and nitrifiers in dryland  
17 ecosystems, *Soil Biology & Biochemistry*, 92, 1–15, 2016.
- 18 Hussain, M., Farooq, M., Nawaz, A., Al-Sadi, A. M., Solaiman, Z. M., Alghamdi, S. S., Ammara, U., Yong, S. O., and  
19 Siddique, K. H. M.: Biochar for crop production: potential benefits and risks, *Journal of Soils & Sediments*, 2016.  
20 1–32, 2016.
- 21 [IPCC: Climate Change 2013: The Physical Science Basis: working group I contribution to the Fifth Assessment Report  
22 of the Intergovernmental Panel on Climate Change. Cambridge University Press, Stockholm, 2013.](#)
- 23 ~~IPCC, 2013. The Physical Science Basis: Working Group I Contribution to the Fifth Assessment Report of the  
24 Intergovernmental Panel on Climate Change. New York: Cambridge University Press 1, 535–531.~~
- 25 Islam, A., Chen, D., White, R. E., and Weatherley, A. J.: Chemical decomposition and fixation of nitrite in acidic pasture  
26 soils and implications for measurement of nitrification, *Soil Biology & Biochemistry*, 40, 262–265, 2008.
- 27 Jia, J., Li, B., Chen, Z., Xie, Z., and Xiong, Z.: Effects of biochar application on vegetable production and emissions of  
28 N<sub>2</sub>O and CH<sub>4</sub>, *Soil Science and Plant Nutrition*, 58, 503–509, 2012.
- 29 Joseph, S. D., Campsarbertain, M., Lin, Y., Munroe, P., Chia, C. H., Hook, J., Van, Z. L., Kimber, S., Cowie, A., and  
30 Singh, B. P.: An investigation into the reactions of biochar in soil, *Australian Journal of Soil Research*, 48, 501–515,



- 1        2010.
- 2    Ju, X. T., Kou, C. L., Zhang, F. S., and Christie, P.: Nitrogen balance and groundwater nitrate contamination: comparison  
3        among three intensive cropping systems on the North China Plain, *Environmental Pollution*, 143, 117–125, 2006.
- 4    Kim, J. Y., Song, C. H., Ghim, Y. S., Won, J. G., Yoon, S. C., Carmichael, G. R., and Woo, J. H.: An investigation on NH<sub>3</sub>  
5        emissions and particulate NH<sub>4</sub><sup>+</sup>–NO<sub>3</sub><sup>-</sup> formation in East Asia, *Atmospheric Environment*, 40, 2139–2150, 2006.
- 6    Kurola, J., Salkinoja-Salonen, M., Aarnio, T., Hultman, J., and Romantschuk, M.: Activity, diversity and population size  
7        of ammonia-oxidising bacteria in oil-contaminated landfarming soil, *FEMS Microbiology Letters*, 250, 33–38,  
8        2005.
- 9    Langridge, J. M., Lack, D., Brock, C. A., Bahreini, R., Middlebrook, A. M., Neuman, J. A., Nowak, J. B., Perring, A. E.,  
10       Schwar, J. P., and Spackman, J. R.: Evolution of aerosol properties impacting visibility and direct climate forcing  
11       in an ammonia-rich urban environment, *Journal of Geophysical Research Atmospheres*, 117, 2240–2260, 2012.
- 12   Li, B., Bi, Z., and Xiong, Z.: Dynamic responses of nitrous oxide emission and nitrogen use efficiency to nitrogen and  
13       biochar amendment in an intensified vegetable field in southeastern China, *Global Change Biology Bioenergy*, 2016.  
14       2016.
- 15   Li, B., Fan, C. H., Xiong, Z. Q., Li, Q. L., and Zhang, M.: The combined effects of nitrification inhibitor and biochar  
16       incorporation on yield-scaled N<sub>2</sub>O emissions from an intensively managed vegetable field in southeastern China,  
17       *Biogeosciences*, 12, 15185–15214, 2015a.
- 18   Li, B., Fan, C. H., Zhang, H., Chen, Z. Z., Sun, L. Y., and Xiong, Z. Q.: Combined effects of nitrogen fertilization and  
19       biochar on the net global warming potential, greenhouse gas intensity and net ecosystem economic budget in  
20       intensive vegetable agriculture in southeastern China, *Atmospheric Environment*, 100, 10–19, 2015b.
- 21   Liu, X., Zhang, A., Ji, C., Joseph, S., Bian, R., Li, L., Pan, G., and Paz-Ferreiro, J.: Biochar’s effect on crop productivity  
22       and the dependence on experimental conditions—a meta-analysis of literature data, *Plant and Soil*, 373, 583–594,  
23       2013.
- 24   Lu, R.: *Methods of soil and agro-chemical analysis*, China Agricultural Science and Technology Press, Beijing, 2000.  
25       127–332, 2000. (in Chinese)\_
- 26   [Ma, L., Shan, J., Yan, X., 2015. Nitrite behavior accounts for the nitrous oxide peaks following fertilization in a  
27       fluvo-aquic soil. \*Biology and Fertility of Soils\* 51, 563-572.](#)
- 28   Major, J., Lehmann, J., Rondon, M., and Goodale, C.: Fate of soil-applied black carbon: downward migration, leaching  
29       and soil respiration, *Global Change Biology*, 16, 1366–1379, 2010.
- 30

- 1 ~~Mandal, S., Thangarajan, R., Bolan, N. S., Sarkar, B., Khan, N., Ok, Y. S., and Naidu, R.: Biochar induced concomitant~~  
2 ~~decrease in ammonia volatilization and increase in nitrogen use efficiency by wheat, Chemosphere, 142, 120–127,~~  
3 ~~2016.~~
- 4 Mei, B. L., Zheng, X. H., Xie, B. H., Dong, H. B., Zhou, Z. X., Rui, W., Jia, D., Feng, C., Tong, H. J., and Zhu, J. G.:  
5 Nitric oxide emissions from conventional vegetable fields in southeastern China, Atmospheric Environment, 43,  
6 2762–2769, 2009.
- 7 Misselbrook, T. H., Weerden, T. J. V. D., Pain, B. F., Jarvis, S. C., Chambers, B. J., Smith, K. A., Phillips, V. R., and  
8 Demmers, T. G. M.: Ammonia emission factors for UK agriculture, Atmospheric Environment, 34, 871–880(810),  
9 2000.
- 10 Mukherjee, A. and Zimmerman, A. R.: Organic carbon and nutrient release from a range of laboratory-produced biochars  
11 and biochar–soil mixtures, Geoderma, s 193–194, 122–130, 2013.
- 12 Nelissen, V.: Effect of different biochar and fertilizer types on N<sub>2</sub>O and NO emissions, Soil Biology & Biochemistry, 70,  
13 244–255, 2014.
- 14 Novak, J. M., Spokas, K. A., Cantrell, K. B., Ro, K. S., Watts, D. W., Glaz, B., Busscher, W. J., and Hunt, P. G.: Effects  
15 of biochars and hydrochars produced from lignocellulosic and animal manure on fertility of a Mollisol and Entisol,  
16 Soil Use and Management, 30, 175–181, 2014.
- 17 Obia, A., Cornelissen, G., Mulder, J., and Dürsch, P.: Effect of Soil pH Increase by Biochar on NO, N<sub>2</sub>O and N<sub>2</sub>  
18 Production during Denitrification in Acid Soils, Plos One, 10, 359–367, 2015.
- 19 Pacholski, A., Cai, G. X., Fan, X. H., Ding, H., Chen, D., Nieder, R., and Roelcke, M.: Comparison of different methods  
20 for the measurement of ammonia volatilization after urea application in Henan Province, China, Journal of Plant  
21 Nutrition and Soil Science, 171, 361–369, 2008.
- 22 Pinder, R. W., Adams, P. J., and Pandis, S. N.: Ammonia emission controls as a cost-effective strategy for reducing  
23 atmospheric particulate matter in the Eastern United States, Environmental Science & Technology, 41, 380–386,  
24 2007.
- 25 Powelson, D. S., Addiscott, T. M., Benjamin, N., Cassman, K. G., de Kok, T. M., Van, G. H., L'Hirondel, J. L., Avery, A.  
26 A., and Van, K. C.: When does nitrate become a risk for humans?, Journal of Environmental Quality, 37, 291–295,  
27 2008.
- 28 Rajkovich, S., Enders, A., Hanley, K., Hyland, C., Zimmerman, A. R., and Lehmann, J.: Corn growth and nitrogen  
29 nutrition after additions of biochars with varying properties to a temperate soil, Biology & Fertility of Soils, 48,  
30 271–284, 2012.

- 1 Ravishankara, A. R., Daniel, J. S., and Portmann, R. W.: Nitrous oxide (N<sub>2</sub>O): the dominant ozone-depleting substance  
2 emitted in the 21st century, *Science*, 326, 123–125, 2009.
- 3 ~~Ro, K. S., Lima, I. M., Reddy, G. B., Jackson, M. A., and Gao, B.: Removing Gaseous NH<sub>3</sub> Using Biochar as an  
4 Adsorbent, *Agriculture*, 5, 991–1002, 2015.~~
- 5 Saarnio, S., Heimonen, K., and Kettunen, R.: Biochar addition indirectly affects N<sub>2</sub>O emissions via soil moisture and  
6 plant N uptake, *Soil Biology & Biochemistry*, 58, 99–106, 2013.
- 7 Schouten, S., Groenigen, J. W. V., Oenema, O., and Cayuela, M. L.: Bioenergy from cattle manure? Implications of  
8 anaerobic digestion and subsequent pyrolysis for carbon and nitrogen dynamics in soil, *Global Change Biology*  
9 *Bioenergy*, 4, 751–760, 2012.
- 10 Schulz, H., Dunst, G., and Glaser, B.: Positive effects of composted biochar on plant growth and soil fertility, *Agronomy*  
11 *for Sustainable Development*, 33, 817–827, 2013.
- 12 Setia, R., Marschner, P., Baldock, J., Chittleborough, D., and Verma, V.: Relationships between carbon dioxide emission  
13 and soil properties in salt-affected landscapes, *Soil Biology & Biochemistry*, 43, 667–674, 2011.
- 14 Shannon, M. C. and Grieve, C. M.: Tolerance of vegetable crops to salinity, *Scientia Horticulturae*, 78, 5–38, 1998.
- 15 Smith, M. S. and Tiedje, J. M.: Phases of denitrification following oxygen depletion in soil, *Soil Biology & Biochemistry*,  
16 11, 261–267, 1979.
- 17 Smith, P.: Soil carbon sequestration and biochar as negative emission technologies, *Global Change Biology*, 51, 574–575,  
18 2016.
- 19 Sohi, S. P.: Agriculture. Carbon storage with benefits, *Science*, 338, 1034–1035, 2012.
- 20 Sororzano, L.: Determination of ammonia in natural waters by the phenylhypochlorite method, *Limnol. Oceanogr*, 14,  
21 799–801, 1969.
- 22 Spokas, K. A. and Reicosky, D. C.: Impacts of sixteen different biochars on soil greenhouse gas production, *Ann.*  
23 *Environ. Sci*, 3, 4, 2009.
- 24 Stavi, I. and Lal, R.: Agroforestry and biochar to offset climate change: a review, *Agronomy for Sustainable*  
25 *Development*, 33, 81–96, 2013.
- 26 Sun, L., Li, L., Chen, Z., Wang, J., and Xiong, Z.: Combined effects of nitrogen deposition and biochar application on  
27 emissions of N<sub>2</sub>O, CO<sub>2</sub> and NH<sub>3</sub> from agricultural and forest soils, *Soil science and plant nutrition*, 60, 254–265,  
28 2014.
- 29 Ussiri, D. and Lal, R.: *The Role of Nitrous Oxide on Climate Change*, Springer Netherlands, 2013.
- 30 ~~Wang, B., Lehmann, J., Hanley, K., Hestrin, R., and Enders, A.: Ammonium retention by oxidized biochars produced at~~

- 1 | [different pyrolysis temperatures and residence times, \*Res Advances\*, 6, 41907–41913, 2016.](#)
- 2 | Wang, J., Chen, Z., Ma, Y., Sun, L., Xiong, Z., Huang, Q., and Sheng, Q.: Methane and nitrous oxide emissions as  
3 | affected by organic–inorganic mixed fertilizer from a rice paddy in southeast China, *Journal of Soils and Sediments*,  
4 | 13, 1408–1417, 2013.
- 5 | Wang, J., Chen, Z., Xiong, Z., Chen, C., Xu, X., Zhou, Q., and Kuzyakov, Y.: Effects of biochar amendment on  
6 | greenhouse gas emissions, net ecosystem carbon budget and properties of an acidic soil under intensive vegetable  
7 | production, *Soil Use and Management*, 31, 375–383, 2015a.
- 8 | Wang, S., Nan, J., Shi, C., Fu, Q., Gao, S., Wang, D., Cui, H., Saizlopez, A., and Zhou, B.: Atmospheric ammonia and its  
9 | impacts on regional air quality over the megacity of Shanghai, China, *Scientific Reports*, 5, 2015b.
- 10 | [Wrage, N., Velthof, G., Van Beusichem, M., Oenema, O., 2001. Role of nitrifier denitrification in the production of  
11 | nitrous oxide. \*Soil Biology and Biochemistry\* 33, 1723-1732.](#)
- 12 | Xiong, Z., Xie, Y., Xing, G., Zhu, Z., and Butenhoff, C.: Measurements of nitrous oxide emissions from vegetable  
13 | production in China, *Atmospheric Environment*, 40, 2225–2234, 2006.
- 14 | [Yao, Y., Gao, B., Zhang, M., Inyang, M., and Zimmerman, A. R.: Effect of biochar amendment on sorption and leaching  
15 | of nitrate, ammonium, and phosphate in a sandy soil, \*Chemosphere\*, 89, 1467–1471, 2012.](#)
- 16 | Yao, Z., Zheng, X., Xie, B., Mei, B., Wang, R., Klaus, B. B., Zhu, J., and Yin, R.: Tillage and crop residue management  
17 | significantly affects N-trace gas emissions during the non-rice season of a subtropical rice-wheat rotation, *Soil  
18 | Biology & Biochemistry*, 41, 2131–2140, 2009.
- 19 | Zhang, A., Cui, L., Pan, G., Li, L., Hussain, Q., Zhang, X., Zheng, J., and Crowley, D.: Effect of biochar amendment on  
20 | yield and methane and nitrous oxide emissions from a rice paddy from Tai Lake plain, China, *Agriculture  
21 | Ecosystems & Environment*, 139, 469–475, 2010.
- 22 | Zhang, F., Chen, X., and Vitousek, P.: Chinese agriculture: An experiment for the world, *Nature*, 497, 33-35, 2013.
- 23 | Zhang, M., Fan, C. H., Li, Q. L., Li, B., Zhu, Y. Y., and Xiong, Z. Q.: A 2-yr field assessment of the effects of chemical  
24 | and biological nitrification inhibitors on nitrous oxide emissions and nitrogen use efficiency in an intensively  
25 | managed vegetable cropping system, *Agriculture Ecosystems & Environment*, 201, 43–50, 2015.
- 26 | Zhang, Y., Luan, S., Chen, L., and Shao, M.: Estimating the volatilization of ammonia from synthetic nitrogenous  
27 | fertilizers used in China, *Journal of Environmental Management*, 92, 480–493, 2011.
- 28 | Zhao, L. M., Wu, L. H., Dong, C. J., and Li, Y. S.: Rice yield, nitrogen utilization and ammonia volatilization as  
29 | influenced by modified rice cultivation at varying nitrogen rates, *Agricultural Sciences*, 01, 10–16, 2010.
- 30 | Zhao, X., Wang, J., Wang, S., and Xing, G.: Successive straw biochar application as a strategy to sequester carbon and

带格式的: 字体颜色: 自动设置

带格式的: 段落间距段前: 0 磅, 行距:  
1.5 倍行距

- 1 improve fertility: A pot experiment with two rice/wheat rotations in paddy soil, *Plant and Soil*, 378, 279–294, 2014.
- 2 Zheng, X., Mei, B., Wang, Y., Xie, B., Wang, Y., Dong, H., Xu, H., Chen, G., Cai, Z., and Yue, J.: Quantification of N<sub>2</sub>O
- 3 fluxes from soil–plant systems may be biased by the applied gas chromatograph methodology, *Plant and Soil*, 311,
- 4 211–234, 2008.
- 5 Zhou, J. B., Chen, Z. J., Liu, X. J., Zhai, B. N., and Powelson, D. S.: Nitrate accumulation in soil profiles under
- 6 seasonally open ‘sunlight greenhouses’ in northwest China and potential for leaching loss during summer
- 7 fallow, *Soil Use and Management*, 26, 332–339, 2010.
- 8 [Zhu, T., Zhang, J., Cai, Z., 2011. The contribution of nitrogen transformation processes to total N<sub>2</sub>O emissions from](#)
- 9 [soils used for intensive vegetable cultivation. \*Plant and Soil\* 343, 313-327.](#)

带格式的: 字体: 五号, 字体颜色: 自动设置, 检查拼写和语法

带格式的: 缩进: 左侧: 0 厘米, 悬挂缩进: 2 字符

1 **Table legends**

2 **Table 1**

3 Soil organic carbon (SOC), soil total nitrogen (TN), soil pH, electric conductivity (EC) and microbial biomass carbon  
 4 (MBC) as affected by different treatments across the four vegetable soils.

| Soil          | Treatment | SOC (g kg <sup>-1</sup> ) | TN (g kg <sup>-1</sup> ) | pH         | EC (ds m <sup>-1</sup> ) | MBC (mg kg <sup>-1</sup> ) |
|---------------|-----------|---------------------------|--------------------------|------------|--------------------------|----------------------------|
| HN            | N         | 8.0±0.8c                  | 1.37±0.12b               | 4.37±0.04c | 1.76±0.21b               | 1353±119a                  |
|               | N+Bw      | 15.6±0.5b                 | 1.47±0.07b               | 4.64±0.04b | 2.43±0.31a               | 1173±49b                   |
|               | N+Bm      | 18.8±0.6a                 | 1.64±0.04a               | 5.01±0.03a | 2.00±0.32ab              | 1234±50ab                  |
| SX            | N         | 9.7±0.7c                  | 1.55±0.04b               | 7.53±0.02b | 1.74±0.27b               | 490±9a                     |
|               | N+Bw      | 15.6±0.8b                 | 1.62±0.06b               | 7.61±0.05a | 2.25±0.22a               | 495±16a                    |
|               | N+Bm      | 17.5±1.1a                 | 1.79±0.03a               | 7.63±0.01a | 1.96±0.06ab              | 504±18a                    |
| SD            | N         | 7.9±0.1b                  | 1.13±0.04b               | 7.70±0.08a | 0.85±0.03b               | 535±13b                    |
|               | N+Bw      | 14.2±0.6a                 | 1.20±0.04b               | 7.66±0.03a | 0.92±0.04a               | 554±10ab                   |
|               | N+Bm      | 15.5±1.4a                 | 1.37±0.06a               | 7.71±0.03a | 0.87±0.02ab              | 573±12a                    |
| HLJ           | N         | 29.9±0.5b                 | 2.19±0.04b               | 6.91±0.05a | 0.83±0.03b               | 921±44b                    |
|               | N+Bw      | 36.0±1.5a                 | 2.20±0.03b               | 6.92±0.06a | 0.95±0.03a               | 988±56b                    |
|               | N+Bm      | 38.1±1.8a                 | 2.41±0.01a               | 6.94±0.04a | 0.92±0.06a               | 1242±196a                  |
| ANOVA results |           |                           |                          |            |                          |                            |
| Biochar       |           | ***                       | ***                      | ***        | ***                      | *                          |
| Soil          |           | ***                       | ***                      | ***        | ***                      | ***                        |
| Biochar×Soil  |           | *                         | n.s.                     | ***        | n.s.                     | **                         |

5 Data shown are means ± standard deviations of three replicates. See Fig. 1 for treatments codes. Different letters within  
 6 the same column indicate significant differences among treatments within the same soil at  $p < 0.05$  level.  
 7 \*\*\*Significant at  $p < 0.001$ ; \*\*significant at  $p < 0.01$ ; \*significant at  $p < 0.05$ ; n.s. not significant.

带格式表格

带格式表格

带格式表格

带格式表格

1 **Table 2**

2 Two-way ANOVA and mean effects of biochar (Bc) and soil (S) types on cumulative ~~gaseous nitrogen~~ (N<sub>2</sub>O, NO and NH<sub>3</sub>) emissions, gaseous reactive nitrogen emission  
 3 (GN<sub>r</sub>E), vegetable yield and gaseous reactive nitrogen intensity (GN<sub>r</sub>I) during the entire sampling period.

| Factors                | DF | N <sub>2</sub> O emission |       |     | NO emission |       |     | NH <sub>3</sub> emission |     |      | GN <sub>r</sub> E |       |     | Vegetable yield |       |      | GN <sub>r</sub> I |       |      |
|------------------------|----|---------------------------|-------|-----|-------------|-------|-----|--------------------------|-----|------|-------------------|-------|-----|-----------------|-------|------|-------------------|-------|------|
|                        |    | SS                        | F     | P   | SS          | F     | P   | SS                       | F   | P    | SS                | F     | P   | SS              | F     | P    | SS                | F     | P    |
| Bc                     | 2  | 271.9                     | 65.1  | *** | 46.4        | 174.7 | *** | 0.5                      | 0.8 | n.s. | 380.5             | 86.4  | *** | 76.2            | 3.2   | n.s. | 0.1               | 7.9   | **   |
| S                      | 3  | 1429.9                    | 228.1 | *** | 152.2       | 382.1 | *** | 4.1                      | 3.8 | *    | 2322.6            | 351.5 | *** | 4316.9          | 123.3 | ***  | 2.3               | 110.3 | ***  |
| Bc×S                   | 6  | 179.3                     | 14.3  | *** | 33.4        | 41.9  | *** | 1.4                      | 0.7 | n.s. | 234.5             | 17.7  | *** | 230.4           | 3.3   | *    | 0.1               | 1.6   | n.s. |
| Model                  | 11 | 4009.7                    | 174.5 | *** | 225.3       | 154.3 | *** | 29.1                     | 7.5 | ***  | 5290              | 218.3 | *** | 15962.0         | 124.4 | ***  | 5.8               | 77.0  | ***  |
| Error                  | 24 | 50.1                      |       |     | 3.2         |       |     | 8.5                      |     |      | 52.9              |       |     | 280.0           |       |      | 0.2               |       |      |
| biochar effect (n = 9) |    |                           |       |     |             |       |     |                          |     |      |                   |       |     |                 |       |      |                   |       |      |
| N mean                 |    | 12.01 ±1.44a              |       |     | 2.86 ±0.24a |       |     | 5.92 ±0.24b              |     |      | 43.81 ±1.25b      |       |     | 20.50 ±1.60a    |       |      | 0.57 ±0.05a       |       |      |
| N+Bw mean              |    | 7.01 ±0.58b               |       |     | 1.55 ±0.14b |       |     | 6.65 ±0.27a              |     |      | 43.53 ±1.67b      |       |     | 14.94 ±0.84b    |       |      | 0.45 ±0.04b       |       |      |
| N+Bm mean              |    | 10.37 ±0.56a              |       |     | 1.55 ±0.10b |       |     | 7.01 ±0.25a              |     |      | 49.53 ±1.11a      |       |     | 18.60 ±0.65a    |       |      | 0.49 ±0.03ab      |       |      |
| Soil effect (n = 9)    |    |                           |       |     |             |       |     |                          |     |      |                   |       |     |                 |       |      |                   |       |      |
| HN mean                |    | 27.20 ±1.85a              |       |     | 5.80 ±0.50a |       |     | 5.31 ±0.16c              |     |      | 33.06 ±1.65c      |       |     | 38.04 ±1.90a    |       |      | 1.15 ±0.11a       |       |      |
| SX mean                |    | 4.89 ±0.45b               |       |     | 1.08 ±0.13b |       |     | 12.69 ±0.46a             |     |      | 25.05 ±1.11d      |       |     | 12.69 ±0.46b    |       |      | 0.51 ±0.01b       |       |      |
| SD mean                |    | 2.25 ±0.26c               |       |     | 0.25 ±0.09c |       |     | 9.51 ±0.55b              |     |      | 44.88 ±0.49b      |       |     | 9.51 ±0.55c     |       |      | 0.21 ±0.01c       |       |      |
| HLJ mean               |    | 4.48 ±0.68b               |       |     | 0.81 ±0.04b |       |     | 11.79 ±0.71a             |     |      | 79.50 ±2.41a      |       |     | 11.79 ±0.71b    |       |      | 0.15 ±0.01c       |       |      |

带格式表格

4 SS: the sum of squares.

5 F value: the ratio of mean squares of two independents samples.

6 P value: the index of differences between the control group and the experimental group. \*, \*\* and \*\*\* indicate significance at  $p < 0.05$ ,  $p < 0.01$  and  $p < 0.001$ , respectively.

7 n.s.: not significant.

8 Data shown are means ± standard deviations of the nine replicates. See Fig. 1 for treatments codes. Different letters within the same column indicate significant differences  
 9 among treatments at  $p < 0.05$  level.

1 **Table 3**

2 Cumulative gaseous nitrogen (N<sub>2</sub>O, NO and NH<sub>3</sub>) emissions, gaseous reactive nitrogen emission (GN<sub>r</sub>E), vegetable yield  
 3 and gaseous reactive nitrogen intensity (GN<sub>r</sub>I) under the different treatments across the four soils.

| Treatments                                                         | HN          | SX          | SD          | HLJ          |
|--------------------------------------------------------------------|-------------|-------------|-------------|--------------|
| (a) Cumulative N <sub>2</sub> O emissions (kg N ha <sup>-1</sup> ) |             |             |             |              |
| N                                                                  | 30.59±3.15a | 7.83±0.60a  | 2.52±0.37a  | 7.10±1.91a   |
| N+Bw                                                               | 19.45±2.43b | 3.20±0.28b  | 1.97±0.21a  | 3.45±0.86b   |
| N+Bm                                                               | 31.56±1.35a | 3.63±0.62b  | 2.26±0.58a  | 4.01±0.68b   |
| (b) Cumulative NO emissions (kg N ha <sup>-1</sup> )               |             |             |             |              |
| N                                                                  | 8.99±1.01a  | 1.27±0.15a  | 0.20±0.08a  | 0.97±0.11a   |
| N+Bw                                                               | 4.54±0.60b  | 0.80±0.13b  | 0.33±0.19a  | 0.52±0.03b   |
| N+Bm                                                               | 3.87±0.30b  | 1.16±0.17a  | 0.21±0.10a  | 0.94±0.03a   |
| (c) Cumulative NH <sub>3</sub> emissions (kg N ha <sup>-1</sup> )  |             |             |             |              |
| N                                                                  | 4.72±0.27a  | 5.79±0.54b  | 6.34±0.51a  | 5.67±0.42a   |
| N+Bw                                                               | 5.09±0.38a  | 6.83±0.74ab | 7.35±0.75a  | 6.24±0.49a   |
| N+Bm                                                               | 5.32±0.42a  | 7.57±0.57a  | 7.37±1.11a  | 6.48±0.43a   |
| (d) GN <sub>r</sub> E (kg N ha <sup>-1</sup> )                     |             |             |             |              |
| N                                                                  | 44.30±3.13a | 14.89±1.33a | 9.06±0.80a  | 13.74±1.67a  |
| N+Bw                                                               | 29.08±2.21b | 10.82±1.14b | 9.64±0.88a  | 10.21±0.92b  |
| N+Bm                                                               | 40.76±1.66a | 12.36±0.74b | 9.84±0.49a  | 11.42±0.27b  |
| (e) Vegetable yield (t ha <sup>-1</sup> )                          |             |             |             |              |
| N                                                                  | 35.20±2.52a | 25.29±3.90a | 39.09±2.03b | 75.65±5.84b  |
| N+Bw                                                               | 29.05±2.35b | 23.57±1.74a | 44.53±3.74b | 76.95±4.04ab |
| N+Bm                                                               | 34.93±2.87a | 26.30±2.63a | 51.00±3.18a | 85.89±3.29a  |
| (f) GN <sub>r</sub> I (kg N t <sup>-1</sup> yield)                 |             |             |             |              |
| N                                                                  | 1.27±0.18a  | 0.59±0.08a  | 0.23±0.02a  | 0.18±0.04a   |
| N+Bw                                                               | 1.01±0.12a  | 0.46±0.05b  | 0.22±0.04a  | 0.13±0.02b   |
| N+Bm                                                               | 1.17±0.15a  | 0.47±0.04b  | 0.19±0.01a  | 0.13±0.01b   |

4 Data shown are means ± standard deviations of the three replicates. See Fig. 1 for treatments codes. Different letters  
 5 within the same column indicate significant differences among treatments within the same soil at  $p < 0.05$  level.



1 **Table 4**

2 The correlations between N<sub>2</sub>O or NO emission and PNR or DEA in each soil.

| Item             | HN    |       | SX    |       | SD    |      | HLJ     |       |
|------------------|-------|-------|-------|-------|-------|------|---------|-------|
|                  | PNR   | DEA   | PNR   | DEA   | PNR   | DEA  | PNR     | DEA   |
| N <sub>2</sub> O | 0.75* | 0.66  | 0.49  | 0.76* | -0.10 | 0.16 | -0.82** | 0.70* |
| NO               | 0.62  | -0.29 | 0.79* | 0.69* | -0.54 | 0.01 | -0.63   | 0.22  |

3 Asterisks indicated 0.05 level significances (\* $p < 0.05$ ) and 0.01 level significances (\*\* $p < 0.01$ ), n = 9.

带格式表格

1 **Figure legends**

2 **Fig. 1** Potential nitrification rate (PNR) and Denitrification enzyme activity (DEA) under different treatments in HN, SX,  
3 SD and HLJ soils. The three treatments with each soil were urea without biochar (N), urea with wheat straw biochar  
4 (N+Bw) and urea with swine manure biochar (N+Bm). Bars indicate standard deviation (mean + SD, n = 3). Different  
5 letters above the bars indicate significant differences among the different treatments within the same soil, at  $p < 0.05$ .

6 **Fig. 2** Temporal dynamics of soil  $\text{N}_2\text{O}$  ( $\mu\text{g N m}^{-2}\text{h}^{-1} \pm \text{SD}$ , n = 3) fluxes under different treatments in HN (a), SX (b), SD  
7 (c) and HLJ (d) vegetable soils with five consecutive vegetable crops. The solid arrows indicate fertilization. See Fig. 1  
8 for treatments codes.

9 **Fig. 3** Temporal dynamics of soil NO ( $\mu\text{g N m}^{-2}\text{h}^{-1} \pm \text{SD}$ , n = 3) fluxes under different treatments in HN (a), SX (b), SD  
10 (c) and HLJ (d) vegetable soils with five consecutive vegetable crops. The solid arrows indicate fertilization. See Fig. 1  
11 for treatments codes.

12 **Fig. 4** Cumulative ammonia ( $\text{NH}_3$ ) emissions from the HN (a), SX (b), SD (c) and HLJ (d) soils during the four nitrogen  
13 fertilization events F: every N fertilization event. The bars indicate the standard deviation of the mean ( $\text{kg N ha}^{-1} \pm \text{SD}$ , n  
14 = 3) of each treatment for the sum of the four N fertilization events. See Fig. 1 for treatments codes. Different letters  
15 above the bars indicate significant differences among the different treatments for each soil, at  $p < 0.05$ .

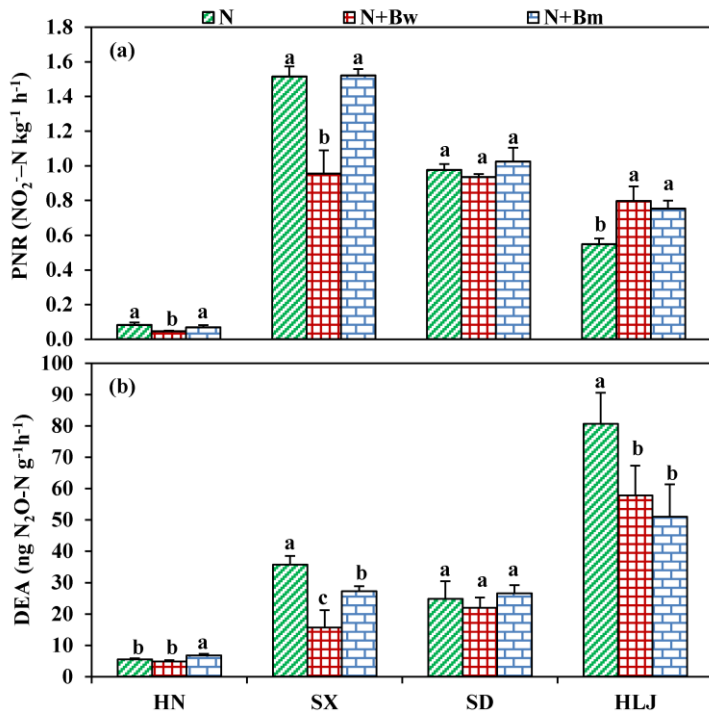

1

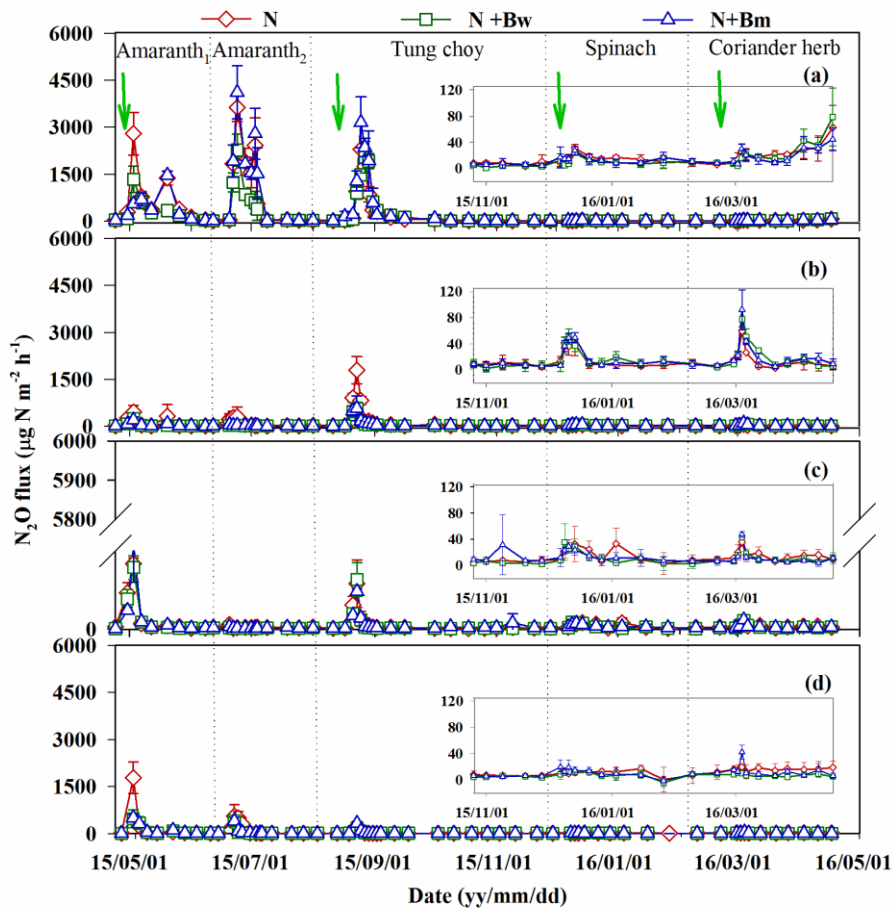

1

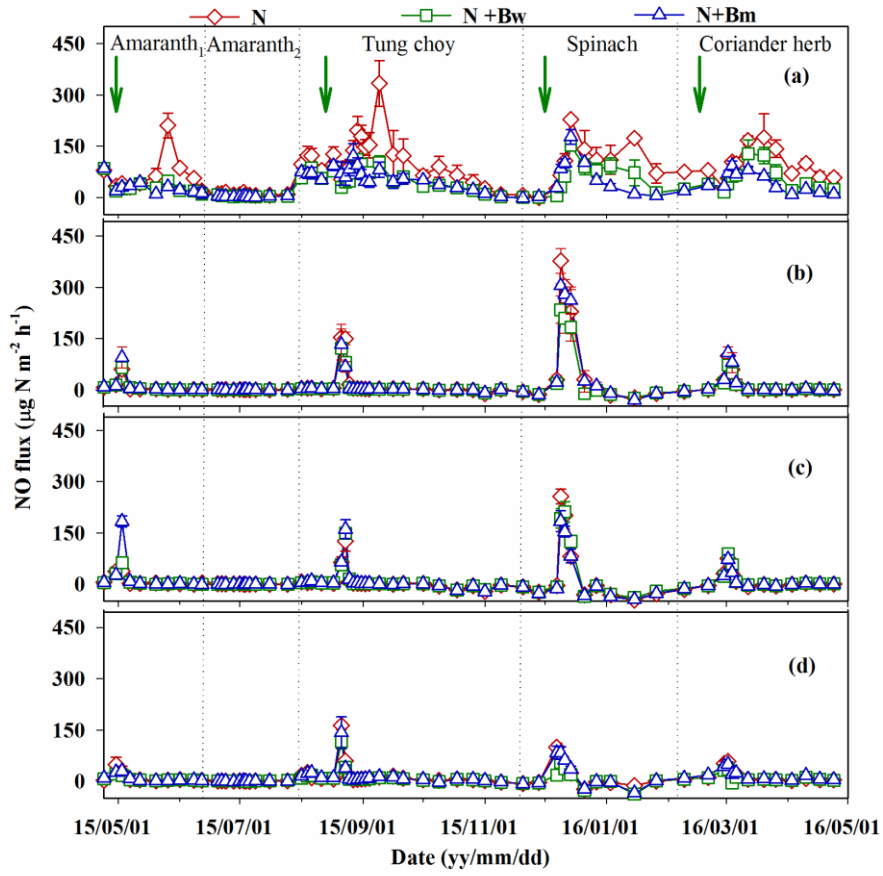

1

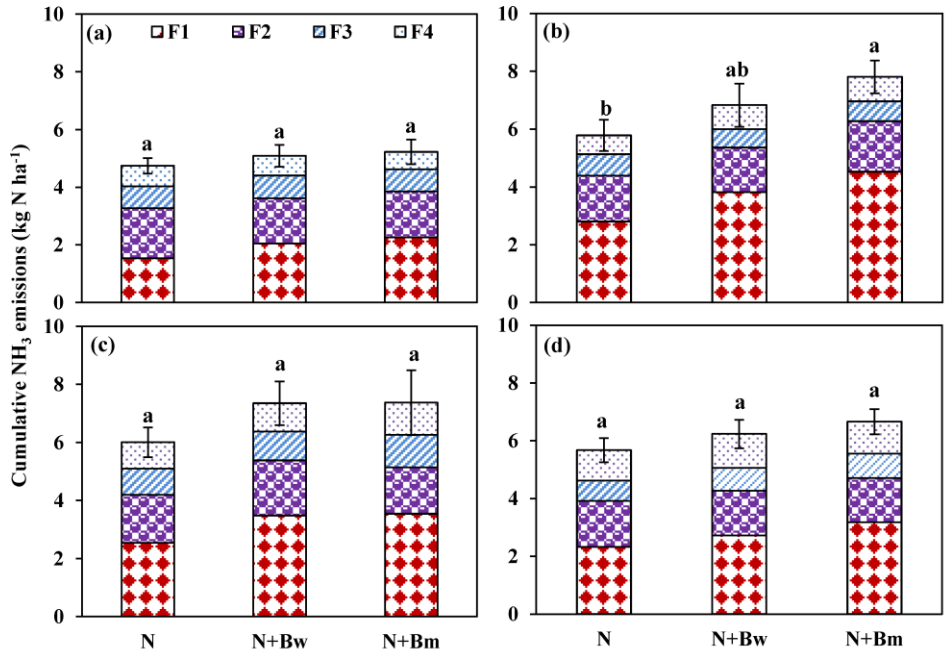

1
