# Supplementary material for: Effects of two contrasting biochars on gaseous nitrogen emissions andintensity in intensive vegetable soils across mainland China
Source: Copernicus journal article supplement (doi:10.5194/bg-2016-487), 2016-12-15
Supplement: Supplementary file [file bg-2016-487-AC4-supplement.pdf]

1           **Biochar can decrease the gaseous reactive nitrogen intensity in**  
2                   **intensive vegetable soils across mainland China**

3                                   Changhua Fan, Hao Chen, Bo Li, Zhengqin Xiong\*

4    Jiangsu Key Laboratory of Low Carbon Agriculture and GHGs Mitigation, College of Resources and Environmental  
5    Sciences, Nanjing Agricultural University, Nanjing 210095, China

6    \*Corresponding author (Z. Xiong): E-mail: zqxiong@njau.edu.cn;

7    Tel: +86-25-84395148; Fax: +86-25-84395210

1 **Highlights**

- 2 1. Two contrasting biochars affected GNrI across 4 major vegetable soils in China.
- 3 2. Biochar affects gaseous Nr or yield largely depending on soil types.
- 4 3. Both biochars decreased GNrI with Bw mitigated gaseous Nr whereas Bm improved yield.

1 **Abstract**

2 Biochar amendment to soil has been proposed as a strategy for sequestering carbon, mitigating climate change and  
3 enhancing crop productivity, but few studies have demonstrated the general effects of different feedstock-derived  
4 biochars on the various gaseous reactive nitrogen emissions (GNrEs, N<sub>2</sub>O, NO and NH<sub>3</sub>) simultaneously across the  
5 typical vegetable soils in China. A greenhouse pot experiment with five consecutive vegetable crops was conducted to  
6 investigate the effects of two contrasting biochar, namely, wheat straw biochar (Bw) and swine manure biochar (Bm) on  
7 GNrEs, vegetable yield and gaseous reactive nitrogen intensity (GNrI) in four typical vegetable soils from Acrisol  
8 (Hunan province), Anthrosol (Shanxi province), Cambisol (Shandong province) and Phaeozem (Heilongjiang province)  
9 which are representative of the intensive vegetable ecosystems across mainland China. Results showed that remarkable  
10 GNrE mitigation induced by biochar occurred in Anthrosol and Phaeozem, whereas enhancement of yield occurred  
11 in Cambisol and Phaeozem. Additionally, both biochars decreased GNrI with Bw performed better than Bm regarding  
12 N<sub>2</sub>O mitigation, with Bw mitigating N<sub>2</sub>O and NO emissions by 21.8–59.1 % and 37.0–49.5 % (except for Cambisol),  
13 respectively, while Bm improved yield by 13.5–30.5 % (except for Acrisol and Anthrosol). Biochar amendments  
14 generally stimulated the NH<sub>3</sub> emissions with greater enhancement from Bw than Bm. We can infer that the biochar's  
15 effects on the GNrEs and vegetable yield strongly depend on the attributes of the soil and biochar. Therefore, both soil  
16 type and biochar characteristics should be seriously considered before conducting large-scale application of biochar in  
17 order to achieve the maximum benefits under intensive greenhouse vegetable agriculture.

18 **Keyword:** Biochar, Intensive vegetable soil, Gaseous reactive nitrogen emissions (GNrEs), Gaseous reactive  
19 nitrogen intensity (GNrI)

# 1 **1 Introduction**

2 Agriculture accounts for an estimated emission of 4.1 (1.7–4.8) Tg N yr<sup>-1</sup> for N<sub>2</sub>O and 3.7 Tg N yr<sup>-1</sup> for NO,  
3 contributing 60 % and 10 %, respectively, to the total global anthropogenic emissions, largely due to increases of N  
4 fertilizer application in cropland (Ciais, 2013). The concentration of atmospheric N<sub>2</sub>O, a powerful, long-lived,  
5 greenhouse gas, has increased from 270 parts per billion by volume (ppbv) in the pre-industrial era to ~ 324 ppbv (Ussiri  
6 and Lal, 2013); it has 265 times the global warming potential (GWP) of CO<sub>2</sub> on a 100-year horizon (IPCC, 2013) and  
7 also causes depletion of the ozone layer in the atmosphere (Ravishankara et al., 2009). In contrast, NO<sub>x</sub>, which is mainly  
8 emitted as nitric oxide (NO), does not directly affect the earth's radiative balance but catalyzes the production of  
9 tropospheric ozone (O<sub>3</sub>), which is a greenhouse gas associated with detrimental effects on human health (Anenberg et al.,  
10 2012) and crop production (Avnery et al., 2011). Additionally, along with the high nitrogen (N) application, ammonia  
11 volatilization is one of the major N loss pathways (Harrison and Webb, 2001) as well, with up to 90% coming from  
12 agricultural activities (Misselbrook et al., 2000; Boyer et al., 2002). As a natural component and a dominant atmospheric  
13 alkaline gas, NH<sub>3</sub> plays an important role in atmospheric chemistry and ambient aerosol formation (Langridge et al.,  
14 2012; Wang et al., 2015b). In addition to nutrient enrichment (eutrophication) of terrestrial and aquatic systems and  
15 global acidification of precipitation, NH<sub>3</sub> has also been shown to be a major factor in the formation of atmospheric  
16 particulate matter and secondary aerosols (Kim et al., 2006; Pinder et al., 2007), leading to potentially adverse effects on  
17 human and ecosystem health such as visibility degradation and threats to biodiversity (Powelson et al., 2008; Behera et al.,  
18 2013). Consequently, the release of various reactive N species results in lower N use efficiency in agricultural systems.

19 In China, vegetable production devotes an area of approximately  $24.7 \times 10^6$  ha, equivalent to 12.4% of the total  
20 available cropping area, and the production represented 52 % of the world vegetable production in 2012 (FAO, 2015).  
21 Intensified vegetable cultivation in China is characterized by high N application rates, high cropping index and frequent  
22 farm practices. Annual nitrogen fertilizer inputs for intensively managed vegetable cultivation in rapidly developing areas  
23 are 3–6 times higher than in cereal grain cultivation in China (Ju et al., 2006; Diao et al., 2013; Wang et al., 2015a). As a  
24 result, great concern exists about excess N fertilizer application, leading to low use efficiency in intensive vegetable  
25 fields in China (Deng et al., 2013; Diao et al., 2013). Meanwhile, intensive vegetable agriculture is considered to be an  
26 important source of N<sub>2</sub>O (Xiong et al., 2006; Jia et al., 2012; Li et al., 2015b; Zhang et al., 2015) and NO production  
27 (Mei et al., 2009). Moreover, ammonia volatilization is another important N pathway in fertilized soil, resulting in large  
28 losses of soil-plant N (Pacholski et al., 2008; Zhang et al., 2011). Therefore, the reduction of reactive N loss becomes a  
29 central environmental challenge to meet the joint challenges of high production and acceptable environmental  
30 consequences in intensive vegetable production (Zhang et al., 2013).

1 Biochar is the dark-colored, carbon (C)-rich residue of pyrolysis or gasification of plant biomass under oxygen  
2 ( $O_2$ )-limited conditions, specifically produced for use as a soil amendment (Sohi, 2012). The amendment of agricultural  
3 ecosystems with biochar has been proposed as an effective countermeasure for climate change (Smith, 2016). These  
4 additions would increase soil carbon storage (Mukherjee and Zimmerman, 2013; Stavi and Lal, 2013), decrease GHG  
5 emissions (Li et al., 2016), and improve soil fertility and crop production (Major et al., 2010; Liu et al., 2013). However,  
6 some recent studies have reported no difference or even an increase in soil  $N_2O$  emissions induced by biochar application  
7 from different soils (Saarnio et al., 2013; Wang et al., 2015a). Still,  $NH_3$  volatilization was enhanced by biochar  
8 application in pasture soil (Clough et al., 2010), vegetable soil (Sun et al., 2014) and paddy soil in the wheat-growing  
9 season (Zhao et al., 2014). Additionally, crop productivity responses to biochar amendments differed among various  
10 biochars (Cayuela et al., 2014). These inconsistent results suggest that current biochar application to soil is not a  
11 “one-size fit-all paradigm” because of the variation in the physical and chemical characteristics of the different biochars,  
12 soil types and crop species (Field et al., 2013; Cayuela et al., 2014). Moreover, limited types of biochar (Spokas and  
13 Reicosky, 2009) and soil (Sun et al., 2014) were involved in the experiments in previous studies. Thus, the evaluation of  
14 the different types of biochar under the typical soils is imperative to gain a comprehensive understanding of potential  
15 interactions before the large-scale application of biochars in intensive vegetable cropping system in China.

16 Therefore, a greenhouse pot experiment was conducted in an effort to investigate the effects of different types of  
17 biochar on gaseous reactive nitrogen emissions (GNrEs), namely,  $N_2O$ ,  $NO$  and  $NH_3$ , simultaneously in four typical  
18 intensified vegetable soils across main vegetable production areas of mainland China. We hypothesized that: 1) biochar  
19 amendment could affect GNrEs, vegetable yield and GNrI in vegetable soils across mainland China, 2) those influences  
20 would vary among biochar and soil types. Overall, the objectives of this research were to gain a comprehensive insight  
21 into the effects of the different types of biochar on the GNrEs, vegetable yield and gaseous reactive nitrogen intensity  
22 (GNrI) in intensively managed vegetable production in China.

## 1 **2 Materials and methods**

### 2 *2.1. Experimental soil and biochar*

3 Four typical greenhouse vegetable cultivation sites with a long history (more than 10 years) of conventional  
4 cultivation were selected from Northeast, Northwest, Central and Eastern China (Fig. S1), namely, Phaeozem, Anthrosol,  
5 Acrisol and Cambisol (FAO and ISRIC, 2012). Those four types of vegetable soil were collected from: (1) Jiamusi  
6 (46°48' N, 130°12' E), Heilongjiang province; (2) Yangling (34°18' N, 108°2' E), Shanxi province; (3) Changsha  
7 (28°32' N, 113°23' E), Hunan province and (4) Shouguang (36°56' N, 118°38' E), Shandong province, respectively,  
8 which represented a range of differences in physicochemical properties and regions (Table S1). Soil samples were  
9 manually collected from the cultivated layer (0–20 cm) after the local vegetable harvest in April, 2015. The samples were  
10 air-dried and passed through a 5 mm stainless steel mesh sieve and homogenized thoroughly. Any visible roots and  
11 organic residues were removed manually before being packed with the necessary amount of soil to achieve the initial  
12 field bulk density. Each pot received 15 kg of 105 °C dry-weight-equivalent fresh soil. For each of the biochar  
13 amendment pot, 282.6 g pot<sup>-1</sup> sieved biochar (2 mm) was mixed with the soil thoroughly before the experiment, which  
14 was equivalent to a 40 t ha<sup>-1</sup> biochar dose (dry weight). No more biochar was added later in the experimental period.

15 Two types of biochar, derived from two common agricultural wastes in China were used: wheat straw and swine  
16 manure, hereafter referred to as Bw and Bm, respectively (Table S1). The Bw was produced at the Sanli New Energy  
17 Company in Henan, China, by pyrolysis and thermal decomposition at 400–500 °C. The Bm was produced through  
18 thermal decomposition at 400 °C by the State Key Laboratory of Soil Science and Sustainable Agricultural, Institute of  
19 Soil Science, Chinese Academy of Sciences. In accordance with Lu (2000), the SOC was measured by wet digestion with  
20 H<sub>2</sub>SO<sub>4</sub>–K<sub>2</sub>Cr<sub>2</sub>O<sub>7</sub>, TN was determined by semi-micro Kjeldahl digestion, and soil texture was determined with the pipette  
21 method. The soil pH and biochar pH were measured in deionized water at a volume ratio of 1:2.5 (soil to water) with a  
22 PHS-3C mv/pH detector (Shanghai Kangyi Inc. China). Biochar content of hydrogen (H) was measured by elemental  
23 analysis after dry combustion (Euro EA, Hekatech GmbH, Wegberg, Germany). The oxygen content of biochar was  
24 measured with the same device after pyrolysis of the sample at 1000 °C followed by reduction of the evolved O<sub>2</sub> to CO  
25 and quantification by GC-TCD. The soil NO<sub>3</sub><sup>-</sup>-N and NH<sub>4</sub><sup>+</sup>-N were measured following the two-wavelength ultraviolet  
26 spectrometry and indophenol blue methods, respectively, using an ultraviolet spectrophotometer (HITACHI, UV-2900,  
27 Tokyo, Japan). Electric conductivity (EC) was measured by using a Mettler-Toledo instrument (FE30-K, Shanghai, China)  
28 at a 1:5 (w:v) soil to water ratio. Cation exchange capacity (CEC) was determined using the CH<sub>3</sub>COONH<sub>4</sub> method.  
29 Dissolved organic carbon (DOC) was extracted from 5 g of the biochar/soil with an addition of 50 ml deionized water  
30 and measured by a TOC analyzer (TOC-2000/3000, Metash Instruments Co., LTD, Shanghai, China). Ash content was

1 measured by heating the biochars at 750 °C for 4 h. The specific surface area of the biochar material was tested using the  
2 Brunauer–Emmett–Teller (BET) method, from which the N adsorption–desorption isotherms at 77 K were measured by  
3 an automated gas adsorption analyzer ASAP2000 (Micromeritics, Norcross, GA) with + 5% accuracy. Scanning electron  
4 microscopy (SEM) imaging analysis was conducted using a HITACHI S-3000N scanning electron microscope.

## 5 2.2. *Experimental set-up and management*

6 The pot experiments were performed at the greenhouse experimental station of Nanjing Agricultural University,  
7 China. Five vegetable crops were grown successively in the four vegetable soils during the experimental period. For each  
8 type of soil, three treatments with three replicates were arranged in a random design: urea without biochar (N), urea with  
9 wheat straw biochar (N+Bw), urea with swine manure biochar (N+Bm). In addition, phosphate and potassium fertilizers  
10 in the form of calcium magnesium phosphate and potassium chloride, together with urea, were broadcasted and mixed  
11 with soil thoroughly prior to sowing the vegetables. No topdressing events occurred because of the frequent cultivation  
12 and short growth period for the leafy vegetables. Based on the vegetable growth, all pots received equal amounts of water  
13 and no precipitation. Detailed information on the pot management practices is provided in Table S2.

14 Each pot consists of a 30 cm × 30 cm (height × diameter) cylinder made of polyvinyl chloride (PVC). The top of  
15 each pot was surrounded by a special water-filled trough collar, which allowed a chamber to sit on the pot and prevent  
16 gas exchange during the gas-sampling period. Small holes (diameter of 1 cm) at the bottom of the pots were designed for  
17 drainage. To prevent soil loss, a fine nylon mesh (< 0.5 mm) was attached to the base of the soil cores before packing.

## 18 2.3. *Measurement of N<sub>2</sub>O, NO and NH<sub>3</sub>*

19 The NO and N<sub>2</sub>O fluxes were measured simultaneously from each vegetable cultivation using a static opaque  
20 chamber method (Zheng et al., 2008; Yao et al., 2009). A square PVC chamber of 35 cm × 35 cm × 40 cm (length ×  
21 width × height) was temporarily mounted on the pot for gas flux measurement. The chamber was coated with sponge and  
22 aluminum foil outside to prevent solar radiation heating the chamber. Gas samples for flux measurements were collected  
23 between 8 and 10 a.m. on each measuring day to minimize the influence of diurnal temperature variation. Gas fluxes  
24 were usually measured once a week and every other day for one week following fertilizer application. To measure the  
25 N<sub>2</sub>O flux, four samples were collected from the headspace chamber using 20 ml polypropylene syringes at 0, 10, 20, and  
26 30 min after chamber closure. The gas concentrations in the samples were analyzed within 12 h after sampling using an  
27 Agilent 7890A gas chromatograph equipped with an electron capture detector (ECD) for N<sub>2</sub>O detection. The carrier gas  
28 was argon-methane (50 %) at a flow rate of 40 ml min<sup>-1</sup>. The column and ECD temperatures were maintained at 40 and  
29 300 °C, respectively. The gas chromatography configurations described by Wang et al. (2013) were adopted for the gas  
30 concentration analysis. N<sub>2</sub>O flux was calculated using the linear increases in gas concentration with time. Sample sets

1 were rejected unless they yielded a linear regression value of  $R^2 > 0.90$ .

2 For each NO flux measurement, gas samples were collected from the same chamber that was used for the N<sub>2</sub>O flux  
3 measurements (Yao et al., 2009). Before closing the chamber, an approximately 1.0 L gas sample from the headspace of  
4 each chamber was extracted into an evacuated sampling bag (Delin Gas Packing Co., LTD, Dalian, China), and this  
5 measurement was regarded as time 0 min for NO analysis. After 30 min under chamber enclosure conditions (i.e., after  
6 the N<sub>2</sub>O sample collections were completed), another headspace gas sample with the same volume was extracted from  
7 each chamber into another evacuated bag. Within 1 h after sampling, NO concentrations were analyzed by a model 42i  
8 chemiluminescence NO–NO–NO<sub>x</sub> analyzer (Thermo Environmental Instruments Inc., Franklin, MA, USA). The NO  
9 fluxes were derived from the concentration differences between the two collected samples. The NO<sub>x</sub> analyzer was  
10 calibrated by a model 146i dynamic dilution calibrator system at the end of each crop-growing season.

11 The mean flux of N<sub>2</sub>O or NO during the experiment period was calculated as the average of all measured fluxes,  
12 which were weighted by the interval between the two measurements (Xiong et al., 2006). The cumulative N<sub>2</sub>O was  
13 calculated as the product of the mean flux and the entire duration.

14 The NH<sub>3</sub> volatilization was determined using the ventilation method (Zhao et al., 2010). The  
15 phosphoglycerol-soaked sponge was replaced every day after each fertilization event for approximately one week. The  
16 phosphoglycerol-soaked sponges used to collect the NH<sub>3</sub> samples were immediately extracted with 300 mL potassium  
17 chloride (KCl) solution (1 mol L<sup>-1</sup>) for 1 h. The concentration of ammonia nitrogen (NH<sub>4</sub><sup>+</sup>-N) was measured using the  
18 indophenol blue method at 625 nm (Sororzano, 1969) by ultraviolet spectrophotometry (HITACHI, UV-2900, Tokyo,  
19 Japan, with 0.005 absorbance of photometric accuracy). The cumulative seasonal NH<sub>3</sub> volatilization was the sum of the  
20 daily emissions during the measurement period.

#### 21 *2.4. Auxiliary measurements*

22 Simultaneously with the determination of trace gas fluxes, the air temperature and the soil temperature at a depth of  
23 5 cm were measured using thermally sensitive probes at each sampling date. Soil water content was also measured using  
24 a portable water detector (Mode TZS-1K, Zhejiang Top Instrument Corporation Ltd., China) by the frequency domain  
25 reflectometer method at a depth of 5 cm. Measured soil water contents (v/v) were converted to water filled pore space  
26 (WFPS) with the following equation:

$$27 \text{WFPS} = \text{volumetric water content (cm}^3 \text{ cm}^{-3}) / \text{total soil porosity (cm}^3 \text{ cm}^{-3}) \quad (1)$$

28 Here, total soil porosity =  $[1 - (\text{soil bulk density (g cm}^{-3}) / 2.65)]$  with an assumed soil particle density of 2.65 (g cm<sup>-3</sup>).

29 The total soil bulk density was determined with the cutting ring method according to Lu (2000).

30 After each vegetable crop reached physiological maturity, the fresh vegetable yield was measured by weighing the



1 whole aboveground and belowground biomass in each pot.

$$2 \text{ GNrE} = \text{cumulative N}_2\text{O} + \text{cumulative NO} + \text{cumulative NH}_3 \text{ emissions (kg N ha}^{-1}\text{)} \quad (2)$$

$$3 \text{ GNrI} = \text{GNrE} / \text{vegetable fresh yield (kg N t}^{-1} \text{ yield)} \quad (3)$$

4 After the one-year pot experiment, a soil sample from each pot was blended carefully. One subsample was stored at  
5 4 °C for determination of microbial biomass carbon (MBC), potential nitrification rate (PNR) and denitrification enzyme  
6 activity (DEA) within 3 days. Another subsample was air-dried for analysis of SOC, TN, pH and EC. MBC was  
7 determined by substrate-induced respiration using a gas chromatography (Anderson and Domsch 1978). PNR was  
8 measured using the chlorate inhibition soil-slurry method as previously described (Kurola et al., 2005) with  
9 modifications (Hu et al., 2016). DEA was quantified as described by Smith and Tiedje (1979).

#### 10 *2.5. Data processing and statistics*

11 One-way ANOVA was performed to test the effects of the treatments on cumulative N<sub>2</sub>O, NO and NH<sub>3</sub> emissions;  
12 GNrE; vegetable yield and GNrI. Two-way ANOVA was used to analyze the effects of the biochar type; soil type; and  
13 their interactions on N<sub>2</sub>O, NO and NH<sub>3</sub> emissions, vegetable yield, GNrE and GNrI throughout the experimental period.  
14 Multiple comparisons among the treatments were further explained using Tukey's HSD test. Significant differences were  
15 considered at  $P < 0.05$ . All statistical analyses were performed using JMP ver. 7.0 (SAS Institute, Cary, NC, USA, 2007).  
16 Pearson's correlation analysis was used to determine whether there were significant interrelationships between N<sub>2</sub>O/NO  
17 and PNR or DEA in each soil, using SPSS window version 18.0 (SPSS Inc., Chicago, USA).

### 1 **3. Results**

#### 2 *3.1. Soil responses to biochar amendment*

3 Obvious differences in all observed soil properties existed among soil types (Table 1,  $p < 0.001$ ), suggesting the  
4 wide variations of soil characters across mainland China. Additionally, biochar amendments had significant influences on  
5 all the soil properties (Table 1,  $p < 0.05$ ). Compared with N treatments, biochar amendments increased the SOC, TN and  
6 EC by 20.4–135.0 %, 0.5–21.2 % and 2.4–38.1 %, respectively, across all the soils. Compared with Bw, Bm amendment  
7 resulted in higher contents of SOC and TN by 5.8–20.5 % and 9.5–14.2 %, respectively, whereas EC values were higher  
8 by 3.3–21.5 % induced by Bw than Bm amendment over all soils. Additionally, biochar amendments significantly  
9 increased soil pH by 0.27–0.64 and 0.08–0.10 units compared with N treatment in Acrisol and Anthrosol soils ( $p < 0.05$ ),  
10 respectively, and Bm performed better than Bw on increasing soil pH in Acrisol. Furthermore, biochar amendments  
11 tended to increase MBC in Cambisol and Phaeozem, and Bm performed better in MBC enhancements than Bw in  
12 Phaeozem.

13 As shown in Fig. 1, no consensus effects on PNR and DEA were observed with biochar amendments across all soils.  
14 Compared with N treatment, biochar amendments significantly increased PNR in Phaeozem while exerted no influences  
15 on Cambisol (Fig. 1a). Compared with Bw, Bm amendment significantly increased PNR in Acrisol and Anthrosol.  
16 Moreover, compared with N, biochar amendments reduced DEA in most soils, significantly in Anthrosol and Phaeozem  
17 by an average of 40.1 and 37.8 % (Fig. 1b,  $p < 0.05$ ), respectively. In comparison with Bw, remarkable enhancements in  
18 DEA were observed by 42.5 and 74.4 % with Bm amendment in Acrisol and Anthrosol, respectively ( $p < 0.05$ ).

#### 19 *3.2. Seasonal variations of N<sub>2</sub>O and NO emissions*

20 The dynamics of N<sub>2</sub>O fluxes from all N-applied treatments in the four vegetable soils were relatively consistent and  
21 followed a sporadic and pulse-like pattern that was accompanied with fertilization, tillage and irrigation (Fig. 2). In  
22 addition, peak N<sub>2</sub>O fluxes varied greatly. Most of the N<sub>2</sub>O emissions occurred during the Amaranth and Tung choy  
23 growing periods, and there were several small emissions peaks during the Spinach and Coriander herb growing periods  
24 due to lower N application rate (Table S2), soil temperature and water content (Fig. S2). The highest peaks of N<sub>2</sub>O  
25 emissions from Acrisol, Anthrosol, Cambisol and Phaeozem were 4133.7, 1784.0, 432.4 and 1777.2  $\mu\text{g N m}^{-2} \text{h}^{-1}$ ,  
26 respectively. Although biochar (Bw and Bm) application did not significantly alter the seasonal pattern of the N<sub>2</sub>O fluxes,  
27 they greatly lowered some peaks of N<sub>2</sub>O emissions in the Anthrosol and Phaeozem by 8.7–74.4% and 23.6–73.6%,  
28 respectively (Fig. 2b and d).

29 Clearly, the NO fluxes demonstrated similar seasonal dynamics to the N<sub>2</sub>O fluxes (Fig. 3). Some relatively high  
30 peak NO fluxes were still observed in the Spinach and Coriander herb planting seasons even though relatively low

1 temperatures occurred during these periods, primarily due to lower soil moisture which was suitable for NO production.  
2 The NO fluxes ranged from -44.6 to 377.6  $\mu\text{g N m}^{-2} \text{h}^{-1}$  across all soil types. Furthermore, some NO peaks were  
3 significantly weakened with the Bw and Bm in the Acrisol (Fig. 3a).

### 4 3.3. Cumulative $\text{N}_2\text{O}$ , NO and $\text{NH}_3$ emissions

5 Cumulative  $\text{N}_2\text{O}$  emissions varied greatly among soil types (Table 2,  $p < 0.001$ ), from 1.97 to 31.56  $\text{kg N ha}^{-1}$  across  
6 all the soils during the vegetable cultivation period (Table 3a). Biochar amendments had significant influences on the  
7 cumulative  $\text{N}_2\text{O}$  emissions, reducing  $\text{N}_2\text{O}$  emissions by 13.7–41.6 % (Table 2). In comparison with the N treatment,  
8 biochar amendment resulted in no consistent effects on  $\text{N}_2\text{O}$  emissions over all soils (Table 3a), indicating significant  
9 interactions between biochar and soil types (Table 2,  $p < 0.001$ ). Additionally, Bw amendment performed better  
10 mitigation effects which decreased  $\text{N}_2\text{O}$  emissions by 11.8–38.4 % across all the soils, significantly in Acrisol in relation  
11 to Bm (Table 3a,  $p < 0.05$ ). The values of cumulative NO emissions were much smaller than those of  $\text{N}_2\text{O}$  emissions,  
12 with a remarkable variation of 0.20–8.99  $\text{kg N ha}^{-1}$  across all soils (Table 3b). Though pronounced effects on NO  
13 emissions with a reduction by average of 45.8 % (Table 2,  $p < 0.05$ ), biochar amendments had no consensus effects  
14 across soils (Table 3b), which suggested significant interactions between biochar and soil types (Table 2,  $p < 0.001$ ).  
15 Compared with Bm, Bw amendment significantly reduced NO emissions in Anthrosol and Phaeozem (Table 3b,  $p < 0.05$ ).  
16 Moreover,  $\text{N}_2\text{O}$  emissions had positive relationships with DEA both in Anthrosol and Phaeozem, and were affected  
17 positively with PNR in Acrisol (Table 4). Additionally, NO emissions had positive correlations with both PNR and DEA  
18 in Anthrosol. However, neither  $\text{N}_2\text{O}$  nor NO emissions were influenced significantly by PNR and DEA in Cambisol.

19 As is shown in Table 3c, the cumulative  $\text{NH}_3$  emissions fluctuated greatly from 4.72–7.57  $\text{kg N ha}^{-1}$  across all the  
20 soils. Biochar amendments produced no significant influences on the  $\text{NH}_3$  emissions relative to N treatment in most soils  
21 (Tables 2 and 3c). A tendency was found for the cumulative  $\text{NH}_3$  emissions in N+Bm to be higher than those in the  
22 N+Bw treatment, although this difference was not remarkable within each soil. Additionally, stimulation effects were  
23 consistently present after the first fertilization event in each type of soil (Fig. 4).

### 24 3.4. Vegetable yield and gaseous reactive N intensity during the five-vegetable crop rotation

25 The vegetable yields for the five consecutive vegetable crops are presented in Table 3e. Pronounced differences  
26 existed among all soils (Table 2,  $p < 0.001$ ). Biochar amendments exerted no significant effects on vegetable yield (Table  
27 2). Compared with the N treatment, biochar amendments were prone to increase vegetable yield in Cambisol and  
28 Phaeozem against Acrisol and Anthrosol (Tables 3e), denoting pronounced interactions between soil and biochar (Table 2,  
29  $p < 0.05$ ). Compared with Bm, Bw amendment lowered total yield over all the soils (Table 3e), significantly in Acrisol  
30 and Cambisol ( $p < 0.05$ ).

1            Table 3f presents the GNrI during the whole experiment period, with a pronounced variation among soils (Table 2,  $p$   
2 < 0.001). The GNrI was greatly affected by biochar amendment during the whole experiment period (Table 2,  $p$  < 0.01).  
3 Compared to N treatment, biochar amendments reduced the GNrI by 4.3–27.8 % across all soils, significantly in  
4 Anthrosol and Phaeozem (Table 3f,  $p$  < 0.05). Moreover, there were no remarkable differences between Bw and Bm  
5 throughout all soils.

## 1 **4. Discussion**

### 2 *4.1. Biochar effects on GNRs across different soil types*

3 The effects of biochar amendment on the N<sub>2</sub>O and NO emissions may be positive, negative or neutral, largely  
4 depending on the soil condition and the inherent characteristics of the biochar (Spokas and Reicosky, 2009; Nelissen et  
5 al., 2014). In our study, effects of two biochars on the N<sub>2</sub>O and NO emissions did not follow a consensus trend across the  
6 four typical vegetable soils (Table 3a, b). In agreement with Cayuela et al. (2014), who reported that the role of biochar in  
7 mitigating N<sub>2</sub>O emission was maximal in soils close to neutrality, remarkable mitigation effects were observed in  
8 Anthrosol and Phaeozem with the biochar amendments (Table 3a). These findings potentially resulted from the effects of  
9 the biochars on soil aeration, C/N ratio and pH, which affected the N dynamics and N cycling processes (Zhang et al.,  
10 2010; Ameloot et al., 2015). In line with Obia et al. (2015), biochar decreased NO emissions in low-pH Acrisol (Table  
11 3b), probably by inducing denitrification enzymes with higher activity, and then resulted in less NO accumulation  
12 relative to N<sub>2</sub> production. Moreover, the liming effects of biochar prevented the chemical decomposition of NO<sub>2</sub><sup>-</sup> to NO  
13 (Islam et al., 2008), leaving only enzymatically produced NO to accumulate. However, neither N<sub>2</sub>O nor NO emission was  
14 significantly influenced by PNR or DEA, suggesting other processes might play vital roles in Cambisol. Besides  
15 nitrification and denitrification, nitrifiers denitrification (Wrage et al., 2001) and heterotrophic nitrification (Zhu et al.,  
16 2011) can be important processes for producing N<sub>2</sub>O/NO as well, especially in vegetable soils with low pH, low  
17 carbon content and high N content (Wrage et al., 2001). Ma et al. (2015) speculated that nitrifier denitrification was  
18 the main process producing N<sub>2</sub>O in the North China Plain (Cambisol within this region). In addition, surplus N input  
19 in vegetable systems probably masked the beneficial effects of the biochar addition on the N transformation (Wang et al.,  
20 2015a). Therefore, the underlying mechanism of how biochar affect those processes needs to be illustrated in the further  
21 research.

22 On the other hand, different biochars may not produce universal influences on N<sub>2</sub>O emissions for the same soil due  
23 to the distinct properties of the biochar (Spokas and Reicosky, 2009). In the current study, overall, in comparison with  
24 Bm, the Bw amendment had more effective mitigation effects on N<sub>2</sub>O and NO emissions (Table 3a, b), largely due to the  
25 following reasons. First, compared with Bw, the contents of the TN and DOC in Bm were 1.8- and 1.4-fold (Table S1),  
26 respectively, which might supply extra N or C source for heterotrophic nitrification in the acidic Acrisol, which made Bm  
27 ineffective for reducing the N<sub>2</sub>O emissions (Table 3a). This result was in accordance with Li et al. (2015a), who observed  
28 that biochar amendment had no significant influence on the cumulative N<sub>2</sub>O emissions, and even higher N<sub>2</sub>O emissions  
29 occurred when biochar was input. Additionally, as shown in Fig.1, Bm was more prone to stimulate PNR and DEA, thus  
30 displaying lower mitigation ability than Bw. Second, compared with Bm, the C/N ratio was approximately twofold in Bw

1 (Table S1), presumably leading to more inorganic nitrogen being immobilized in biochar with a higher C/N ratio  
2 (Ameloot et al., 2015), decreasing the available N for microorganisms. Last, as presented in Fig. S3 and Table S1, Bw  
3 had more pores and surface area, having a better advantage over Bm in absorbing NO accordingly. Others have found  
4 that the lower mitigation capacity of high-N biochars (e.g., manures or biosolids) is probably due to the increased N  
5 release in the soil from the biochar (Schouten et al., 2012). To our knowledge, very few studies have investigated biochar  
6 effects on NO emissions (Nelissen et al., 2014; Obia et al., 2015), and the mechanisms through which biochar influence  
7 NO emissions are not elucidated yet. Therefore, more research is needed to clarify the underlying mechanisms of biochar  
8 on NO emission.

9 Intensive managed soils receiving fertilizer such as urea or anhydrous NH<sub>3</sub> and ruminant urine patches are potential  
10 hot spots for NH<sub>3</sub> formation, where the use of biochar is expected to retain NH<sub>3</sub>-N in the soil system (Clough and  
11 Condron, 2010). Actually, the effects of biochar amendments on NH<sub>3</sub> volatilization largely depend on soil characteristics,  
12 biochar types and duration time. Soil texture is an important factor impacting NH<sub>3</sub> transfer and release. More clay  
13 contents were present in the Anthrosol (Table S1), which was limited in large soil pores, thus, the addition of porous  
14 biochar could enhance the soil aeration, promoting NH<sub>3</sub> volatilization (Sun et al., 2014). Additionally, it was worthy to  
15 note that cumulative NH<sub>3</sub> emissions were slightly higher in soils with the Bm than those with the Bw amendment (Fig. 4  
16 and Table 3c) and that difference could presumably be attributed to less surface area and the much higher pH of Bm (Fig.  
17 S3 and Table S1), resulting in weak adsorption and great liming effects.

#### 18 *4.2. Biochar effects on vegetable yield and GNrI across different soil types*

19 The application of biochar is usually intended to increase crop yields, and evidence suggests this may be successful  
20 (Schulz et al., 2013; Li et al., 2016). Due to its liming effect, biochar helps to improve the supply of essential macro- and  
21 micronutrients for plant growth (Chan and Xu, 2009; Major et al., 2010). Enhancement of vegetable yield with biochar  
22 amendment occurred in Cambisol and Phaeozem (Table 3e). Additionally, the effects of Bm and Bw on vegetable yield  
23 were inconsistent, which probably due to the wide diversity of physicochemical characteristics of biochar that translates  
24 into variable reactions in soil (Novak et al., 2014). First, compared to Bw, Bm has a higher DOC content (Table S1),  
25 through which more nutrients may be directly introduced to the soil (Rajkovich et al., 2012). Secondly, besides their large  
26 amount of plant-available nutrients (Hass et al., 2012), biochars produced with manure have been generally considered  
27 significant for improving soil fertility by promoting soil structure development (Joseph et al., 2010), with the result that  
28 Bm was found superior to Bw in vegetable production enhancement in our case (Table 3e). As biochar effects on  
29 vegetable yield were variable, both biochar properties and soil conditions and crop species ought to be taken into account  
30 comprehensively before applying biochar to a certain soil condition.

1           However, no promotion of yield was observed with biochar amendments in Acrisol and Anthrosol. This could be  
2 attributed to exacerbated soil salinity, which inhibited the uptake of nutrients and water (Ju et al., 2006; Zhou et al., 2010)  
3 and the growth of the soil microorganisms (Setia et al., 2011), leading to unsustainable greenhouse vegetable production.  
4 Compared with other biochar (Jia et al., 2012), the higher amounts of ash in Bw and Bm may contain high salts causing  
5 soil salinity (Hussain et al., 2016). After the addition of the two salt-rich biochars, the EC values of Acrisol and Anthrosol  
6 vegetable soils increased and reached the limits to tolerance for the leafy vegetables (Shannon and Grieve, 1998). Here,  
7 we assessed two feedstock-derived biochar effects on GNrI in typical cultivated vegetable soils across mainland China.  
8 Overall, biochar amendments reduced GNrI over all the soils, with the magnitude largely depending on soil type.  
9 Remarkable reduction in GNrI had been detected due to the efficient mitigation induced by biochar in Anthrosol and  
10 Phaeozem (Table 3f). However, despite enhanced vegetable yield, no significant decreases in GNrI were observed in  
11 Cambisol, mainly because of the absence of mitigation effects on N<sub>2</sub>O, NO and NH<sub>3</sub> emissions of biochars (Table 3a, b  
12 and c) Overall, Bw was superior to Bm in mitigating the GNrE while Bm performed better in vegetable yield  
13 enhancement (Table 3d and e). Therefore, mitigation efficacys on GNrI were not notably different between Bw and Bm  
14 amendments across the four soils.

## 1 **5. Conclusion**

2       The study demonstrated that biochar amendments mostly reduced N<sub>2</sub>O and NO emissions and slightly increased the  
3 NH<sub>3</sub> emissions, while produced no consensus influences on yield though those effects were largely both biochar- and  
4 soil-specific. Additionally, biochar amendments did decrease GNrI in intensive vegetable soils across mainland China.  
5 Furthermore, Bw was superior to Bm in mitigating the GNrE whereas the Bm performed better in crop yield throughout  
6 all soils. Consequently, both soil type and biochar characteristics need to be seriously considered before large-scale  
7 biochar application under certain regions of intensive vegetable production.



1     **Acknowledge**

2     We would like to express our heartfelt gratitude to the anonymous reviewer for the constructive comments that greatly  
3     improved the manuscript. This work was jointly supported by the National Natural Science Foundation of China  
4     (41471192), Special Fund for Agro-Scientific Research in the Public Interest (201503106) and the Ministry of Science  
5     and Technology (2013BAD11B01).

## 1 **References**

- 2 Ameloot, N., Sleutel, S., Das, K. C., Kanagaratnam, J., and Neve, S. D.: Biochar amendment to soils with contrasting  
3 organic matter level: effects on N mineralization and biological soil properties, *Global Change Biology Bioenergy*, 7,  
4 135–144, 2015.
- 5 Anderson, J. and Domsch, K.: A physiological method for the quantitative measurement of microbial biomass in soils,  
6 *Soil biology and biochemistry*, 10, 215–221, 1978.
- 7 Anenberg, S. C., Schwartz, J., Shindell, D., Amann, M., Faluvegi, G., Klimont, Z., Janssensmaenhout, G., Pozzoli, L.,  
8 Van, D. R., and Vignati, E.: Global Air Quality and Health Co-benefits of Mitigating Near-Term Climate Change  
9 through Methane and Black Carbon Emission Controls, *Environmental Health Perspectives*, 120, 831–839, 2012.
- 10 Avnery, S., Mauzerall, D. L., Liu, J., and Horowitz, L. W.: Global crop yield reductions due to surface ozone exposure: 1.  
11 Year 2000 crop production losses and economic damage, *Atmospheric Environment*, 45, 2284–2296, 2011.
- 12 Behera, S. N., Sharma, M., Aneja, V. P., and Balasubramanian, R.: Ammonia in the atmosphere: a review on emission  
13 sources, atmospheric chemistry and deposition on terrestrial bodies, *Environmental Science and Pollution Research*,  
14 20, 8092–8131, 2013.
- 15 Boyer, E. W., Goodale, C. L., Jaworski, N. A., and Howarth, R. W.: Anthropogenic nitrogen sources and relationships to  
16 riverine nitrogen export in the northeastern USA. In: *The Nitrogen Cycle at Regional to Global Scales*, Springer,  
17 2002.
- 18 Cayuela, M., Van Zwieten, L., Singh, B., Jeffery, S., Roig, A., and S á nchez-Monedero, M.: Biochar's role in mitigating  
19 soil nitrous oxide emissions: A review and meta-analysis, *Agriculture, Ecosystems & Environment*, 191, 5–16, 2014.
- 20 Chan, K. Y. and Xu, Z.: Biochar: nutrient properties and their enhancement, *Biochar for environmental management:*  
21 *science and technology*, 2009. 67–84, 2009.
- 22 Ciais, P.: Carbon and other biogeochemical cycles: Final draft underlying scientific technical assessment, IPCC  
23 Secretariat, Geneva, 2013. 2013.
- 24 Clough, T. J. and Condrón, L. M.: Biochar and the nitrogen cycle: introduction, *Journal of Environmental Quality*,  
25 39, 1218-1223, 2010.
- 26 Clough, T. J., Bertram, J. E., Ray, J. L., Condrón, L. M., O'Callaghan, M., Sherlock, R. R., and Wells, N. S.: Unweathered  
27 Wood Biochar Impact on Nitrous Oxide Emissions from a Bovine-Urine-Amended Pasture Soil, *Soil Science*  
28 *Society of America Journal*, 74, 852–860, 2010.
- 29 Deng, J., Zhou, Z., Zheng, X., and Li, C.: Modeling impacts of fertilization alternatives on nitrous oxide and nitric oxide  
30 emissions from conventional vegetable fields in southeastern China, *Atmospheric Environment*, 81, 642–650, 2013.

1 Diao, T., Xie, L., Guo, L., Yan, H., Lin, M., Zhang, H., Lin, J., and Lin, E.: Measurements of N<sub>2</sub>O emissions from  
2 different vegetable fields on the North China Plain, *Atmospheric Environment*, 72, 70–76, 2013.

3 FAO, IIASA, ISRIC, and ISSCAS: Harmonized World Soil Database Version 1.2, 2012. 2012.

4 Field, J. L., Keske, C. M. H., Birch, G. L., Defoort, M. W., and Cotrufo, M. F.: Distributed biochar and bioenergy  
5 coproduction: a regionally specific case study of environmental benefits and economic impacts, *Global Change  
6 Biology Bioenergy*, 5, 177–191, 2013.

7 Food and Agriculture Organization (FAO) (2015) FAOSTAT (Food and Agriculture Organization Statistical Data)  
8 Statistical Yearbook Vol. 4. Available at: <http://faostat.fao.org> (accessed 12 August 2015)

9 Harrison, R. and Webb, J.: A review of the effect of N fertilizer type on gaseous emissions, *Advances in Agronomy*, 73,  
10 65–108, 2001.

11 Hass, A., Gonzalez, J. M., Lima, I. M., Godwin, H. W., Halvorson, J. J., and Boyer, D. G.: Chicken manure biochar as  
12 liming and nutrient source for acid Appalachian soil, *Journal of Environmental Quality*, 41, 1096–1106, 2012.

13 Hu, H. W., Macdonald, C. A., Trivedi, P., Anderson, I. C., Zheng, Y., Holmes, B., Bodrossy, L., Wang, J. T., He, J. Z., and  
14 Singh, B. K.: Effects of climate warming and elevated CO<sub>2</sub> on autotrophic nitrification and nitrifiers in dryland  
15 ecosystems, *Soil Biology & Biochemistry*, 92, 1–15, 2016.

16 Hussain, M., Farooq, M., Nawaz, A., Al-Sadi, A. M., Solaiman, Z. M., Alghamdi, S. S., Ammara, U., Yong, S. O., and  
17 Siddique, K. H. M.: Biochar for crop production: potential benefits and risks, *Journal of Soils & Sediments*, 2016.  
18 1–32, 2016.

19 IPCC: Climate Change 2013: The Physical Science Basis: working group I contribution to the Fifth Assessment Report  
20 of the Intergovernmental Panel on Climate Change, Cambridge University Press, Stockholm, 2013.

21 Islam, A., Chen, D., White, R. E., and Weatherley, A. J.: Chemical decomposition and fixation of nitrite in acidic pasture  
22 soils and implications for measurement of nitrification, *Soil Biology & Biochemistry*, 40, 262–265, 2008.

23 Jia, J., Li, B., Chen, Z., Xie, Z., and Xiong, Z.: Effects of biochar application on vegetable production and emissions of  
24 N<sub>2</sub>O and CH<sub>4</sub>, *Soil Science and Plant Nutrition*, 58, 503–509, 2012.

25 Joseph, S. D., Camparbestain, M., Lin, Y., Munroe, P., Chia, C. H., Hook, J., Van, Z. L., Kimber, S., Cowie, A., and  
26 Singh, B. P.: An investigation into the reactions of biochar in soil, *Australian Journal of Soil Research*, 48, 501–515,  
27 2010.

28 Ju, X. T., Kou, C. L., Zhang, F. S., and Christie, P.: Nitrogen balance and groundwater nitrate contamination: comparison  
29 among three intensive cropping systems on the North China Plain, *Environmental Pollution*, 143, 117–125, 2006.

30 Kim, J. Y., Song, C. H., Ghim, Y. S., Won, J. G., Yoon, S. C., Carmichael, G. R., and Woo, J. H.: An investigation on NH<sub>3</sub>

1 emissions and particulate  $\text{NH}_4^+ - \text{NO}_3^-$  formation in East Asia, *Atmospheric Environment*, 40, 2139–2150, 2006.

2 Kurolo, J., Salkinoja-Salonen, M., Aarnio, T., Hultman, J., and Romantschuk, M.: Activity, diversity and population size  
3 of ammonia-oxidising bacteria in oil-contaminated landfarming soil, *FEMS Microbiology Letters*, 250, 33–38,  
4 2005.

5 Langridge, J. M., Lack, D., Brock, C. A., Bahreini, R., Middlebrook, A. M., Neuman, J. A., Nowak, J. B., Perring, A. E.,  
6 Schwarz, J. P., and Spackman, J. R.: Evolution of aerosol properties impacting visibility and direct climate forcing  
7 in an ammonia-rich urban environment, *Journal of Geophysical Research Atmospheres*, 117, 2240–2260, 2012.

8 Li, B., Bi, Z., and Xiong, Z.: Dynamic responses of nitrous oxide emission and nitrogen use efficiency to nitrogen and  
9 biochar amendment in an intensified vegetable field in southeastern China, *Global Change Biology Bioenergy*, 2016.  
10 2016.

11 Li, B., Fan, C. H., Xiong, Z. Q., Li, Q. L., and Zhang, M.: The combined effects of nitrification inhibitor and biochar  
12 incorporation on yield-scaled  $\text{N}_2\text{O}$  emissions from an intensively managed vegetable field in southeastern China,  
13 *Biogeosciences*, 12, 15185–15214, 2015a.

14 Li, B., Fan, C. H., Zhang, H., Chen, Z. Z., Sun, L. Y., and Xiong, Z. Q.: Combined effects of nitrogen fertilization and  
15 biochar on the net global warming potential, greenhouse gas intensity and net ecosystem economic budget in  
16 intensive vegetable agriculture in southeastern China, *Atmospheric Environment*, 100, 10–19, 2015b.

17 Liu, X., Zhang, A., Ji, C., Joseph, S., Bian, R., Li, L., Pan, G., and Paz-Ferreiro, J.: Biochar's effect on crop productivity  
18 and the dependence on experimental conditions—a meta-analysis of literature data, *Plant and Soil*, 373, 583–594,  
19 2013.

20 Lu, R.: *Methods of soil and agro-chemical analysis*, China Agricultural Science and Technology Press, Beijing, 2000.  
21 127–332, 2000. (in Chinese)

22 Ma, L., Shan, J., Yan, X., 2015. Nitrite behavior accounts for the nitrous oxide peaks following fertilization in a  
23 fluvo-aquic soil. *Biology and Fertility of Soils* 51, 563-572.

24 Major, J., Lehmann, J., Rondon, M., and Goodale, C.: Fate of soil-applied black carbon: downward migration, leaching  
25 and soil respiration, *Global Change Biology*, 16, 1366–1379, 2010.

26 Mei, B. L., Zheng, X. H., Xie, B. H., Dong, H. B., Zhou, Z. X., Rui, W., Jia, D., Feng, C., Tong, H. J., and Zhu, J. G.:  
27 Nitric oxide emissions from conventional vegetable fields in southeastern China, *Atmospheric Environment*, 43,  
28 2762–2769, 2009.

29 Misselbrook, T. H., Weerden, T. J. V. D., Pain, B. F., Jarvis, S. C., Chambers, B. J., Smith, K. A., Phillips, V. R., and  
30 Demmers, T. G. M.: Ammonia emission factors for UK agriculture, *Atmospheric Environment*, 34, 871–880(810),

1 2000.

2 Mukherjee, A. and Zimmerman, A. R.: Organic carbon and nutrient release from a range of laboratory-produced biochars  
3 and biochar–soil mixtures, *Geoderma*, s 193–194, 122–130, 2013.

4 Nelissen, V.: Effect of different biochar and fertilizer types on N<sub>2</sub>O and NO emissions, *Soil Biology & Biochemistry*, 70,  
5 244–255, 2014.

6 Novak, J. M., Spokas, K. A., Cantrell, K. B., Ro, K. S., Watts, D. W., Glaz, B., Busscher, W. J., and Hunt, P. G.: Effects  
7 of biochars and hydrochars produced from lignocellulosic and animal manure on fertility of a Mollisol and Entisol,  
8 *Soil Use and Management*, 30, 175–181, 2014.

9 Obia, A., Cornelissen, G., Mulder, J., and Dörsch, P.: Effect of Soil pH Increase by Biochar on NO, N<sub>2</sub>O and N<sub>2</sub>  
10 Production during Denitrification in Acid Soils, *Plos One*, 10, 359–367, 2015.

11 Pacholski, A., Cai, G. X., Fan, X. H., Ding, H., Chen, D., Nieder, R., and Roelcke, M.: Comparison of different methods  
12 for the measurement of ammonia volatilization after urea application in Henan Province, China, *Journal of Plant  
13 Nutrition and Soil Science*, 171, 361–369, 2008.

14 Pinder, R. W., Adams, P. J., and Pandis, S. N.: Ammonia emission controls as a cost-effective strategy for reducing  
15 atmospheric particulate matter in the Eastern United States, *Environmental Science & Technology*, 41, 380–386,  
16 2007.

17 Powlson, D. S., Addiscott, T. M., Benjamin, N., Cassman, K. G., de Kok, T. M., Van, G. H., L'Hirondel, J. L., Avery, A.  
18 A., and Van, K. C.: When does nitrate become a risk for humans?, *Journal of Environmental Quality*, 37, 291–295,  
19 2008.

20 Rajkovich, S., Enders, A., Hanley, K., Hyland, C., Zimmerman, A. R., and Lehmann, J.: Corn growth and nitrogen  
21 nutrition after additions of biochars with varying properties to a temperate soil, *Biology & Fertility of Soils*, 48,  
22 271–284, 2012.

23 Ravishankara, A. R., Daniel, J. S., and Portmann, R. W.: Nitrous oxide (N<sub>2</sub>O): the dominant ozone-depleting substance  
24 emitted in the 21st century, *Science*, 326, 123–125, 2009.

25 Saarnio, S., Heimonen, K., and Kettunen, R.: Biochar addition indirectly affects N<sub>2</sub>O emissions via soil moisture and  
26 plant N uptake, *Soil Biology & Biochemistry*, 58, 99–106, 2013.

27 Schouten, S., Groenigen, J. W. V., Oenema, O., and Cayuela, M. L.: Bioenergy from cattle manure? Implications of  
28 anaerobic digestion and subsequent pyrolysis for carbon and nitrogen dynamics in soil, *Global Change Biology  
29 Bioenergy*, 4, 751–760, 2012.

30 Schulz, H., Dunst, G., and Glaser, B.: Positive effects of composted biochar on plant growth and soil fertility, *Agronomy*

1 for Sustainable Development, 33, 817–827, 2013.

2 Setia, R., Marschner, P., Baldock, J., Chittleborough, D., and Verma, V.: Relationships between carbon dioxide emission  
3 and soil properties in salt-affected landscapes, *Soil Biology & Biochemistry*, 43, 667–674, 2011.

4 Shannon, M. C. and Grieve, C. M.: Tolerance of vegetable crops to salinity, *Scientia Horticulturae*, 78, 5–38, 1998.

5 Smith, M. S. and Tiedje, J. M.: Phases of denitrification following oxygen depletion in soil, *Soil Biology & Biochemistry*,  
6 11, 261–267, 1979.

7 Smith, P.: Soil carbon sequestration and biochar as negative emission technologies, *Global Change Biology*, 51, 574–575,  
8 2016.

9 Sohi, S. P.: Agriculture. Carbon storage with benefits, *Science*, 338, 1034–1035, 2012.

10 Sororzano, L.: Determination of ammonia in natural waters by the phenolhypochlorite method, *Limnol. Oceanogr*, 14,  
11 799–801, 1969.

12 Spokas, K. A. and Reicosky, D. C.: Impacts of sixteen different biochars on soil greenhouse gas production, *Ann.*  
13 *Environ. Sci*, 3, 4, 2009.

14 Stavi, I. and Lal, R.: Agroforestry and biochar to offset climate change: a review, *Agronomy for Sustainable*  
15 *Development*, 33, 81–96, 2013.

16 Sun, L., Li, L., Chen, Z., Wang, J., and Xiong, Z.: Combined effects of nitrogen deposition and biochar application on  
17 emissions of N<sub>2</sub>O, CO<sub>2</sub> and NH<sub>3</sub> from agricultural and forest soils, *Soil science and plant nutrition*, 60, 254–265,  
18 2014.

19 Ussiri, D. and Lal, R.: *The Role of Nitrous Oxide on Climate Change*, Springer Netherlands, 2013.

20 Wang, J., Chen, Z., Ma, Y., Sun, L., Xiong, Z., Huang, Q., and Sheng, Q.: Methane and nitrous oxide emissions as  
21 affected by organic–inorganic mixed fertilizer from a rice paddy in southeast China, *Journal of Soils and Sediments*,  
22 13, 1408–1417, 2013.

23 Wang, J., Chen, Z., Xiong, Z., Chen, C., Xu, X., Zhou, Q., and Kuzyakov, Y.: Effects of biochar amendment on  
24 greenhouse gas emissions, net ecosystem carbon budget and properties of an acidic soil under intensive vegetable  
25 production, *Soil Use and Management*, 31, 375–383, 2015a.

26 Wang, S., Nan, J., Shi, C., Fu, Q., Gao, S., Wang, D., Cui, H., Saizlopez, A., and Zhou, B.: Atmospheric ammonia and its  
27 impacts on regional air quality over the megacity of Shanghai, China, *Scientific Reports*, 5, 2015b.

28 Wrage, N., Velthof, G., Van Beusichem, M., Oenema, O., 2001. Role of nitrifier denitrification in the production of  
29 nitrous oxide. *Soil Biology and Biochemistry* 33, 1723-1732.

30 Xiong, Z., Xie, Y., Xing, G., Zhu, Z., and Butenhoff, C.: Measurements of nitrous oxide emissions from vegetable

1 production in China, *Atmospheric Environment*, 40, 2225–2234, 2006.

2 Yao, Z., Zheng, X., Xie, B., Mei, B., Wang, R., Klaus, B. B., Zhu, J., and Yin, R.: Tillage and crop residue management  
3 significantly affects N-trace gas emissions during the non-rice season of a subtropical rice-wheat rotation, *Soil  
4 Biology & Biochemistry*, 41, 2131–2140, 2009.

5 Zhang, A., Cui, L., Pan, G., Li, L., Hussain, Q., Zhang, X., Zheng, J., and Crowley, D.: Effect of biochar amendment on  
6 yield and methane and nitrous oxide emissions from a rice paddy from Tai Lake plain, China, *Agriculture  
7 Ecosystems & Environment*, 139, 469–475, 2010.

8 Zhang, F., Chen, X., and Vitousek, P.: Chinese agriculture: An experiment for the world, *Nature*, 497, 33-35, 2013.

9 Zhang, M., Fan, C. H., Li, Q. L., Li, B., Zhu, Y. Y., and Xiong, Z. Q.: A 2-yr field assessment of the effects of chemical  
10 and biological nitrification inhibitors on nitrous oxide emissions and nitrogen use efficiency in an intensively  
11 managed vegetable cropping system, *Agriculture Ecosystems & Environment*, 201, 43–50, 2015.

12 Zhang, Y., Luan, S., Chen, L., and Shao, M.: Estimating the volatilization of ammonia from synthetic nitrogenous  
13 fertilizers used in China, *Journal of Environmental Management*, 92, 480–493, 2011.

14 Zhao, L. M., Wu, L. H., Dong, C. J., and Li, Y. S.: Rice yield, nitrogen utilization and ammonia volatilization as  
15 influenced by modified rice cultivation at varying nitrogen rates, *Agricultural Sciences*, 01, 10–16, 2010.

16 Zhao, X., Wang, J., Wang, S., and Xing, G.: Successive straw biochar application as a strategy to sequester carbon and  
17 improve fertility: A pot experiment with two rice/wheat rotations in paddy soil, *Plant and Soil*, 378, 279–294, 2014.

18 Zheng, X., Mei, B., Wang, Y., Xie, B., Wang, Y., Dong, H., Xu, H., Chen, G., Cai, Z., and Yue, J.: Quantification of N<sub>2</sub>O  
19 fluxes from soil–plant systems may be biased by the applied gas chromatograph methodology, *Plant and Soil*, 311,  
20 211–234, 2008.

21 Zhou, J. B., Chen, Z. J., Liu, X. J., Zhai, B. N., and Powlson, D. S.: Nitrate accumulation in soil profiles under  
22 seasonally open ‘sunlight greenhouses’ in northwest China and potential for leaching loss during summer  
23 fallow, *Soil Use and Management*, 26, 332–339, 2010.

24 Zhu, T., Zhang, J., Cai, Z., 2011. The contribution of nitrogen transformation processes to total N<sub>2</sub>O emissions from  
25 soils used for intensive vegetable cultivation. *Plant and Soil* 343, 313-327.

1 **Table legends**

2 **Table 1**

3 Soil organic carbon (SOC), soil total nitrogen (TN), soil pH, electric conductivity (EC) and microbial biomass carbon  
 4 (MBC) as affected by different treatments across the four vegetable soils.

| Soil          | Treatment | SOC (g kg <sup>-1</sup> ) | TN (g kg <sup>-1</sup> ) | pH         | EC (ds m <sup>-1</sup> ) | MBC (mg kg <sup>-1</sup> ) |
|---------------|-----------|---------------------------|--------------------------|------------|--------------------------|----------------------------|
| Acrisol       | N         | 8.0±0.8c                  | 1.37±0.12b               | 4.37±0.04c | 1.76±0.21b               | 1353±119a                  |
|               | N+Bw      | 15.6±0.5b                 | 1.47±0.07b               | 4.64±0.04b | 2.43±0.31a               | 1173±49b                   |
|               | N+Bm      | 18.8±0.6a                 | 1.64±0.04a               | 5.01±0.03a | 2.00±0.32ab              | 1234±50ab                  |
| Anthrosol     | N         | 9.7±0.7c                  | 1.55±0.04b               | 7.53±0.02b | 1.74±0.27b               | 490±9a                     |
|               | N+Bw      | 15.6±0.8b                 | 1.62±0.06b               | 7.61±0.05a | 2.25±0.22a               | 495±16a                    |
|               | N+Bm      | 17.5±1.1a                 | 1.79±0.03a               | 7.63±0.01a | 1.96±0.06ab              | 504±18a                    |
| Cambisol      | N         | 7.9±0.1b                  | 1.13±0.04b               | 7.70±0.08a | 0.85±0.03b               | 535±13b                    |
|               | N+Bw      | 14.2±0.6a                 | 1.20±0.04b               | 7.66±0.03a | 0.92±0.04a               | 554±10ab                   |
|               | N+Bm      | 15.5±1.4a                 | 1.37±0.06a               | 7.71±0.03a | 0.87±0.02ab              | 573±12a                    |
| Phaeozem      | N         | 29.9±0.5b                 | 2.19±0.04b               | 6.91±0.05a | 0.83±0.03b               | 921±44b                    |
|               | N+Bw      | 36.0±1.5a                 | 2.20±0.03b               | 6.92±0.06a | 0.95±0.03a               | 988±56b                    |
|               | N+Bm      | 38.1±1.8a                 | 2.41±0.01a               | 6.94±0.04a | 0.92±0.06a               | 1242±196a                  |
| ANOVA results |           |                           |                          |            |                          |                            |
| Biochar       |           | ***                       | ***                      | ***        | ***                      | *                          |
| Soil          |           | ***                       | ***                      | ***        | ***                      | ***                        |
| Biochar×Soil  |           | *                         | n.s.                     | ***        | n.s.                     | **                         |

5 Data shown are means ± standard deviations of three replicates. See Fig. 1 for treatments codes. Different letters within  
 6 the same column indicate significant differences among treatments within the same soil at  $p < 0.05$  level.

7 \*\*\*Significant at  $p < 0.001$ ; \*\*significant at  $p < 0.01$ ; \*significant at  $p < 0.05$ ; n.s. not significant.



1 **Table 2**

2 Two-way ANOVA and mean effects of biochar (Bc) and soil (S) types on cumulative N<sub>2</sub>O, NO and NH<sub>3</sub> emissions, gaseous reactive nitrogen emission (GNrE), vegetable  
 3 yield and gaseous reactive nitrogen intensity (GNrI) during the entire sampling period.

| Factors                 | DF | N <sub>2</sub> O emission |       |     | NO emission |       |     | NH <sub>3</sub> emission |     |      | GNrE        |       |     | Vegetable yield |       |      | GNrI        |       |      |
|-------------------------|----|---------------------------|-------|-----|-------------|-------|-----|--------------------------|-----|------|-------------|-------|-----|-----------------|-------|------|-------------|-------|------|
|                         |    | SS                        | F     | P   | SS          | F     | P   | SS                       | F   | P    | SS          | F     | P   | SS              | F     | P    | SS          | F     | P    |
| Bc                      | 2  | 271.9                     | 65.1  | *** | 46.4        | 174.7 | *** | 0.5                      | 0.8 | n.s. | 380.5       | 86.4  | *** | 76.2            | 3.2   | n.s. | 0.1         | 7.9   | **   |
| S                       | 3  | 1429.9                    | 228.1 | *** | 152.2       | 382.1 | *** | 4.1                      | 3.8 | *    | 2322.6      | 351.5 | *** | 4316.9          | 123.3 | ***  | 2.3         | 110.3 | ***  |
| Bc×S                    | 6  | 179.3                     | 14.3  | *** | 33.4        | 41.9  | *** | 1.4                      | 0.7 | n.s. | 234.5       | 17.7  | *** | 230.4           | 3.3   | *    | 0.1         | 1.6   | n.s. |
| Model                   | 11 | 4009.7                    | 174.5 | *** | 225.3       | 154.3 | *** | 29.1                     | 7.5 | ***  | 5290        | 218.3 | *** | 15962.0         | 124.4 | ***  | 5.8         | 77.0  | ***  |
| Error                   | 24 | 50.1                      |       |     | 3.2         |       |     | 8.5                      |     |      | 52.9        |       |     | 280.0           |       |      | 0.2         |       |      |
| biochar effect (n = 12) |    |                           |       |     |             |       |     |                          |     |      |             |       |     |                 |       |      |             |       |      |
| N mean                  |    | 12.01±1.44a               |       |     | 2.86±0.24a  |       |     | 5.63±0.72a               |     |      | 20.50±1.60a |       |     | 43.81±5.82a     |       |      | 0.57±0.05a  |       |      |
| N+Bw mean               |    | 7.01±0.58b                |       |     | 1.55±0.14b  |       |     | 6.37±1.02a               |     |      | 14.94±0.84b |       |     | 43.53±6.31a     |       |      | 0.45±0.04b  |       |      |
| N+Bm mean               |    | 10.37±0.56a               |       |     | 1.55±0.10b  |       |     | 6.68±1.10a               |     |      | 18.60±0.65a |       |     | 49.53±6.91a     |       |      | 0.49±0.03ab |       |      |
| Soil effect (n = 9)     |    |                           |       |     |             |       |     |                          |     |      |             |       |     |                 |       |      |             |       |      |
| Acrisol mean            |    | 27.20±1.85a               |       |     | 5.80±0.50a  |       |     | 5.31±0.16c               |     |      | 38.04±1.90a |       |     | 33.06±1.65c     |       |      | 1.15±0.11a  |       |      |
| Anthrosol mean          |    | 4.89±0.45b                |       |     | 1.08±0.13b  |       |     | 12.69±0.46a              |     |      | 12.69±0.46b |       |     | 25.05±1.11d     |       |      | 0.51±0.01b  |       |      |
| Cambisol mean           |    | 2.25±0.26c                |       |     | 0.25±0.09c  |       |     | 9.51±0.55b               |     |      | 9.51±0.55c  |       |     | 44.88±0.49b     |       |      | 0.21±0.01c  |       |      |
| Phaeozem mean           |    | 4.48±0.68b                |       |     | 0.81±0.04b  |       |     | 11.79±0.71a              |     |      | 11.79±0.71b |       |     | 79.50±2.41a     |       |      | 0.15±0.01c  |       |      |

4 SS: the sum of squares.

5 F value: the ratio of mean squares of two independents samples.

6 P value: the index of differences between the control group and the experimental group. \*, \*\* and \*\*\* indicate significance at  $p < 0.05$ ,  $p < 0.01$  and  $p < 0.001$ , respectively.

7 n.s.: not significant.

8 Data shown are means ± standard deviations of the nine replicates. See Fig. 1 for treatments codes. Different letters within the same column indicate significant differences

9 among treatments at  $p < 0.05$  level.

1 **Table 3**

2 Cumulative gaseous nitrogen (N<sub>2</sub>O, NO and NH<sub>3</sub>) emissions, gaseous reactive nitrogen emission (GNrE), vegetable yield  
 3 and gaseous reactive nitrogen intensity (GNrI) under the different treatments across the four soils.

| Treatments                                                         | Acrisol     | Anthrosol   | Cambisol    | Phaeozem     |
|--------------------------------------------------------------------|-------------|-------------|-------------|--------------|
| (a) Cumulative N <sub>2</sub> O emissions (kg N ha <sup>-1</sup> ) |             |             |             |              |
| N                                                                  | 30.59±3.15a | 7.83±0.60a  | 2.52±0.37a  | 7.10±1.91a   |
| N+Bw                                                               | 19.45±2.43b | 3.20±0.28b  | 1.97±0.21a  | 3.45±0.86b   |
| N+Bm                                                               | 31.56±1.35a | 3.63±0.62b  | 2.26±0.58a  | 4.01±0.68b   |
| (b) Cumulative NO emissions (kg N ha <sup>-1</sup> )               |             |             |             |              |
| N                                                                  | 8.99±1.01a  | 1.27±0.15a  | 0.20±0.08a  | 0.97±0.11a   |
| N+Bw                                                               | 4.54±0.60b  | 0.80±0.13b  | 0.33±0.19a  | 0.52±0.03b   |
| N+Bm                                                               | 3.87±0.30b  | 1.16±0.17a  | 0.21±0.10a  | 0.94±0.03a   |
| (c) Cumulative NH <sub>3</sub> emissions (kg N ha <sup>-1</sup> )  |             |             |             |              |
| N                                                                  | 4.72±0.27a  | 5.79±0.54b  | 6.34±0.51a  | 5.67±0.42a   |
| N+Bw                                                               | 5.09±0.38a  | 6.83±0.74ab | 7.35±0.75a  | 6.24±0.49a   |
| N+Bm                                                               | 5.32±0.42a  | 7.57±0.57a  | 7.37±1.11a  | 6.48±0.43a   |
| (d) GNrE (kg N ha <sup>-1</sup> )                                  |             |             |             |              |
| N                                                                  | 44.30±3.13a | 14.89±1.33a | 9.06±0.80a  | 13.74±1.67a  |
| N+Bw                                                               | 29.08±2.21b | 10.82±1.14b | 9.64±0.88a  | 10.21±0.92b  |
| N+Bm                                                               | 40.76±1.66a | 12.36±0.74b | 9.84±0.49a  | 11.42±0.27b  |
| (e) Vegetable yield (t ha <sup>-1</sup> )                          |             |             |             |              |
| N                                                                  | 35.20±2.52a | 25.29±3.90a | 39.09±2.03b | 75.65±5.84b  |
| N+Bw                                                               | 29.05±2.35b | 23.57±1.74a | 44.53±3.74b | 76.95±4.04ab |
| N+Bm                                                               | 34.93±2.87a | 26.30±2.63a | 51.00±3.18a | 85.89±3.29a  |
| (f) GNrI (kg N t <sup>-1</sup> yield)                              |             |             |             |              |
| N                                                                  | 1.27±0.18a  | 0.59±0.08a  | 0.23±0.02a  | 0.18±0.04a   |
| N+Bw                                                               | 1.01±0.12a  | 0.46±0.05b  | 0.22±0.04a  | 0.13±0.02b   |
| N+Bm                                                               | 1.17±0.15a  | 0.47±0.04b  | 0.19±0.01a  | 0.13±0.01b   |

4 Data shown are means ± standard deviations of the three replicates. See Fig. 1 for treatments codes. Different letters  
 5 within the same column indicate significant differences among treatments within the same soil at  $p < 0.05$  level.

1 **Table 4**

2 The correlations between N<sub>2</sub>O or NO emission and PNR or DEA in each soil.

| Item             | Acrisol |       | Anthrosol |       | Cambisol |      | Phaeozem |       |
|------------------|---------|-------|-----------|-------|----------|------|----------|-------|
|                  | PNR     | DEA   | PNR       | DEA   | PNR      | DEA  | PNR      | DEA   |
| N <sub>2</sub> O | 0.75*   | 0.66  | 0.49      | 0.76* | -0.10    | 0.16 | -0.82**  | 0.70* |
| NO               | 0.62    | -0.29 | 0.79*     | 0.69* | -0.54    | 0.01 | -0.63    | 0.22  |

3 Asterisks indicated 0.05 level significances (\* $p < 0.05$ ) and 0.01 level significances (\*\* $p < 0.01$ ), n = 9.

1 **Figure legends**

2 **Fig. 1** Potential nitrification rate (PNR) and Denitrification enzyme activity (DEA) under different treatments in Acrisol,  
3 Anthrosol, Cambisol and Phaeozem. The three treatments with each soil were urea without biochar (N), urea with wheat  
4 straw biochar (N+Bw) and urea with swine manure biochar (N+Bm). Bars indicate standard deviation (mean + SD, n =  
5 3). Different letters above the bars indicate significant differences among the different treatments within the same soil, at  
6  $p < 0.05$ .

7 **Fig. 2** Temporal dynamics of soil  $\text{N}_2\text{O}$  ( $\mu\text{g N m}^{-2} \text{h}^{-1} \pm \text{SD}$ , n = 3) fluxes under different treatments in Acrisol (a),  
8 Anthrosol (b), Cambisol (c) and Phaeozem (d) vegetable soils with five consecutive vegetable crops. The solid arrows  
9 indicate fertilization. See Fig. 1 for treatments codes.

10 **Fig. 3** Temporal dynamics of soil NO ( $\mu\text{g N m}^{-2} \text{h}^{-1} \pm \text{SD}$ , n = 3) fluxes under different treatments in Acrisol (a),  
11 Anthrosol (b), Cambisol (c) and Phaeozem (d) vegetable soils with five consecutive vegetable crops. The solid arrows  
12 indicate fertilization. See Fig. 1 for treatments codes.

13 **Fig. 4** Cumulative ammonia ( $\text{NH}_3$ ) emissions from the Acrisol (a), Anthrosol (b), Cambisol (c) and Phaeozem (d) soils  
14 during the four nitrogen fertilization events F: every N fertilization event. The bars indicate the standard deviation of the  
15 mean ( $\text{kg N ha}^{-1} \pm \text{SD}$ , n = 3) of each treatment for the sum of the four N fertilization events. See Fig. 1 for treatments  
16 codes. Different letters above the bars indicate significant differences among the different treatments for each soil, at  $p <$   
17 0.05.

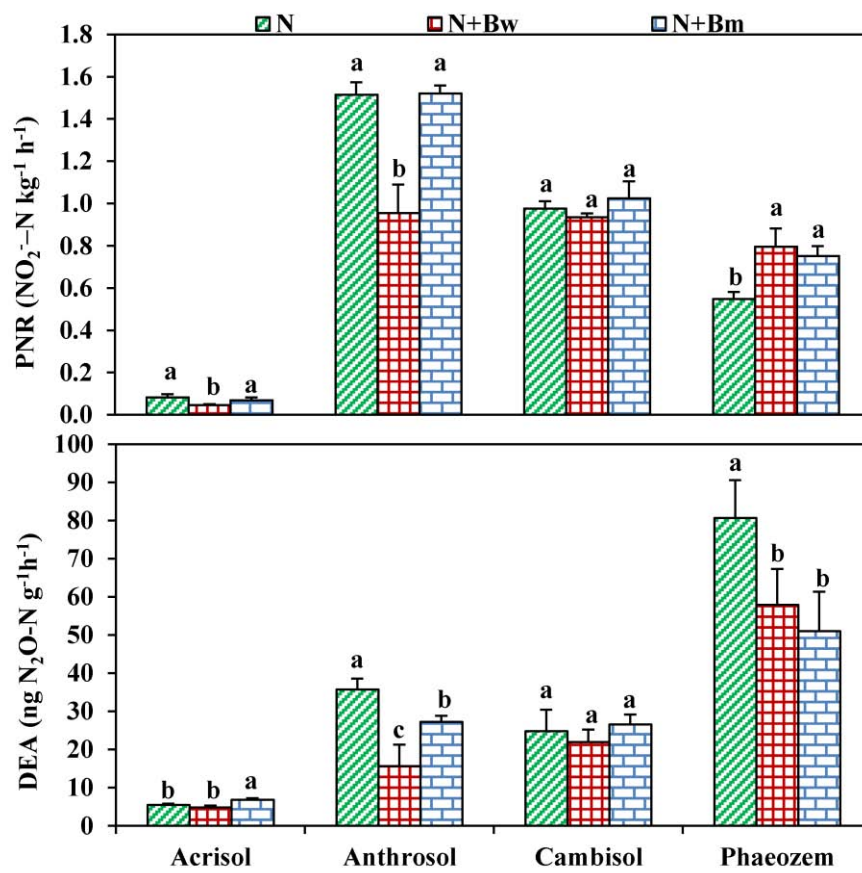

1

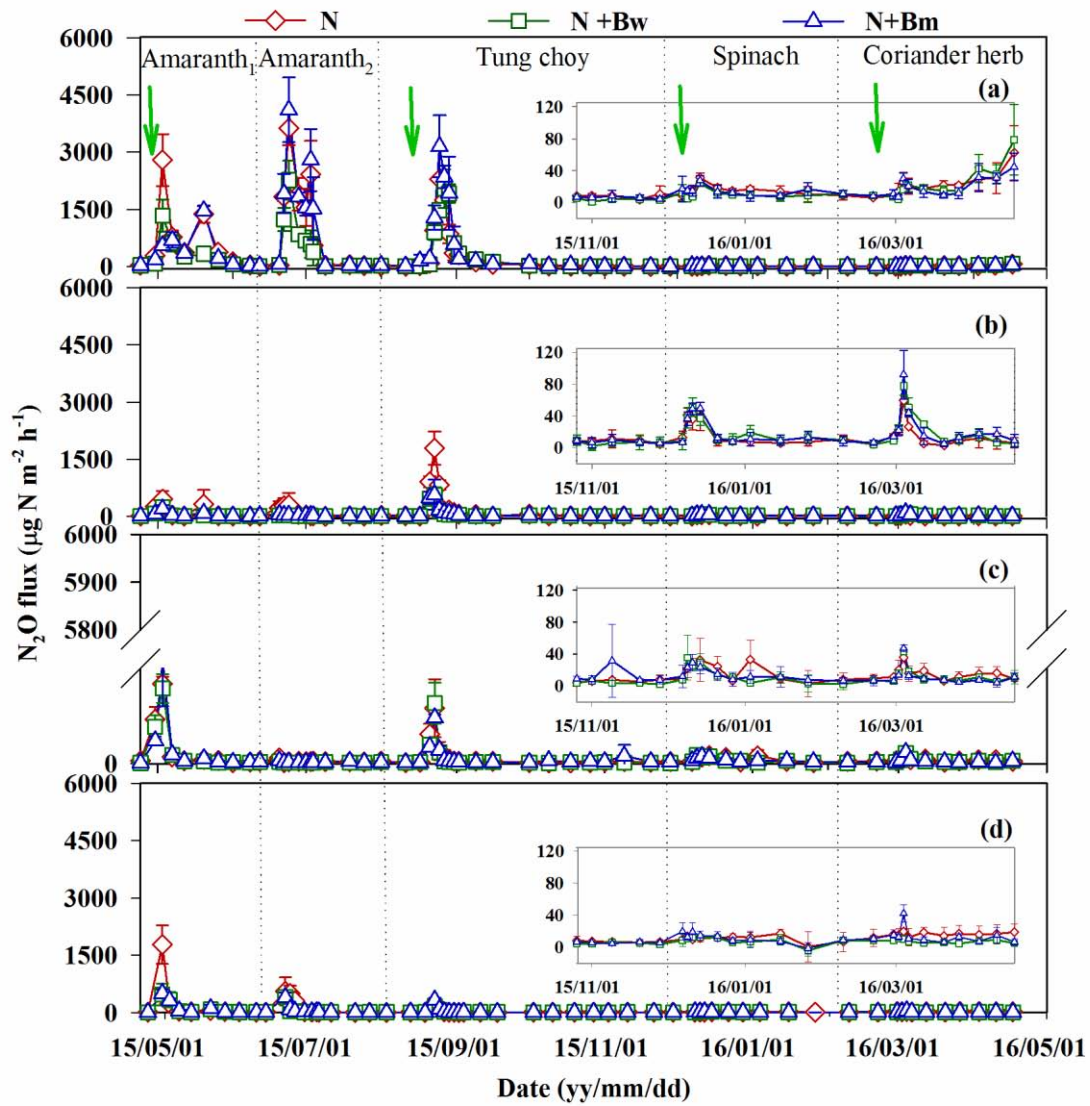

1

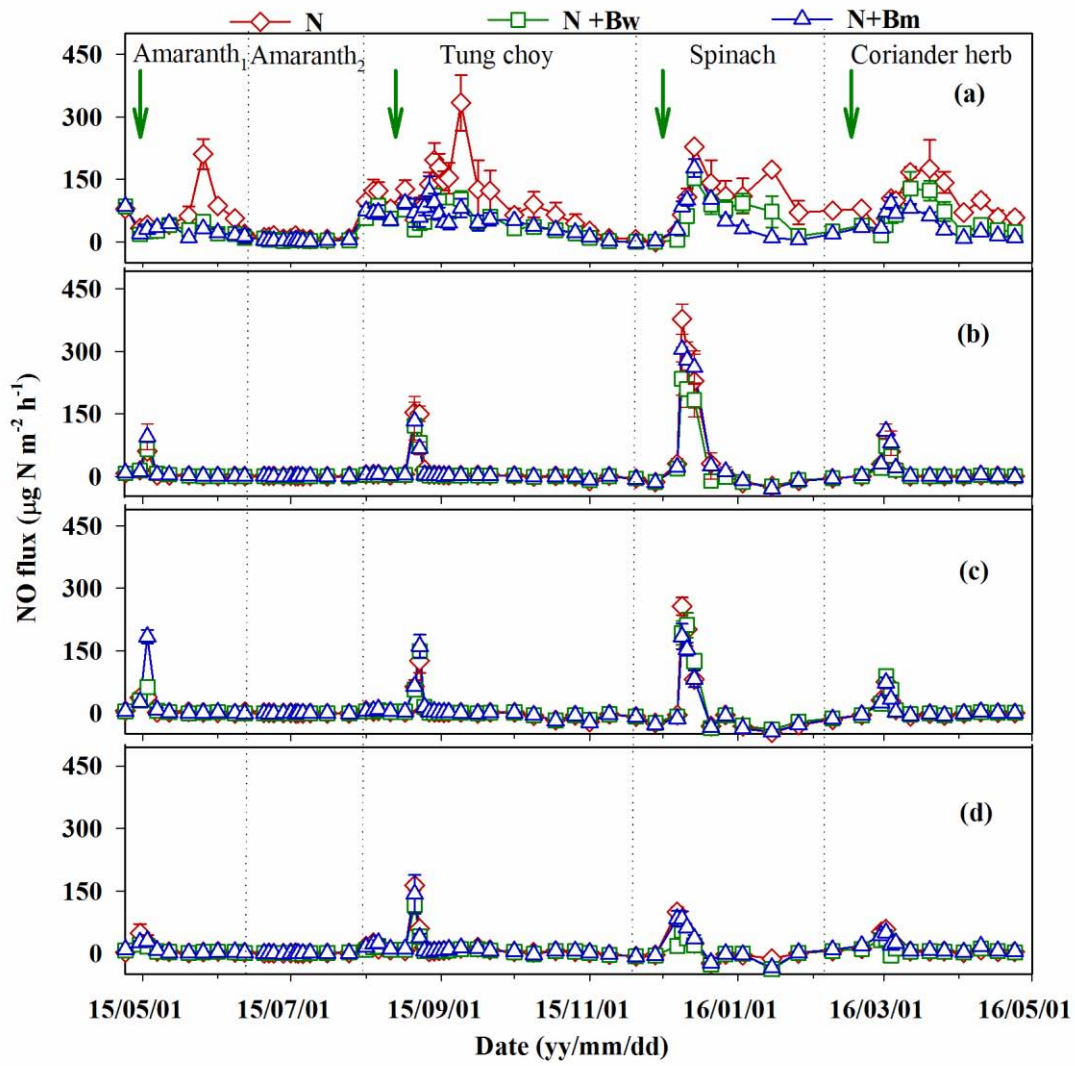

1

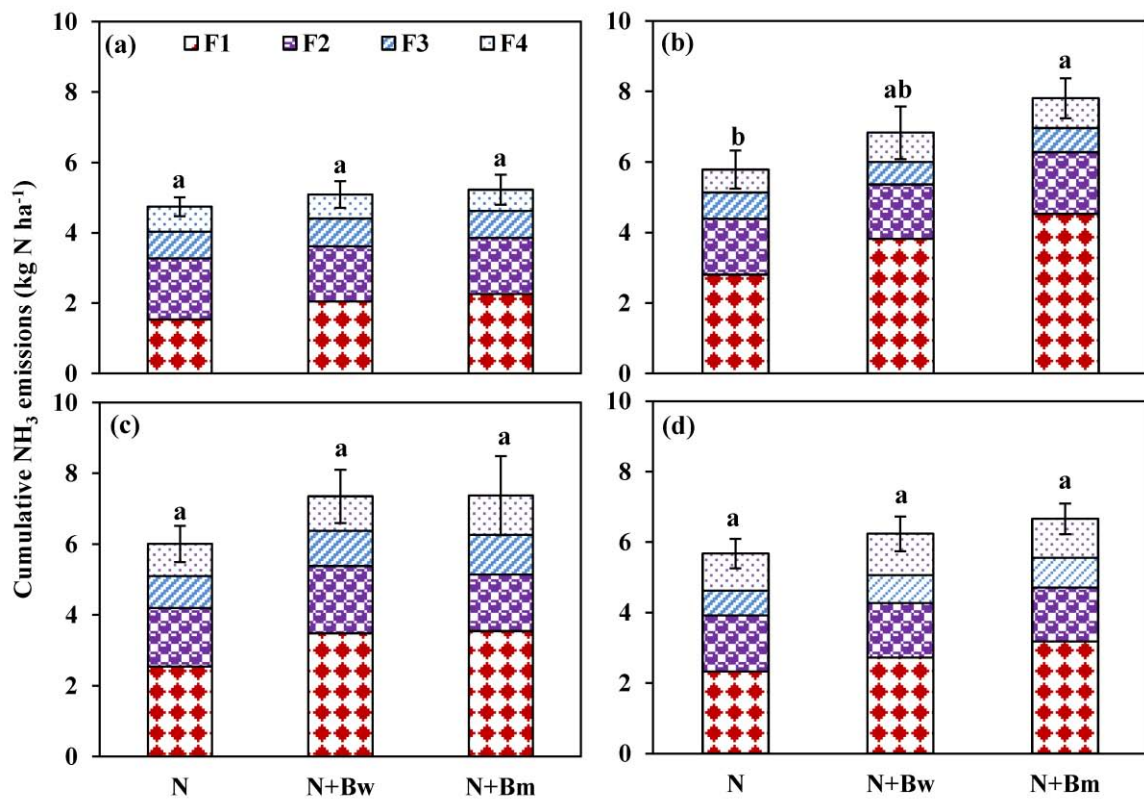

1



1 **Supplementary information**

2 **Fig. S1** Map showing the sampling sites in China.

3 **Fig. S2** Dynamics of water filled pore space (WFPS), air temperature and soil temperature during the vegetable  
4 cultivation period.

5 **Fig. S3** Scanning electron microscope (SEM) images of the biochars derived from Bw (a, b and c) and Bm (d, e and f).  
6 Same magnification for a and d ( $\times 50$ ), b and e ( $\times 400$ ) and c and f ( $\times 2000$ ).

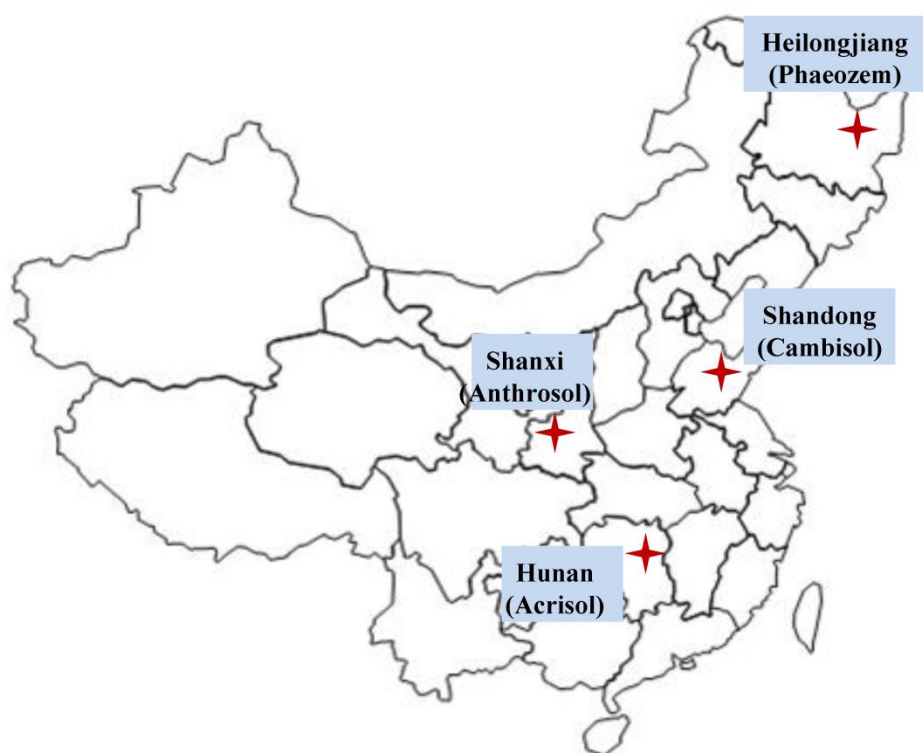

7

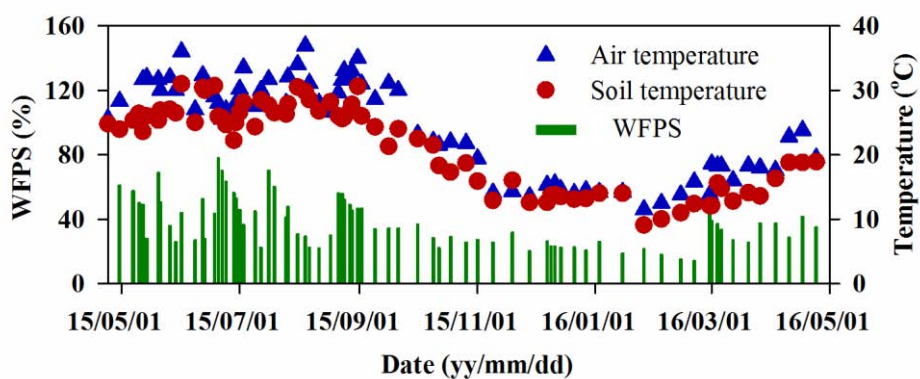

8

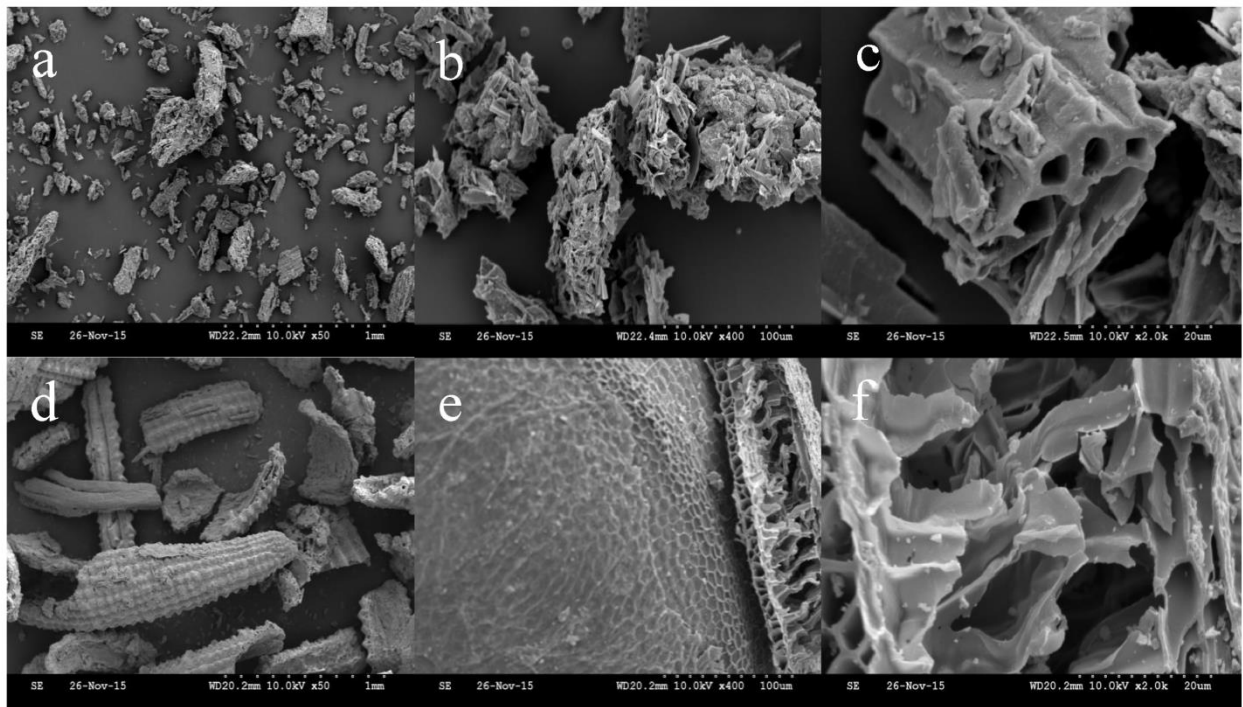

1

1 **Table S1**

2 Characteristics of the vegetable soils and biochars used in the experiment.

| Item                                                   | Vegetable soil |                        |                   |                   | Biochar |       |
|--------------------------------------------------------|----------------|------------------------|-------------------|-------------------|---------|-------|
|                                                        | HN             | SX                     | SD                | HLJ               | Bw      | Bm    |
| Texture                                                | sandy loam     | silt (sandy) clay loam | silt (sandy) loam | silt (sandy) loam |         |       |
| sand, %                                                | 47.1           | 17.7                   | 24.7              | 31.6              |         |       |
| silt, %                                                | 40.0           | 59.6                   | 60.4              | 52.8              |         |       |
| clay, %                                                | 12.9           | 22.7                   | 14.9              | 15.6              |         |       |
| total C (g kg <sup>-1</sup> )                          | 7.6            | 9.8                    | 8.2               | 26.8              | 449.1   | 461.2 |
| total N (g kg <sup>-1</sup> )                          | 1.2            | 1.4                    | 1.0               | 2.1               | 6.5     | 12.0  |
| C/N                                                    | 6.3            | 7.0                    | 8.2               | 12.8              | 69.1    | 38.4  |
| H (g kg <sup>-1</sup> )                                |                |                        |                   |                   | 10.5    | 16.1  |
| O (g kg <sup>-1</sup> )                                |                |                        |                   |                   | 52.4    | 96.7  |
| H/Corg                                                 |                |                        |                   |                   | 0.3     | 0.4   |
| pH                                                     | 5.6            | 7.6                    | 8.2               | 7.6               | 9.7     | 10.0  |
| EC (ds m <sup>-1</sup> )                               | 1.8            | 1.1                    | 0.2               | 0.2               | 10.6    | 3.3   |
| DOC (g kg <sup>-1</sup> )                              | 0.5            | 0.4                    | 0.2               | 0.7               | 0.9     | 1.3   |
| CEC, cmol kg <sup>-1</sup>                             | 6.1            | 13.2                   | 15.3              | 20.3              | 22.1    | 22.7  |
| WHC, %                                                 | 41.6           | 50.1                   | 54.4              | 59.6              | 362.0   | 304.1 |
| NH <sub>4</sub> <sup>+</sup> -N (mg kg <sup>-1</sup> ) | 105.3          | 32.2                   | 28.4              | 31.6              | 4.3     | 4.0   |
| NO <sub>3</sub> <sup>-</sup> -N (mg kg <sup>-1</sup> ) | 415.8          | 307.6                  | 21.2              | 30.8              | 6.1     | 3.2   |
| Bulk density (g cm <sup>-3</sup> )                     | 1.2            | 1.4                    | 1.1               | 1.1               |         |       |
| Surface area (m <sup>2</sup> g <sup>-1</sup> )         |                |                        |                   |                   | 21.3    | 9.3   |
| Ash content, %                                         |                |                        |                   |                   | 29.1    | 38.6  |

3 EC: electronic conductivity; DOC: dissolved organic carbon; CEC: cation exchange capacity; WHC: water holding capacity

**Table S2**

Crop rotation, tillage practices, and fertilizer application from April 2015 to April 2016.

| Crop                  | Date       | Agricultural activity               | Fertilizer N rate (kg N ha <sup>-1</sup> ) | Fertilizer P rate (kg N ha <sup>-1</sup> ) | Fertilizer K rate (kg N ha <sup>-1</sup> ) |
|-----------------------|------------|-------------------------------------|--------------------------------------------|--------------------------------------------|--------------------------------------------|
| Amaranth <sub>1</sub> | 04/22/2015 | Tillage                             |                                            |                                            |                                            |
|                       | 04/29/2015 | Fertilizer application and planting | 240                                        | 240                                        | 240                                        |
|                       | 06/13/2015 | Harvesting                          |                                            |                                            |                                            |
|                       | 06/14/2015 | Tillage                             |                                            |                                            |                                            |
| Amaranth <sub>2</sub> | 06/19/2015 | Fertilizer application and planting | 0                                          | 0                                          | 0                                          |
|                       | 07/31/2015 | Harvesting                          |                                            |                                            |                                            |
|                       | 07/32/2015 | Tillage                             |                                            |                                            |                                            |
| Tung choy             | 08/20/2015 | Fertilizer application and planting | 200                                        | 200                                        | 200                                        |
|                       | 11/27/2015 | Harvesting                          |                                            |                                            |                                            |
|                       | 11/28/2015 | Tillage                             |                                            |                                            |                                            |
| Spinach               | 12/06/2015 | Fertilizer application and planting | 150                                        | 150                                        | 150                                        |
|                       | 01/28/2016 | Harvesting                          |                                            |                                            |                                            |
|                       | 01/09/2016 | Tillage                             |                                            |                                            |                                            |
| Coriander herb        | 02/28/2016 | Fertilizer application and planting | 180                                        | 180                                        | 180                                        |
|                       | 04/29/2016 | Harvesting                          |                                            |                                            |                                            |
|                       | 04/30/2016 | Tillage                             |                                            |                                            |                                            |

1  
2  
3  
4  
5  
6  
7  
8  
9

**Biochar can decrease the gaseous reactive nitrogen intensity in**  
**intensive vegetable soils across mainland China**~~Effects of two-~~  
~~contrasting biochars on gaseous nitrogen emissions and intensity in-~~  
**intensive vegetable soils across mainland China**

Changhua Fan, Hao Chen, Bo Li, Zhengqin Xiong\*

Jiangsu Key Laboratory of Low Carbon Agriculture and GHGs Mitigation, College of Resources and Environmental  
Sciences, Nanjing Agricultural University, Nanjing 210095, China

\*Corresponding author (Z. Xiong): E-mail: zqxiong@njau.edu.cn;

Tel: +86-25-84395148; Fax: +86-25-84395210

1 **Highlights**

- 2 1. Two contrasting biochars affected ~~Gaseous-Nitrogen-Intensity~~ across 4 major vegetable soils in China.
- 3 2. Biochar affects gaseous-~~N<sub>r</sub>~~ or yield largely depending on soil types.
- 4 3. Both biochars decreased GN~~r~~I with Bw mitigated gaseous N~~r~~ whereas Bm improved yield.

1 **Abstract**

2 Biochar amendment to soil has been proposed as a strategy for sequestering carbon, mitigating climate change and  
3 enhancing crop productivity, but few studies have demonstrated the general effects of different feedstock-derived  
4 biochars on the various gaseous reactive nitrogen emissions (GN<sub>r</sub>E<sub>s</sub>, N<sub>2</sub>O, NO and NH<sub>3</sub>) simultaneously across the  
5 typical vegetable soils in China. A greenhouse pot experiment with five consecutive vegetable crops was conducted to  
6 investigate the effects of two contrasting biochar, namely, wheat straw biochar (Bw) and swine manure biochar (Bm) on  
7 GN<sub>r</sub>E<sub>s</sub>, vegetable yield and gaseous reactive nitrogen intensity (GN<sub>r</sub>I) in four typical vegetable soils from ~~the main~~  
8 ~~vegetable production regions~~ (Acrisol (Hunan province ~~(Acrisol<sub>HN</sub>)~~), Anthrosol (Shanxi province ~~(Anthrosol<sub>SX</sub>)~~),  
9 Cambisol (Shandong province ~~(Cambisol<sub>SD</sub>)~~) and Phaeozem (Heilongjiang province ~~(Phaeozem<sub>HLJ</sub>)~~) ~~which~~ ~~that~~ are  
10 representative of the intensive vegetable ecosystems across mainland China. Results showed that remarkable GN<sub>r</sub>E  
11 mitigation induced by biochar occurred in Anthrosol<sub>SX</sub> and Phaeozem<sub>HLJ</sub> soils, whereas enhancement of yield  
12 occurred in Cambisol<sub>SD</sub> and Phaeozem<sub>HLJ</sub> soils. Additionally, both biochars decreased GN<sub>r</sub>I with Bw performed  
13 better than Bm regarding N<sub>2</sub>O mitigation, ~~with Bw mitigating~~ N<sub>2</sub>O and NO emissions by 21.8–59.1 % and 37.0–  
14 49.5 % (except for Cambisol<sub>SD</sub>), respectively, while Bm improved yield by ~~4.0~~13.5–30.5 % (except for Acrisol<sub>HN</sub> and  
15 Anthrosol<sub>SX</sub>). Biochar amendments generally stimulated the NH<sub>3</sub> emissions with greater enhancement from ~~Futhermore~~.  
16 Bw performed better than Bm regarding N<sub>2</sub>O mitigation by 11.8–38.4 % and Bm promoted yield better than Bw by 11.6–  
17 20.2%. We can infer that Biochar amendments stimulated the NH<sub>3</sub> emissions (highest in Anthrosol<sub>SX</sub>), and Bm resulted  
18 in slightly higher NH<sub>3</sub> emissions than Bw did in all types of soils. Since the biochar's effects on the GN<sub>r</sub>E<sub>s</sub> and vegetable  
19 yield strongly depended on the attributes of the soil and biochar. Therefore, both soil type and biochar characteristics  
20 should be seriously considered before conducting large-scale application of biochar in order to achieve the maximum  
21 benefits under intensive greenhouse vegetable agriculture.

22 **Keyword:** Biochar, Intensive vegetable soil, Gaseous reactive nitrogen emissions (GN<sub>r</sub>E<sub>s</sub>), Gaseous reactive  
23 nitrogen intensity (GN<sub>r</sub>I)

带格式的：下标

带格式的：下标

带格式的：下标

## 1 **1 Introduction**

2 Agriculture ~~accounted~~-accounts for an estimated emission of 4.1 (1.7–4.8) Tg N yr<sup>-1</sup> for N<sub>2</sub>O and 3.7 Tg N yr<sup>-1</sup> for  
3 NO, contributing 60 % and 10 %, respectively, to the total global anthropogenic emissions, largely due to increases of N  
4 fertilizer application in cropland (Ciais, 2013). The concentration of atmospheric N<sub>2</sub>O, a powerful, long-lived,  
5 greenhouse gas, has increased from 270 parts per billion by volume (ppbv) in the pre-industrial era to ~ 324 ppbv (Ussiri  
6 and Lal, 2013); it has ~~298-265~~ times the global warming potential (GWP) of CO<sub>2</sub> on a 100-year horizon (IPCC, 2013)  
7 and also causes depletion of the ozone layer in the atmosphere (Ravishankara et al., 2009). In contrast, NO<sub>x</sub>, which is  
8 mainly emitted as nitric oxide (NO), does not directly affect the earth's radiative balance but catalyzes the production of  
9 tropospheric ozone (O<sub>3</sub>), which is a greenhouse gas associated with detrimental effects on human health (Anenberg et al.,  
10 2012) and crop production (Avnery et al., 2011). Additionally, along with the high nitrogen (N) application, ammonia  
11 volatilization is one of the major N loss pathways (Harrison and Webb, 2001) as well, with up to 90% coming from  
12 agricultural activities (Misselbrook et al., 2000; Boyer et al., 2002). As a natural component and a dominant atmospheric  
13 alkaline gas, NH<sub>3</sub> plays an important role in atmospheric chemistry and ambient aerosol formation (Langridge et al.,  
14 2012; Wang et al., 2015b). In addition to nutrient enrichment (eutrophication) of terrestrial and aquatic systems and  
15 global acidification of precipitation, NH<sub>3</sub> has also been shown to be a major factor in the formation of atmospheric  
16 particulate matter and secondary aerosols (Kim et al., 2006; Pinder et al., 2007), leading to potentially adverse effects on  
17 human and ecosystem health such as visibility degradation and threats to biodiversity (Powelson et al., 2008; Behera et al.,  
18 2013). Consequently, the release of various reactive N species results in lower N use efficiency in agricultural systems.

19 In China, vegetable production devotes an area of approximately  $24.7 \times 10^6$  ha, equivalent to 12.4% of the total  
20 available cropping area, and the production represented 52 % of the world vegetable production in 2012 (FAO, 2015).  
21 Intensified vegetable cultivation in China is characterized by high N application rates, high cropping index and frequent  
22 farm practices. Annual nitrogen fertilizer inputs for intensively managed vegetable cultivation in rapidly developing areas  
23 are 3–6 times higher than in cereal grain cultivation in China (Ju et al., 2006; Diao et al., 2013; Wang et al., 2015a). As a  
24 result, great concern exists about excess N fertilizer application, leading to low use efficiency in intensive vegetable  
25 fields in China (Deng et al., 2013; Diao et al., 2013). Meanwhile, intensive vegetable agriculture is considered to be an  
26 important source of N<sub>2</sub>O (Xiong et al., 2006; Jia et al., 2012; Li et al., 2015b; Zhang et al., 2015) and NO production  
27 (Mei et al., 2009). Moreover, ammonia volatilization is another important N pathway in fertilized soil, resulting in large  
28 losses of soil-plant N (Pacholski et al., 2008; Zhang et al., 2011). Therefore, the reduction of reactive N loss becomes a  
29 central environmental challenge to meet the joint challenges of high production and acceptable environmental  
30 consequences in intensive vegetable production (Zhang et al., 2013).



1 Biochar is the dark-colored, carbon (C)-rich residue of pyrolysis or gasification of plant biomass under oxygen  
2 ( $O_2$ )-limited conditions, specifically produced for use as a soil amendment (Sohi, 2012). The amendment of agricultural  
3 ecosystems with biochar has been proposed as an effective countermeasure for climate change (Smith, 2016). These  
4 additions would increase soil carbon storage (Mukherjee and Zimmerman, 2013; Stavi and Lal, 2013), decrease GHG  
5 emissions (Li et al., 2016), and improve soil fertility and crop production (Major et al., 2010; Liu et al., 2013). However,  
6 some recent studies have reported no difference or even an increase in soil  $N_2O$  emissions induced by biochar application  
7 from different soils (Saarnio et al., 2013; Wang et al., 2015a). Still,  $NH_3$  volatilization was enhanced by biochar  
8 application in pasture soil (Clough et al., 2010), vegetable soil (Sun et al., 2014) and paddy soil in the wheat-growing  
9 season (Zhao et al., 2014). Additionally, crop productivity responses to biochar amendments differed among various  
10 biochars (Cayuela et al., 2014). These inconsistent results suggest that current biochar application to soil is not a  
11 “one-size fit-all paradigm” because of the variation in the physical and chemical characteristics of the different biochars,  
12 soil types and crop species (Field et al., 2013; Cayuela et al., 2014). Moreover, limited types of biochar (Spokas and  
13 Reicosky, 2009) and soil (Sun et al., 2014) were involved in the experiments in previous studies. Thus, the evaluation of  
14 the different types of biochar under the typical soils is imperative to gain a comprehensive understanding of potential  
15 interactions before the large-scale application of biochars in intensive vegetable cropping system in China.

16 Therefore, a greenhouse pot experiment was conducted in an effort to investigate the effects of different types of  
17 biochar on gaseous reactive nitrogen emissions ( $GNrEs$ ), namely,  $N_2O$ ,  $NO$  and  $NH_3$ , simultaneously in four typical  
18 intensified vegetable soils across main vegetable production areas of mainland China. We hypothesized that: 1) biochar  
19 amendment could affect  $GNrEs$ , vegetable yield and  $GNrI$  in vegetable soils across mainland China, 2) those influences  
20 would vary among biochar and soil types. Overall, the objectives of this research were to gain a comprehensive insight  
21 into the effects of the different types of biochar on the  $GNrEs$ , vegetable yield and gaseous reactive nitrogen intensity  
22 ( $GNrI$ ) in intensively managed vegetable production in China.

## 1 2 Materials and methods

### 2 2.1. Experimental soil and biochar

3 Four typical greenhouse vegetable cultivation sites with a long history (more than 10 years) of conventional  
4 cultivation were selected from Northeast, Northwest, Central and Eastern China (Fig. S1), namely, Phaeozem, Anthrosol,  
5 Acrisol and Cambisol (FAO and ISRIC, 2012). Those four types of vegetable soil were collected from: (1) Jiamusi  
6 (46°48'N, 130°12'E), Heilongjiang province-~~(HLJ)~~; (2) Yangling (34°18'N, 108°2'E), Shanxi province-~~(SX)~~; (3)  
7 Changsha (28°32'N, 113°23'E), Hunan province-~~(HN)~~ and (4) Shouguang (36°56'N, 118°38'E), Shandong province  
8 (SD), respectively, ~~which were collected and~~ represented a range of differences in physicochemical properties and  
9 regions (Table S1). Soil samples were manually collected from the cultivated layer (0–20 cm) after the local vegetable  
10 harvest in April, 2015. The samples were air-dried and passed through a 5 mm stainless steel mesh sieve and  
11 homogenized thoroughly. Any visible roots and organic residues were removed manually before being packed with the  
12 necessary amount of soil to achieve the initial field bulk density. Each pot received 15 kg of 105 °C  
13 dry-weight-equivalent fresh soil. For each of the biochar amendment pots, 282.6 g pot<sup>-1</sup> sieved biochar (2 mm) was  
14 mixed with the soil thoroughly before the experiment, which was equivalent to a 40 t ha<sup>-1</sup> biochar dose (dry weight). No  
15 more biochar was added later in the experimental period.

16 Two types of biochar, derived from two common agricultural wastes in China were used: wheat straw and swine  
17 manure, hereafter referred to as Bw and Bm, respectively (Table S1). The Bw was produced at the Sanli New Energy  
18 Company in Henan, China, by pyrolysis and thermal decomposition at 400–500 °C. The Bm was produced through  
19 thermal decomposition at 400 °C by the State Key Laboratory of Soil Science and Sustainable Agricultural, Institute of  
20 Soil Science, Chinese Academy of Sciences. In accordance with Lu (2000), the SOC was measured by wet digestion with  
21 H<sub>2</sub>SO<sub>4</sub>–K<sub>2</sub>Cr<sub>2</sub>O<sub>7</sub>, TN was determined by semi-micro Kjeldahl digestion, and soil texture was determined with the pipette  
22 method. The soil pH and biochar pH were measured in deionized water at a volume ratio of 1:2.5 (soil to water) with a  
23 PHS-3C mv/pH detector (Shanghai Kangyi Inc. China). Biochar content of hydrogen (H) was measured by elemental  
24 analysis after dry combustion (Euro EA, Hekatech GmbH, Wegberg, Germany). The oxygen content of biochar was  
25 measured with the same device after pyrolysis of the sample at 1000 °C followed by reduction of the evolved O<sub>2</sub> to CO  
26 and quantification by GC-TCD. The soil NO<sub>3</sub><sup>-</sup>-N and NH<sub>4</sub><sup>+</sup>-N were measured following the two-wavelength ultraviolet  
27 spectrometry and indophenol blue methods, respectively, using an ultraviolet spectrophotometer (HITACHI, UV-2900,  
28 Tokyo, Japan). Electric conductivity (EC) was measured by using a Mettler-Toledo instrument (FE30-K, Shanghai, China)  
29 at a 1:5 (w:v) soil to water ratio. Cation exchange capacity (CEC) was determined using the CH<sub>3</sub>COONH<sub>4</sub> method.  
30 Dissolved organic carbon (DOC) was extracted from 5 g of the biochar/soil with an addition of 50 ml deionized water

1 and measured by a TOC analyzer (TOC-2000/3000, Metash Instruments Co., LTD, Shanghai, China). Ash content was  
2 measured by heating the biochars at 750 °C for 4 h. The specific surface area of the biochar material was tested using the  
3 Brunauer–Emmett–Teller (BET) method, from which the N adsorption–desorption isotherms at 77 K were measured by  
4 an automated gas adsorption analyzer ASAP2000 (Micromeritics, Norcross, GA) with + 5% accuracy. Scanning electron  
5 microscopy (SEM) imaging analysis was conducted using a HITACHI S-3000N scanning electron microscope.

## 6 *2.2. Experimental set-up and management*

7 The pot experiments were performed at the greenhouse experimental station of Nanjing Agricultural University,  
8 China. Five vegetable crops were grown successively in the four vegetable soils during the experimental period. For each  
9 type of soil, three treatments with three replicates were arranged in a ~~completely~~ random design: urea without biochar  
10 (N), urea with wheat straw biochar (N+Bw), urea with swine manure biochar (N+Bm). In addition, phosphate and  
11 potassium fertilizers in the form of calcium magnesium phosphate and potassium chloride, together with urea, were  
12 broadcasted and mixed with soil thoroughly prior to sowing the vegetables. No topdressing events occurred because of  
13 the frequent cultivation and short growth period for the leafy vegetables. Based on the vegetable growth, all pots received  
14 equal amounts of water and no precipitation. Detailed information on the pot management practices is provided in Table  
15 S2.

16 Each pot consists of a 30 cm × 30 cm (height × diameter) cylinder made of polyvinyl chloride (PVC). The top of  
17 each pot was surrounded by a special water-filled trough collar, which allowed a chamber to sit on the pot and prevent  
18 gas exchange during the gas-sampling period. Small holes (diameter of 1 cm) at the bottom of the pots were designed for  
19 drainage. To prevent soil loss, a fine nylon mesh (< 0.5 mm) was attached to the base of the soil cores before packing.

## 20 *2.3. Measurement of N<sub>2</sub>O, NO and NH<sub>3</sub>*

21 The NO and N<sub>2</sub>O fluxes were measured simultaneously from each vegetable cultivation using a static opaque  
22 chamber method (Zheng et al., 2008; Yao et al., 2009). A square PVC chamber of 35 cm × 35 cm × 40 cm (length ×  
23 width × height) was temporarily mounted on the pot for gas flux measurement. The chamber was coated with sponge and  
24 aluminum foil outside to prevent solar radiation heating the chamber. Gas samples for flux measurements were collected  
25 between 8 and 10 a.m. on each measuring day to minimize the influence of diurnal temperature variation. Gas fluxes  
26 were usually measured once a week and every other day for one week following fertilizer application. To measure the  
27 N<sub>2</sub>O flux, four samples were collected from the headspace chamber using 20 ml polypropylene syringes at 0, 10, 20, and  
28 30 min after chamber closure. The gas concentrations in the samples were analyzed within 12 h after sampling using an  
29 Agilent 7890A gas chromatograph equipped with an electron capture detector (ECD) for N<sub>2</sub>O detection. The carrier gas  
30 was argon-methane (50 %) at a flow rate of 40 ml min<sup>-1</sup>. The column and ECD temperatures were maintained at 40 and

1 300 °C, respectively. The gas chromatography configurations described by Wang et al. (2013) were adopted for the gas  
2 concentration analysis. N<sub>2</sub>O flux was calculated using the linear increases in gas concentration with time. Sample sets  
3 were rejected unless they yielded a linear regression value of R<sup>2</sup> > 0.90.

4 For each NO flux measurement, gas samples were collected from the same chamber that was used for the N<sub>2</sub>O flux  
5 measurements (Yao et al., 2009). Before closing the chamber, an approximately 1.0 L gas sample from the headspace of  
6 each chamber was extracted into an evacuated sampling bag (Delin Gas Packing Co., LTD, Dalian, China), and this  
7 measurement was regarded as time 0 min for NO analysis. After 30 min under chamber enclosure conditions (i.e., after  
8 the N<sub>2</sub>O sample collections were completed), another headspace gas sample with the same volume was extracted from  
9 each chamber into another evacuated bag. Within 1 h after sampling, NO concentrations were analyzed by a model 42i  
10 chemiluminescence NO–NO–NO<sub>x</sub> analyzer (Thermo Environmental Instruments Inc., Franklin, MA, USA). The NO  
11 fluxes were derived from the concentration differences between the two collected samples. The NO<sub>x</sub> analyzer was  
12 calibrated by a model 146i dynamic dilution calibrator system at the end of each crop-growing season.

13 The mean flux of N<sub>2</sub>O or NO during the experiment period was calculated as the average of all measured fluxes,  
14 which were weighted by the interval between the two measurements (Xiong et al., 2006). The cumulative N<sub>2</sub>O was  
15 calculated as the product of the mean flux and the entire duration.

16 The NH<sub>3</sub> volatilization was determined using the ventilation method (Zhao et al., 2010). The  
17 phosphoglycerol-soaked sponge was replaced every day after each fertilization event for approximately one week. The  
18 phosphoglycerol-soaked sponges used to collect the NH<sub>3</sub> samples were immediately extracted with 300 mL potassium  
19 chloride (KCl) solution (1 mol L<sup>-1</sup>) for 1 h. The concentration of ammonia nitrogen (NH<sub>4</sub><sup>+</sup>-N) was measured using the  
20 indophenol blue method at 625 nm (Sororzano, 1969) by ultraviolet spectrophotometry (HITACHI, UV-2900, Tokyo,  
21 Japan, with 0.005 absorbance of photometric accuracy). The cumulative seasonal NH<sub>3</sub> volatilization was the sum of the  
22 daily emissions during the measurement period.

#### 23 2.4. Auxiliary measurements

24 Simultaneously with the determination of trace gas fluxes, the air temperature and the soil temperature at a depth of  
25 5 cm were measured using thermally sensitive probes at each sampling date. Soil water content was also measured using  
26 a portable water detector (Mode TZS-1K, Zhejiang Top Instrument Corporation Ltd., China) by the frequency domain  
27 reflectometer method at a depth of 5 cm. Measured soil water contents (v/v) were converted to water filled pore space  
28 (WFPS) with the following equation:

$$29 \text{ WFPS} = \text{volumetric water content (cm}^3 \text{ cm}^{-3}\text{)} / \text{total soil porosity (cm}^3 \text{ cm}^{-3}\text{)} \quad (1)$$

30 Here, total soil porosity = [1 - (soil bulk density (g cm<sup>-3</sup>) / 2.65)] with an assumed soil particle density of 2.65 (g cm<sup>-3</sup>).

1 The total soil bulk density was determined with the cutting ring method according to Lu (2000).

2 After each vegetable crop reached physiological maturity, the fresh vegetable yield was measured by weighing the  
3 whole aboveground and belowground biomass in each pot.

4 
$$\text{GNrE} = \text{cumulative N}_2\text{O} + \text{cumulative NO} + \text{cumulative NH}_3 \text{ emissions (kg N ha}^{-1}\text{)} \quad (2)$$

5 
$$\text{GNrI} = \text{GNrE} / \text{vegetable fresh yield (kg N t}^{-1} \text{ yield)} \quad -(3)$$

6 After the one-year pot experiment, a soil sample from each pot was blended carefully. One subsample was stored at  
7 4 °C for determination of microbial biomass carbon (MBC), potential nitrification rate (PNR) and denitrification enzyme  
8 activity (DEA) within 3 days. Another subsample was air-dried for analysis of SOC, TN, pH and EC. MBC was  
9 determined by substrate-induced respiration using a gas chromatography (Anderson and Domsch 1978). PNR was  
10 measured using the chlorate inhibition soil-slurry method as previously described (Kurola et al., 2005) with  
11 modifications (Hu et al., 2016). DEA was quantified as described by Smith and Tiedje (1979).

#### 12 2.5. Data processing and statistics

13 One-way ANOVA was performed to test the effects of the treatments on cumulative N<sub>2</sub>O, NO and NH<sub>3</sub> emissions;  
14 GNrE; vegetable yield and GNrI. Two-way ANOVA was used to analyze the effects of the biochar type; soil type; and  
15 their interactions on N<sub>2</sub>O, NO and NH<sub>3</sub> emissions, vegetable yield, GNrE and GNrI throughout the experimental period.  
16 Multiple comparisons among the treatments were further explained using Tukey's HSD test. Significant differences were  
17 considered at  $P < 0.05$ . All statistical analyses were performed using JMP ver. 7.0 (SAS Institute, Cary, NC, USA, 2007).  
18 Pearson's correlation analysis was used to determine whether there were significant interrelationships between N<sub>2</sub>O/NO  
19 and PNR or DEA in each soil, using SPSS window version 18.0 (SPSS Inc., Chicago, USA).

### 1 3. Results

#### 2 3.1. Soil responses to biochar amendment

3 Obvious differences in all observed soil properties existed among soil types (Table 1,  $p < 0.001$ ), suggesting the  
4 wide variations of soil characters across mainland China. Additionally, biochar amendments had significant influences on  
5 all the soil properties (Table 1,  $p < 0.05$ ). Compared with N treatments, biochar amendments increased the SOC, TN and  
6 EC by 20.4–135.0 %, 0.5–21.2 % and 2.4–38.1 %, respectively, across all the soils. Compared with Bw, Bm amendment  
7 resulted in higher contents of SOC and TN by 5.8–20.5 % and 9.5–14.2 %, respectively, whereas EC values were higher  
8 by 3.3–21.5 % induced by Bw than Bm amendment over all soils. Additionally, biochar amendments significantly  
9 ~~increased/enhanced~~ soil pH by 0.27–0.64 and 0.08–0.10 units compared with N treatment in Acrisol<sup>HN</sup> and Anthrosol<sup>SX</sup>  
10 soils ( $p < 0.05$ ), respectively, and ~~higher values were detected with Bm performed better~~ than Bw ~~on increasing soil pH~~  
11 ~~amendment in all soils~~ Acrisol. Furthermore, biochar amendments tended to increase MBC in Cambisol<sup>SD</sup> and Phaeozem  
12 HLJ soils, and Bm performed better in MBC enhancements than Bw in Phaeozem<sup>all soils</sup>.

13 As shown in Fig. 1, no consensus effects on PNR and DEA were observed with biochar amendments across all soils.  
14 Compared with N treatment, biochar amendments significantly increased PNR in Phaeozem<sup>HLJ</sup> while exerted no  
15 influences on Cambisol<sup>SD</sup> soil (Fig. 1a). Compared with Bw, Bm amendment significantly increased PNR in Acrisol<sup>HN</sup>  
16 and Anthrosol<sup>SX</sup> soils. Moreover, compared with N, biochar amendments ~~significantly reduced~~ DEA ~~in most soils,~~  
17 ~~significantly in Anthrosol and Phaeozem~~ by an average of 40.1 and 37.8 % ~~in SX and HLJ (Fig. 1b,  $p < 0.05$ ),~~  
18 ~~respectively, while producing no influence in SD soils (Fig. 1b)~~. In comparison with Bw, remarkable enhancements in  
19 DEA were observed by 42.5 and 74.4 % with Bm amendment in Acrisol<sup>HN</sup> and Anthrosol<sup>SX</sup> soils, respectively ( $p <$   
20  $0.05$ ).

#### 21 3.2. Seasonal variations of $N_2O$ and NO emissions

22 The dynamics of  $N_2O$  fluxes from all N-applied treatments in the four vegetable soils were relatively consistent and  
23 followed a sporadic and pulse-like pattern that was accompanied with fertilization, tillage and irrigation (Fig. 2). In  
24 addition, peak  $N_2O$  fluxes varied greatly. Most of the  $N_2O$  emissions occurred during the Amaranth and Tung choy  
25 growing periods, and there were several small emissions peaks during the Spinach and Coriander herb growing periods  
26 due to lower N application rate (Table S2), soil temperature and water content (Fig. S2). The highest peaks of  $N_2O$   
27 emissions from Acrisol<sup>HN</sup>, Anthrosol<sup>SX</sup>, Cambisol<sup>SD</sup> and Phaeozem<sup>HLJ</sup> were 4133.7, 1784.0, 432.4 and 1777.2  $\mu\text{g N}$   
28  $\text{m}^{-2} \text{h}^{-1}$ , respectively. Although biochar (Bw and Bm) application did not significantly alter the seasonal pattern of the  
29  $N_2O$  fluxes, they greatly lowered some peaks of  $N_2O$  emissions in the Anthrosol<sup>SX</sup> and Phaeozem by 8.7–74.4% and  
30 23.6–73.6%, respectively (Fig. 2b and d).

1 Clearly, the NO fluxes demonstrated similar seasonal dynamics to the N<sub>2</sub>O fluxes (Fig. 3). Some relatively high  
2 peak NO fluxes were still observed in the Spinach and Coriander herb planting seasons even though relatively low  
3 temperatures occurred during these periods, primarily due to lower soil moisture which was suitable for NO production.  
4 The NO fluxes ranged from -44.6 to 377.6 μg N m<sup>-2</sup> h<sup>-1</sup> across all soil types. Furthermore, some NO peaks were  
5 significantly weakened with the Bw and Bm in the AcrisolHN soil (Fig. 3a).

### 6 3.3. Cumulative N<sub>2</sub>O, NO and NH<sub>3</sub> emissions

7 Cumulative N<sub>2</sub>O emissions varied greatly among soil types (Table 2,  $p < 0.001$ ), from 1.97 to 31.56 kg N ha<sup>-1</sup> across  
8 all the soils during the vegetable cultivation period (Table 3a). Biochar amendments had significant influences on the  
9 cumulative N<sub>2</sub>O emissions, reducing N<sub>2</sub>O emissions by 13.7–41.6 % (Table 2). In comparison with the N treatment,  
10 biochar amendment ~~resulted in no consistent effects on N<sub>2</sub>O emissions over all soils~~ decreased N<sub>2</sub>O emissions by an  
11 average of 56.4 % and 47.5 % in SX and HLJ (Table 3a,  $p < 0.05$ ), ~~respectively, with no remarkable influence in SD soil,~~  
12 indicating significant interactions between biochar and soil types (Table 2,  $p < 0.001$ ). ~~Additionally, Compared with Bm,~~  
13 Bw amendment performed better mitigation effects which decreased N<sub>2</sub>O emissions by 11.8–38.4 % across all the soils,  
14 significantly in AcrisolHN soil in relation to Bm (Table 3a,  $p < 0.05$ ). ~~In comparison with N<sub>2</sub>O emission, the values of~~  
15 ~~cumulative NO emissions~~ was ~~were~~ much smaller than those of N<sub>2</sub>O emissions, with a remarkable variation of 0.20–8.99  
16 kg N ha<sup>-1</sup> across all soils (Table 3b). Though pronounced effects on NO emissions with a reduction by average of 45.8 %  
17 (Table 2,  $p < 0.05$ ), biochar amendments had no consensus effects across soils, ~~reducing NO emissions in HN soil~~ (Table  
18 ~~3b,  $p < 0.05$ ) and producing no remarkable influence on SD soil,~~ which suggested significant interactions between  
19 biochar and soil types (Table 2,  $p < 0.001$ ). Compared with Bm, Bw amendment significantly reduced NO emissions in  
20 AnthrosolSX and PhaeozemHLJ soils (Table 3b,  $p < 0.05$ ). ~~Moreover, As shown in Table 4,~~ N<sub>2</sub>O emissions had positive  
21 relationships with DEA both in AnthrosolSX and PhaeozemHLJ soils, and were affected positively with PNR in  
22 AcrisolHN soil (Table 4). Additionally, NO emissions had positive correlations with both PNR and DEA in AnthrosolSX  
23 ~~soil~~. However, neither N<sub>2</sub>O nor NO emissions were influenced significantly by PNR and DEA in CambisolSD soils.

24 As is shown in Table 3c, the cumulative NH<sub>3</sub> emissions fluctuated greatly from 4.72–7.57 kg N ha<sup>-1</sup> across all the  
25 soils. ~~Though significantly enhancing NH<sub>3</sub> emissions (Table 2), B~~biochar amendments produced no significant influences  
26 on the NH<sub>3</sub> emissions relative to N treatment in most soils (Tables 2 and 3c). A tendency was found for the cumulative  
27 NH<sub>3</sub> emissions in N+Bm to be higher than those in the N+Bw treatment, although this difference was not remarkable  
28 within each soil. Additionally, stimulation effects were consistently present after the first fertilization event in each type  
29 of soil (Fig. 4).

### 30 3.4. Vegetable yield and gaseous reactive N emissions intensity during the five-vegetable crop rotation

1 The vegetable yields for the five consecutive vegetable crops are presented in Table 3e. Pronounced differences  
2 existed among all soils (Table 2,  $p < 0.001$ ). Biochar amendments exerted no significant effects on vegetable yield (Table  
3 2). Compared with the N treatment, biochar amendments were prone to increase vegetable yield in CambisolSD and  
4 PhaeozemHLJ soils against AcrisolHN and AnthrosolSX soils (Tables 3e), denoting pronounced interactions between  
5 soil and biochar (Table 2,  $p < 0.05$ ). Compared with Bm, Bw amendment lowered total yield over all the soils (Table 3e),  
6 significantly in AcrisolHN and CambisolSD soils ( $p < 0.05$ ).

7 Table 3f presents the GNrI during the whole experiment period, with a pronounced variation among soils (Table 2,  $p$   
8  $< 0.001$ ). The GNrI was greatly affected by biochar amendment during the whole experiment period (Table 2,  $p < 0.01$ ).  
9 Compared to N treatment, biochar amendments reduced the GNrI by 4.3–27.8 % across all soils, significantly in  
10 AnthrosolSX and PhaeozemHLJ soils (Table 3f,  $p < 0.05$ ). Moreover, there were no remarkable differences between Bw  
11 and Bm throughout all soils.



## 4. Discussion

### 4.1. Biochar effects on $\text{GNrEs}$ across different soil types

The effects of biochar amendment on the  $\text{N}_2\text{O}$  and  $\text{NO}$  emissions may be positive, negative or neutral, largely depending on the soil condition and the inherent characteristics of the biochar (Spokas and Reicosky, 2009; Nelissen et al., 2014). In our study, effects of two biochars on the  $\text{N}_2\text{O}$  and  $\text{NO}$  emissions did not follow a consensus trend across the four typical vegetable soils (Table 3a, b). In agreement with Cayuela et al. (2014), who reported that the role of biochar in mitigating  $\text{N}_2\text{O}$  emission was maximal in soils close to neutrality, remarkable mitigation effects were observed in [Anthrosol<sub>SX</sub>](#) and [Phaeozem<sub>HLJ</sub>](#) with the biochar amendments (Table 3a). These findings potentially resulted from the effects of the biochars on soil aeration, C/N ratio and pH, which affected the N dynamics and N cycling processes (Zhang et al., 2010; Ameloot et al., 2015). ~~Moreover, mitigation of  $\text{N}_2\text{O}$  emissions induced by biochar was probably due to the decreased denitrification in [SX](#) and [HLJ](#) soils (Fig.1b and Table 4).~~ In line with Obia et al. (2015), biochar decreased  $\text{NO}$  emissions in low-pH [Acrisol<sub>HN</sub> soil](#) (Table 3b), probably by inducing denitrification enzymes with higher activity, and then resulted in less  $\text{NO}$  accumulation relative to  $\text{N}_2$  production. Moreover, the liming effects of biochar prevented the chemical decomposition of  $\text{NO}_2^-$  to  $\text{NO}$  (Islam et al., 2008), leaving only enzymatically produced  $\text{NO}$  to accumulate. However, neither  $\text{N}_2\text{O}$  nor  $\text{NO}$  emission was significantly influenced by PNR or DEA, suggesting other processes might play vital roles in [Cambisol<sub>SD</sub> soil](#). Besides nitrification and denitrification, nitrifiers denitrification (Wrage et al., 2001) and heterotrophic nitrification (Zhu et al., 2011) can be important processes for producing  $\text{N}_2\text{O}/\text{NO}$  as well, especially in vegetable soils with low pH, low carbon content and high N content (Wrage et al., 2001). Ma et al. (2015) speculated that nitrifier denitrification was the main process producing  $\text{N}_2\text{O}$  in the North China Plain ([Cambisol<sub>SD</sub> soil](#) within this region). In addition, surplus N input in vegetable systems probably masked the beneficial effects of the biochar addition on the N transformation (Wang et al., 2015a). Therefore, the underlying mechanism of how biochar affect those processes needs to be illustrated in the further research.

On the other hand, different biochars may not produce universal influences on  $\text{N}_2\text{O}$  emissions for the same soil due to the distinct properties of the biochar (Spokas and Reicosky, 2009). In the current study, overall, in comparison with Bm, the Bw amendment had more effective mitigation effects on  $\text{N}_2\text{O}$  and  $\text{NO}$  emissions (Table 3a, b), largely due to the following reasons. First, compared with Bw, the contents of the TN and DOC in Bm were 1.8- and 1.4-fold (Table S1), respectively, which might supply extra N or C source for heterotrophic nitrification in the acidic [Acrisol<sub>HN</sub> soil](#), which made Bm ineffective for reducing the  $\text{N}_2\text{O}$  emissions (Table 3a). This result was in accordance with Li et al. (2015a), who observed that biochar amendment had no significant influence on the cumulative  $\text{N}_2\text{O}$  emissions, and even higher  $\text{N}_2\text{O}$  emissions occurred when biochar was input. Additionally, as shown in Fig.1, Bm was more prone to stimulate PNR

1 and DEA, thus displaying lower mitigation ability than Bw. Second, compared with Bm, the C/N ratio was  
2 approximately twofold in Bw (Table S1), presumably leading to more inorganic nitrogen being immobilized in biochar  
3 with a higher C/N ratio (Ameloot et al., 2015), decreasing the available N for microorganisms. Last, as presented in Fig.  
4 S3 and Table S1, Bw had more pores and surface area, having a better advantage over Bm in absorbing NO accordingly.  
5 Others have found that the lower mitigation capacity of high-N biochars (e.g., manures or biosolids) is probably due to  
6 the increased N release in the soil from the biochar (Schouten et al., 2012). To our knowledge, very few studies have  
7 investigated biochar effects on NO emissions (Nelissen et al., 2014; Obia et al., 2015), and the mechanisms through  
8 which biochar influence NO emissions are not elucidated yet. Therefore, more research is needed to clarify the  
9 underlying mechanisms of biochar on NO emission.

10 Intensive managed soils receiving fertilizer such as urea or anhydrous NH<sub>3</sub> and ruminant urine patches are potential  
11 hot spots for NH<sub>3</sub> formation, where the use of biochar is expected to retain NH<sub>3</sub>-N in the soil system (Clough and  
12 Condon, 2010). Actually, the effects of biochar amendments on NH<sub>3</sub> volatilization largely depend on soil characteristics,  
13 biochar types and duration time. Soil texture is an important factor impacting NH<sub>3</sub> transfer and release. More clay  
14 contents were present in the ~~Anthrosol SX soil~~ (Table S1), which was limited in large soil pores, thus, the addition of  
15 porous biochar could enhance the soil aeration, promoting NH<sub>3</sub> volatilization (Sun et al., 2014). Additionally, it was  
16 worthy to note that cumulative NH<sub>3</sub> emissions were slightly higher in soils with the Bm than those with the Bw  
17 amendment (Fig. 4 and Table 3c) and that difference could presumably be attributed to less surface area and the much  
18 higher pH of Bm (Fig. S3 and Table S1), resulting in weak adsorption and great liming effects. ~~Overall, compared with  
19 previous studies (Ro et al., 2015; Mandal et al., 2016), no significant reductions were found in cumulative NH<sub>3</sub>  
20 volatilizations over the whole observation period when biochar was added to current vegetable soils. In general, freshly  
21 produced biochar typically has very low ability to absorb ammonium (Yao et al., 2012). Over time, biochar surfaces are  
22 oxidized and increase adsorption (Wang et al., 2016). Moreover, the recorded increase in CEC by Cheng et al. (2006)  
23 indicated that biochars that are sufficiently weathered over a period would increase their ability to retain cations such as  
24 NH<sub>4</sub><sup>+</sup>-N. Further, relatively long term experiments are required to elucidate the mechanism and duration of effect.~~

#### 25 4.2. Biochar effects on vegetable yield and *GNrI* across different soil types

26 The application of biochar is usually intended to increase crop yields, and evidence suggests this may be successful  
27 (Schulz et al., 2013; Li et al., 2016). Due to its liming effect, biochar helps to improve the supply of essential macro- and  
28 micronutrients for plant growth (Chan and Xu, 2009; Major et al., 2010). Enhancement of vegetable yield with biochar  
29 amendment occurred in ~~CambisolSD~~ and ~~PhaeozemHLJ soils~~ (Table 3e). ~~Additionally, the effects of Bm and Bw on  
30 vegetable yield was were mixed inconsistent, which probably due to performance of biochars as an amendment is related~~

1 ~~to the wide diversity of physicochemical characteristics of biochar that translates into variable reactions in soil (Novak et~~  
2 ~~al., 2014). First, compared to Bw, more DOC content was in the Bm has a higher DOC content (Table S1), through which~~  
3 ~~more nutrients may be directly introduced to the soil (Rajkovich et al., 2012). In addition, besides their large~~  
4 ~~amount of plant-available nutrients (Hass et al., 2012), manure-biochars produced with manure have been generally~~  
5 ~~considered significant for improving soil fertility by promoting soil structure development (Joseph et al., 2010), with the~~  
6 ~~result that Bm was found superior to Bw in vegetable production enhancement in our case (Table 3e). As biochar effects~~  
7 ~~on vegetable yield were variable, both biochar properties and soil conditions and crop species ought to be taken into~~  
8 ~~account comprehensively before applying biochar to a certain soil condition.~~

9 However, no promotion of yield was observed with biochar amendments in ~~AcrisolHN~~ and ~~AnthrosolSX~~. This  
10 could be attributed to exacerbated soil salinity, which inhibited the uptake of nutrients and water (Ju et al., 2006; Zhou et  
11 al., 2010) and the growth of the soil microorganisms (Setia et al., 2011), leading to unsustainable greenhouse vegetable  
12 production. Compared with other biochar (Jia et al., 2012), the higher amounts of ash in Bw and Bm may contain high  
13 salts causing soil salinity (Hussain et al., 2016). After the addition of the two salt-rich biochars, the EC values of  
14 ~~AcrisolHN~~ and ~~AnthrosolSX~~ vegetable soils increased and reached the limits to tolerance for the leafy vegetables  
15 (Shannon and Grieve, 1998). ~~Additionally, the mixed performance of biochars as an amendment is related to the wide~~  
16 ~~diversity of physicochemical characteristics that translates into variable reactions in soil (Novak et al., 2014). First,~~  
17 ~~compared to Bw, more DOC content was in the Bm (Table S1), through which more nutrients may be directly introduced~~  
18 ~~to the soil (Rajkovich et al., 2012). In addition, besides their large amount of plant available nutrients (Hass et al., 2012),~~  
19 ~~manure biochars have been generally considered significant for improving soil fertility by promoting soil structure~~  
20 ~~development (Joseph et al., 2010), with the result that Bm was found superior to Bw in vegetable production~~  
21 ~~enhancement (Table 3e). As biochar effects on vegetable yield were variable, both biochar properties and soil conditions~~  
22 ~~and crop species ought to be taken into account comprehensively before applying biochar to a certain soil condition.~~

23 Here, we assessed two feedstock-derived biochar effects on GN<sub>r</sub>I in typical cultivated vegetable soils across  
24 mainland China. Overall, biochar amendments reduced GN<sub>r</sub>I over all the soils, with the magnitude largely depending on  
25 soil type. Remarkable reduction in GN<sub>r</sub>I had been detected due to the efficient mitigation induced by biochar in  
26 ~~AnthrosolSX~~ and ~~PhaeozemHLJ~~ (Table 3f). However, despite enhanced vegetable yield, no significant decreases in GN<sub>r</sub>I  
27 were observed in ~~CambisolSD~~, mainly because of the absence of mitigation effects on N<sub>2</sub>O, NO and NH<sub>3</sub> emissions of  
28 biochars (Table 3a, b and c). ~~Additionally, Overall, divergent influences on GNE and yield were determined with different~~  
29 ~~biochars that Bw was superior to Bm in mitigating the GN<sub>r</sub>E while Bm performed better in vegetable yield enhancement~~  
30 ~~(Table 3d and e). Therefore, mitigation efficacy on GN<sub>r</sub>I were not notably different between Bw and Bm amendments~~

1 | across the four soils, largely due to the divergent influences on GNE and yield that Bw was superior to Bm in mitigating  
2 | the GNE while Bm performed better in vegetable yield (Table 3d and e). Furthermore, from our perspective, economic  
3 | effectiveness/feasibility, such as the net ecosystem economic budget, should be considered synchronously in intensive  
4 | vegetable production before large scale biochar applicat

## 1 **5. Conclusion**

2 The study demonstrated that biochar amendments ~~mostly generally~~ reduced N<sub>2</sub>O and NO emissions ~~(except for~~  
3 ~~CambisolSD soil) without influencing and slightly increased~~ the NH<sub>3</sub> emissions, while produced no consensus influences  
4 on yield though those effects were largely both biochar- and soil-specific. Additionally, biochar amendments did decrease  
5 GNrI in intensive vegetable soils across mainland China. Furthermore, Bw was superior to Bm in mitigating the GNrE  
6 whereas the Bm performed better in crop yield throughout all soils. Consequently, both soil type and biochar  
7 characteristics need to be seriously considered before large-scale biochar application under certain regions of intensive  
8 vegetable production.

1 **Acknowledge**

2 [We would like to express our heartfelt gratitude to the anonymous reviewer for the constructive comments that greatly](#)  
3 [improved the manuscript.](#) This work was jointly supported by the National Natural Science Foundation of China  
4 (41471192), Special Fund for Agro-Scientific Research in the Public Interest (201503106) and the Ministry of Science  
5 and Technology (2013BAD11B01).

## 1 **References**

- 2 Ameloot, N., Sleutel, S., Das, K. C., Kanagaratnam, J., and Neve, S. D.: Biochar amendment to soils with contrasting  
3 organic matter level: effects on N mineralization and biological soil properties, *Global Change Biology Bioenergy*, 7,  
4 135–144, 2015.
- 5 Anderson, J. and Domsch, K.: A physiological method for the quantitative measurement of microbial biomass in soils,  
6 *Soil biology and biochemistry*, 10, 215–221, 1978.
- 7 Anenberg, S. C., Schwartz, J., Shindell, D., Amann, M., Faluvegi, G., Klimont, Z., Janssensmaenhout, G., Pozzoli, L.,  
8 Van, D. R., and Vignati, E.: Global Air Quality and Health Co-benefits of Mitigating Near-Term Climate Change  
9 through Methane and Black Carbon Emission Controls, *Environmental Health Perspectives*, 120, 831–839, 2012.
- 10 Avnery, S., Mauzerall, D. L., Liu, J., and Horowitz, L. W.: Global crop yield reductions due to surface ozone exposure: 1.  
11 Year 2000 crop production losses and economic damage, *Atmospheric Environment*, 45, 2284–2296, 2011.
- 12 Behera, S. N., Sharma, M., Aneja, V. P., and Balasubramanian, R.: Ammonia in the atmosphere: a review on emission  
13 sources, atmospheric chemistry and deposition on terrestrial bodies, *Environmental Science and Pollution Research*,  
14 20, 8092–8131, 2013.
- 15 Boyer, E. W., Goodale, C. L., Jaworski, N. A., and Howarth, R. W.: Anthropogenic nitrogen sources and relationships to  
16 riverine nitrogen export in the northeastern USA. In: *The Nitrogen Cycle at Regional to Global Scales*, Springer,  
17 2002.
- 18 Cayuela, M., Van Zwieten, L., Singh, B., Jeffery, S., Roig, A., and Sánchez-Monedero, M.: Biochar's role in mitigating  
19 soil nitrous oxide emissions: A review and meta-analysis, *Agriculture, Ecosystems & Environment*, 191, 5–16, 2014.
- 20 Chan, K. Y. and Xu, Z.: Biochar: nutrient properties and their enhancement, *Biochar for environmental management:*  
21 *science and technology*, 2009. 67–84, 2009.
- 22 ~~Cheng, C. H., Lehmann, J., Thies, J. E., Burton, S. D., and Engelhard, M. H.: Oxidation of black carbon by biotic and  
23 abiotic processes, *Organic Geochemistry*, 37, 1477–1488, 2006.~~
- 24 Ciais, P.: Carbon and other biogeochemical cycles: Final draft underlying scientific technical assessment, IPCC  
25 Secretariat, Geneva, 2013. 2013.
- 26 Clough, T. J. and Condon, L. M.: Biochar and the nitrogen cycle: introduction, *Journal of Environmental Quality*,  
27 39, 1218–1223, 2010.
- 28 Clough, T. J., Bertram, J. E., Ray, J. L., Condon, L. M., O'Callaghan, M., Sherlock, R. R., and Wells, N. S.: Unweathered  
29 Wood Biochar Impact on Nitrous Oxide Emissions from a Bovine-Urine-Amended Pasture Soil, *Soil Science  
30 Society of America Journal*, 74, 852–860, 2010.

- 1 Deng, J., Zhou, Z., Zheng, X., and Li, C.: Modeling impacts of fertilization alternatives on nitrous oxide and nitric oxide  
2 emissions from conventional vegetable fields in southeastern China, *Atmospheric Environment*, 81, 642–650, 2013.
- 3 Diao, T., Xie, L., Guo, L., Yan, H., Lin, M., Zhang, H., Lin, J., and Lin, E.: Measurements of N<sub>2</sub>O emissions from  
4 different vegetable fields on the North China Plain, *Atmospheric Environment*, 72, 70–76, 2013.
- 5 FAO, IIASA, ISRIC, and ISSCAS: Harmonized World Soil Database Version 1.2, 2012. 2012.
- 6 Field, J. L., Keske, C. M. H., Birch, G. L., Defoort, M. W., and Cotrufo, M. F.: Distributed biochar and bioenergy  
7 coproduction: a regionally specific case study of environmental benefits and economic impacts, *Global Change  
8 Biology Bioenergy*, 5, 177–191, 2013.
- 9 Food and Agriculture Organization (FAO) (2015) FAOSTAT (Food and Agriculture Organization Statistical Data)  
10 Statistical Yearbook Vol. 4. Available at: <http://faostat.fao.org> (accessed 12 August 2015)
- 11 Harrison, R. and Webb, J.: A review of the effect of N fertilizer type on gaseous emissions, *Advances in Agronomy*, 73,  
12 65–108, 2001.
- 13 Hass, A., Gonzalez, J. M., Lima, I. M., Godwin, H. W., Halvorson, J. J., and Boyer, D. G.: Chicken manure biochar as  
14 liming and nutrient source for acid Appalachian soil, *Journal of Environmental Quality*, 41, 1096–1106, 2012.
- 15 Hu, H. W., Macdonald, C. A., Trivedi, P., Anderson, I. C., Zheng, Y., Holmes, B., Bodrossy, L., Wang, J. T., He, J. Z., and  
16 Singh, B. K.: Effects of climate warming and elevated CO<sub>2</sub> on autotrophic nitrification and nitrifiers in dryland  
17 ecosystems, *Soil Biology & Biochemistry*, 92, 1–15, 2016.
- 18 Hussain, M., Farooq, M., Nawaz, A., Al-Sadi, A. M., Solaiman, Z. M., Alghamdi, S. S., Ammara, U., Yong, S. O., and  
19 Siddique, K. H. M.: Biochar for crop production: potential benefits and risks, *Journal of Soils & Sediments*, 2016.  
20 1–32, 2016.
- 21 [IPCC: Climate Change 2013: The Physical Science Basis: working group I contribution to the Fifth Assessment Report  
22 of the Intergovernmental Panel on Climate Change. Cambridge University Press, Stockholm, 2013.](#)
- 23 ~~[IPCC, 2013. The Physical Science Basis: Working Group I Contribution to the Fifth Assessment Report of the  
24 Intergovernmental Panel on Climate Change. New York: Cambridge University Press 1, 535–531.](#)~~
- 25 Islam, A., Chen, D., White, R. E., and Weatherley, A. J.: Chemical decomposition and fixation of nitrite in acidic pasture  
26 soils and implications for measurement of nitrification, *Soil Biology & Biochemistry*, 40, 262–265, 2008.
- 27 Jia, J., Li, B., Chen, Z., Xie, Z., and Xiong, Z.: Effects of biochar application on vegetable production and emissions of  
28 N<sub>2</sub>O and CH<sub>4</sub>, *Soil Science and Plant Nutrition*, 58, 503–509, 2012.
- 29 Joseph, S. D., Camparbestain, M., Lin, Y., Munroe, P., Chia, C. H., Hook, J., Van, Z. L., Kimber, S., Cowie, A., and  
30 Singh, B. P.: An investigation into the reactions of biochar in soil, *Australian Journal of Soil Research*, 48, 501–515,



1        2010.

2    Ju, X. T., Kou, C. L., Zhang, F. S., and Christie, P.: Nitrogen balance and groundwater nitrate contamination: comparison  
3        among three intensive cropping systems on the North China Plain, *Environmental Pollution*, 143, 117–125, 2006.

4    Kim, J. Y., Song, C. H., Ghim, Y. S., Won, J. G., Yoon, S. C., Carmichael, G. R., and Woo, J. H.: An investigation on NH<sub>3</sub>  
5        emissions and particulate NH<sub>4</sub><sup>+</sup>–NO<sub>3</sub><sup>–</sup> formation in East Asia, *Atmospheric Environment*, 40, 2139–2150, 2006.

6    Kurola, J., Salkinoja-Salonen, M., Aarnio, T., Hultman, J., and Romantschuk, M.: Activity, diversity and population size  
7        of ammonia-oxidising bacteria in oil-contaminated landfarming soil, *FEMS Microbiology Letters*, 250, 33–38,  
8        2005.

9    Langridge, J. M., Lack, D., Brock, C. A., Bahreini, R., Middlebrook, A. M., Neuman, J. A., Nowak, J. B., Perring, A. E.,  
10       Schwarz, J. P., and Spackman, J. R.: Evolution of aerosol properties impacting visibility and direct climate forcing  
11       in an ammonia-rich urban environment, *Journal of Geophysical Research Atmospheres*, 117, 2240–2260, 2012.

12   Li, B., Bi, Z., and Xiong, Z.: Dynamic responses of nitrous oxide emission and nitrogen use efficiency to nitrogen and  
13       biochar amendment in an intensified vegetable field in southeastern China, *Global Change Biology Bioenergy*, 2016.  
14       2016.

15   Li, B., Fan, C. H., Xiong, Z. Q., Li, Q. L., and Zhang, M.: The combined effects of nitrification inhibitor and biochar  
16       incorporation on yield-scaled N<sub>2</sub>O emissions from an intensively managed vegetable field in southeastern China,  
17       *Biogeosciences*, 12, 15185–15214, 2015a.

18   Li, B., Fan, C. H., Zhang, H., Chen, Z. Z., Sun, L. Y., and Xiong, Z. Q.: Combined effects of nitrogen fertilization and  
19       biochar on the net global warming potential, greenhouse gas intensity and net ecosystem economic budget in  
20       intensive vegetable agriculture in southeastern China, *Atmospheric Environment*, 100, 10–19, 2015b.

21   Liu, X., Zhang, A., Ji, C., Joseph, S., Bian, R., Li, L., Pan, G., and Paz-Ferreiro, J.: Biochar’s effect on crop productivity  
22       and the dependence on experimental conditions—a meta-analysis of literature data, *Plant and Soil*, 373, 583–594,  
23       2013.

24   Lu, R.: *Methods of soil and agro-chemical analysis*, China Agricultural Science and Technology Press, Beijing, 2000.  
25       127–332, 2000. (in Chinese)\_

26   [Ma, L., Shan, J., Yan, X., 2015. Nitrite behavior accounts for the nitrous oxide peaks following fertilization in a  
27       fluvo-aquic soil. \*Biology and Fertility of Soils\* 51, 563-572.](#)

28   Major, J., Lehmann, J., Rondon, M., and Goodale, C.: Fate of soil-applied black carbon: downward migration, leaching  
29       and soil respiration, *Global Change Biology*, 16, 1366–1379, 2010.

30

1 [Mandal, S., Thangarajan, R., Bolan, N. S., Sarkar, B., Khan, N., Ok, Y. S., and Naidu, R.: Biochar induced concomitant](#)  
2 [decrease in ammonia volatilization and increase in nitrogen use efficiency by wheat, Chemosphere, 142, 120–127,](#)  
3 [2016.](#)

4 Mei, B. L., Zheng, X. H., Xie, B. H., Dong, H. B., Zhou, Z. X., Rui, W., Jia, D., Feng, C., Tong, H. J., and Zhu, J. G.:  
5 Nitric oxide emissions from conventional vegetable fields in southeastern China, *Atmospheric Environment*, 43,  
6 2762–2769, 2009.

7 Misselbrook, T. H., Weerden, T. J. V. D., Pain, B. F., Jarvis, S. C., Chambers, B. J., Smith, K. A., Phillips, V. R., and  
8 Demmers, T. G. M.: Ammonia emission factors for UK agriculture, *Atmospheric Environment*, 34, 871–880(810),  
9 2000.

10 Mukherjee, A. and Zimmerman, A. R.: Organic carbon and nutrient release from a range of laboratory-produced biochars  
11 and biochar–soil mixtures, *Geoderma*, s 193–194, 122–130, 2013.

12 Nelissen, V.: Effect of different biochar and fertilizer types on N<sub>2</sub>O and NO emissions, *Soil Biology & Biochemistry*, 70,  
13 244–255, 2014.

14 Novak, J. M., Spokas, K. A., Cantrell, K. B., Ro, K. S., Watts, D. W., Glaz, B., Busscher, W. J., and Hunt, P. G.: Effects  
15 of biochars and hydrochars produced from lignocellulosic and animal manure on fertility of a Mollisol and Entisol,  
16 *Soil Use and Management*, 30, 175–181, 2014.

17 Obia, A., Cornelissen, G., Mulder, J., and Dürsch, P.: Effect of Soil pH Increase by Biochar on NO, N<sub>2</sub>O and N<sub>2</sub>  
18 Production during Denitrification in Acid Soils, *Plos One*, 10, 359–367, 2015.

19 Pacholski, A., Cai, G. X., Fan, X. H., Ding, H., Chen, D., Nieder, R., and Roelcke, M.: Comparison of different methods  
20 for the measurement of ammonia volatilization after urea application in Henan Province, China, *Journal of Plant*  
21 *Nutrition and Soil Science*, 171, 361–369, 2008.

22 Pinder, R. W., Adams, P. J., and Pandis, S. N.: Ammonia emission controls as a cost-effective strategy for reducing  
23 atmospheric particulate matter in the Eastern United States, *Environmental Science & Technology*, 41, 380–386,  
24 2007.

25 Powelson, D. S., Addiscott, T. M., Benjamin, N., Cassman, K. G., de Kok, T. M., Van, G. H., L'Hirondel, J. L., Avery, A.  
26 A., and Van, K. C.: When does nitrate become a risk for humans?, *Journal of Environmental Quality*, 37, 291–295,  
27 2008.

28 Rajkovich, S., Enders, A., Hanley, K., Hyland, C., Zimmerman, A. R., and Lehmann, J.: Corn growth and nitrogen  
29 nutrition after additions of biochars with varying properties to a temperate soil, *Biology & Fertility of Soils*, 48,  
30 271–284, 2012.

- 1 Ravishankara, A. R., Daniel, J. S., and Portmann, R. W.: Nitrous oxide (N<sub>2</sub>O): the dominant ozone-depleting substance  
2 emitted in the 21st century, *Science*, 326, 123–125, 2009.
- 3 ~~Ro, K. S., Lima, I. M., Reddy, G. B., Jackson, M. A., and Gao, B.: Removing Gaseous NH<sub>3</sub> Using Biochar as an  
4 Adsorbent, *Agriculture*, 5, 991–1002, 2015.~~
- 5 Saarnio, S., Heimonen, K., and Kettunen, R.: Biochar addition indirectly affects N<sub>2</sub>O emissions via soil moisture and  
6 plant N uptake, *Soil Biology & Biochemistry*, 58, 99–106, 2013.
- 7 Schouten, S., Groenigen, J. W. V., Oenema, O., and Cayuela, M. L.: Bioenergy from cattle manure? Implications of  
8 anaerobic digestion and subsequent pyrolysis for carbon and nitrogen dynamics in soil, *Global Change Biology*  
9 *Bioenergy*, 4, 751–760, 2012.
- 10 Schulz, H., Dunst, G., and Glaser, B.: Positive effects of composted biochar on plant growth and soil fertility, *Agronomy*  
11 *for Sustainable Development*, 33, 817–827, 2013.
- 12 Setia, R., Marschner, P., Baldock, J., Chittleborough, D., and Verma, V.: Relationships between carbon dioxide emission  
13 and soil properties in salt-affected landscapes, *Soil Biology & Biochemistry*, 43, 667–674, 2011.
- 14 Shannon, M. C. and Grieve, C. M.: Tolerance of vegetable crops to salinity, *Scientia Horticulturae*, 78, 5–38, 1998.
- 15 Smith, M. S. and Tiedje, J. M.: Phases of denitrification following oxygen depletion in soil, *Soil Biology & Biochemistry*,  
16 11, 261–267, 1979.
- 17 Smith, P.: Soil carbon sequestration and biochar as negative emission technologies, *Global Change Biology*, 51, 574–575,  
18 2016.
- 19 Sohi, S. P.: Agriculture. Carbon storage with benefits, *Science*, 338, 1034–1035, 2012.
- 20 Sororzano, L.: Determination of ammonia in natural waters by the phenylhypochlorite method, *Limnol. Oceanogr*, 14,  
21 799–801, 1969.
- 22 Spokas, K. A. and Reicosky, D. C.: Impacts of sixteen different biochars on soil greenhouse gas production, *Ann.*  
23 *Environ. Sci*, 3, 4, 2009.
- 24 Stavi, I. and Lal, R.: Agroforestry and biochar to offset climate change: a review, *Agronomy for Sustainable*  
25 *Development*, 33, 81–96, 2013.
- 26 Sun, L., Li, L., Chen, Z., Wang, J., and Xiong, Z.: Combined effects of nitrogen deposition and biochar application on  
27 emissions of N<sub>2</sub>O, CO<sub>2</sub> and NH<sub>3</sub> from agricultural and forest soils, *Soil science and plant nutrition*, 60, 254–265,  
28 2014.
- 29 Ussiri, D. and Lal, R.: *The Role of Nitrous Oxide on Climate Change*, Springer Netherlands, 2013.
- 30 ~~Wang, B., Lehmann, J., Hanley, K., Hestrin, R., and Enders, A.: Ammonium retention by oxidized biochars produced at~~

- 1 | [different pyrolysis temperatures and residence times, Res Advances, 6, 41907–41913, 2016.](#)
- 2 | Wang, J., Chen, Z., Ma, Y., Sun, L., Xiong, Z., Huang, Q., and Sheng, Q.: Methane and nitrous oxide emissions as  
3 | affected by organic–inorganic mixed fertilizer from a rice paddy in southeast China, *Journal of Soils and Sediments*,  
4 | 13, 1408–1417, 2013.
- 5 | Wang, J., Chen, Z., Xiong, Z., Chen, C., Xu, X., Zhou, Q., and Kuzyakov, Y.: Effects of biochar amendment on  
6 | greenhouse gas emissions, net ecosystem carbon budget and properties of an acidic soil under intensive vegetable  
7 | production, *Soil Use and Management*, 31, 375–383, 2015a.
- 8 | Wang, S., Nan, J., Shi, C., Fu, Q., Gao, S., Wang, D., Cui, H., Saizlopez, A., and Zhou, B.: Atmospheric ammonia and its  
9 | impacts on regional air quality over the megacity of Shanghai, China, *Scientific Reports*, 5, 2015b.
- 10 | [Wrage, N., Velthof, G., Van Beusichem, M., Oenema, O., 2001. Role of nitrifier denitrification in the production of  
11 | nitrous oxide. \*Soil Biology and Biochemistry\* 33, 1723-1732.](#)
- 12 | Xiong, Z., Xie, Y., Xing, G., Zhu, Z., and Butenhoff, C.: Measurements of nitrous oxide emissions from vegetable  
13 | production in China, *Atmospheric Environment*, 40, 2225–2234, 2006.
- 14 | [Yao, Y., Gao, B., Zhang, M., Inyang, M., and Zimmerman, A. R.: Effect of biochar amendment on sorption and leaching  
15 | of nitrate, ammonium, and phosphate in a sandy soil, \*Chemosphere\*, 89, 1467–1471, 2012.](#)
- 16 | Yao, Z., Zheng, X., Xie, B., Mei, B., Wang, R., Klaus, B. B., Zhu, J., and Yin, R.: Tillage and crop residue management  
17 | significantly affects N-trace gas emissions during the non-rice season of a subtropical rice-wheat rotation, *Soil  
18 | Biology & Biochemistry*, 41, 2131–2140, 2009.
- 19 | Zhang, A., Cui, L., Pan, G., Li, L., Hussain, Q., Zhang, X., Zheng, J., and Crowley, D.: Effect of biochar amendment on  
20 | yield and methane and nitrous oxide emissions from a rice paddy from Tai Lake plain, China, *Agriculture  
21 | Ecosystems & Environment*, 139, 469–475, 2010.
- 22 | Zhang, F., Chen, X., and Vitousek, P.: Chinese agriculture: An experiment for the world, *Nature*, 497, 33-35, 2013.
- 23 | Zhang, M., Fan, C. H., Li, Q. L., Li, B., Zhu, Y. Y., and Xiong, Z. Q.: A 2-yr field assessment of the effects of chemical  
24 | and biological nitrification inhibitors on nitrous oxide emissions and nitrogen use efficiency in an intensively  
25 | managed vegetable cropping system, *Agriculture Ecosystems & Environment*, 201, 43–50, 2015.
- 26 | Zhang, Y., Luan, S., Chen, L., and Shao, M.: Estimating the volatilization of ammonia from synthetic nitrogenous  
27 | fertilizers used in China, *Journal of Environmental Management*, 92, 480–493, 2011.
- 28 | Zhao, L. M., Wu, L. H., Dong, C. J., and Li, Y. S.: Rice yield, nitrogen utilization and ammonia volatilization as  
29 | influenced by modified rice cultivation at varying nitrogen rates, *Agricultural Sciences*, 01, 10–16, 2010.
- 30 | Zhao, X., Wang, J., Wang, S., and Xing, G.: Successive straw biochar application as a strategy to sequester carbon and

带格式的: 字体颜色: 自动设置

带格式的: 段落间距段前: 0 磅, 行距:  
1.5 倍行距

- 1 improve fertility: A pot experiment with two rice/wheat rotations in paddy soil, *Plant and Soil*, 378, 279–294, 2014.
- 2 Zheng, X., Mei, B., Wang, Y., Xie, B., Wang, Y., Dong, H., Xu, H., Chen, G., Cai, Z., and Yue, J.: Quantification of N<sub>2</sub>O
- 3 fluxes from soil–plant systems may be biased by the applied gas chromatograph methodology, *Plant and Soil*, 311,
- 4 211–234, 2008.
- 5 Zhou, J. B., Chen, Z. J., Liu, X. J., Zhai, B. N., and Powelson, D. S.: Nitrate accumulation in soil profiles under
- 6 seasonally open ‘sunlight greenhouses’ in northwest China and potential for leaching loss during summer
- 7 fallow, *Soil Use and Management*, 26, 332–339, 2010.
- 8 [Zhu, T., Zhang, J., Cai, Z., 2011. The contribution of nitrogen transformation processes to total N<sub>2</sub>O emissions from](#)
- 9 [soils used for intensive vegetable cultivation. \*Plant and Soil\* 343, 313-327.](#)

带格式的: 字体: 五号, 字体颜色: 自动设置, 检查拼写和语法

带格式的: 缩进: 左侧: 0 厘米, 悬挂缩进: 2 字符

1 **Table legends**

2 **Table 1**

3 Soil organic carbon (SOC), soil total nitrogen (TN), soil pH, electric conductivity (EC) and microbial biomass carbon  
 4 (MBC) as affected by different treatments across the four vegetable soils.

| Soil               | Treatment | SOC (g kg <sup>-1</sup> ) | TN (g kg <sup>-1</sup> ) | pH         | EC (ds m <sup>-1</sup> ) | MBC (mg kg <sup>-1</sup> ) |
|--------------------|-----------|---------------------------|--------------------------|------------|--------------------------|----------------------------|
| <u>AcrisolHN</u>   | N         | 8.0±0.8c                  | 1.37±0.12b               | 4.37±0.04c | 1.76±0.21b               | 1353±119a                  |
|                    | N+Bw      | 15.6±0.5b                 | 1.47±0.07b               | 4.64±0.04b | 2.43±0.31a               | 1173±49b                   |
|                    | N+Bm      | 18.8±0.6a                 | 1.64±0.04a               | 5.01±0.03a | 2.00±0.32ab              | 1234±50ab                  |
| <u>AnthrosolSX</u> | N         | 9.7±0.7c                  | 1.55±0.04b               | 7.53±0.02b | 1.74±0.27b               | 490±9a                     |
|                    | N+Bw      | 15.6±0.8b                 | 1.62±0.06b               | 7.61±0.05a | 2.25±0.22a               | 495±16a                    |
|                    | N+Bm      | 17.5±1.1a                 | 1.79±0.03a               | 7.63±0.01a | 1.96±0.06ab              | 504±18a                    |
| <u>CambisolSD</u>  | N         | 7.9±0.1b                  | 1.13±0.04b               | 7.70±0.08a | 0.85±0.03b               | 535±13b                    |
|                    | N+Bw      | 14.2±0.6a                 | 1.20±0.04b               | 7.66±0.03a | 0.92±0.04a               | 554±10ab                   |
|                    | N+Bm      | 15.5±1.4a                 | 1.37±0.06a               | 7.71±0.03a | 0.87±0.02ab              | 573±12a                    |
| <u>PhaeozemHLJ</u> | N         | 29.9±0.5b                 | 2.19±0.04b               | 6.91±0.05a | 0.83±0.03b               | 921±44b                    |
|                    | N+Bw      | 36.0±1.5a                 | 2.20±0.03b               | 6.92±0.06a | 0.95±0.03a               | 988±56b                    |
|                    | N+Bm      | 38.1±1.8a                 | 2.41±0.01a               | 6.94±0.04a | 0.92±0.06a               | 1242±196a                  |
| ANOVA results      |           |                           |                          |            |                          |                            |
| Biochar            |           | ***                       | ***                      | ***        | ***                      | *                          |
| Soil               |           | ***                       | ***                      | ***        | ***                      | ***                        |
| Biochar×Soil       |           | *                         | n.s.                     | ***        | n.s.                     | **                         |

5 Data shown are means ± standard deviations of three replicates. See Fig. 1 for treatments codes. Different letters within  
 6 the same column indicate significant differences among treatments within the same soil at  $p < 0.05$  level.  
 7 \*\*\*Significant at  $p < 0.001$ ; \*\*significant at  $p < 0.01$ ; \*significant at  $p < 0.05$ ; n.s. not significant.

带格式表格

带格式表格

带格式表格

带格式表格

1 **Table 2**

2 Two-way ANOVA and mean effects of biochar (Bc) and soil (S) types on cumulative ~~gaseous nitrogen~~ (N<sub>2</sub>O, NO and NH<sub>3</sub>) emissions, gaseous reactive nitrogen emission  
 3 (GN<sub>r</sub>E), vegetable yield and gaseous reactive nitrogen intensity (GN<sub>r</sub>I) during the entire sampling period.

| Factors                     | DF | N <sub>2</sub> O emission |       |     | NO emission |       |     | NH <sub>3</sub> emission               |     |      | GN <sub>r</sub> E |       |     | Vegetable yield |       |      | GN <sub>r</sub> I |       |      |
|-----------------------------|----|---------------------------|-------|-----|-------------|-------|-----|----------------------------------------|-----|------|-------------------|-------|-----|-----------------|-------|------|-------------------|-------|------|
|                             |    | SS                        | F     | P   | SS          | F     | P   | SS                                     | F   | P    | SS                | F     | P   | SS              | F     | P    | SS                | F     | P    |
| Bc                          | 2  | 271.9                     | 65.1  | *** | 46.4        | 174.7 | *** | 0.5                                    | 0.8 | n.s. | 380.5             | 86.4  | *** | 76.2            | 3.2   | n.s. | 0.1               | 7.9   | **   |
| S                           | 3  | 1429.9                    | 228.1 | *** | 152.2       | 382.1 | *** | 4.1                                    | 3.8 | *    | 2322.6            | 351.5 | *** | 4316.9          | 123.3 | ***  | 2.3               | 110.3 | ***  |
| Bc×S                        | 6  | 179.3                     | 14.3  | *** | 33.4        | 41.9  | *** | 1.4                                    | 0.7 | n.s. | 234.5             | 17.7  | *** | 230.4           | 3.3   | *    | 0.1               | 1.6   | n.s. |
| Model                       | 11 | 4009.7                    | 174.5 | *** | 225.3       | 154.3 | *** | 29.1                                   | 7.5 | ***  | 5290              | 218.3 | *** | 15962.0         | 124.4 | ***  | 5.8               | 77.0  | ***  |
| Error                       | 24 | 50.1                      |       |     | 3.2         |       |     | 8.5                                    |     |      | 52.9              |       |     | 280.0           |       |      | 0.2               |       |      |
| biochar effect (n = 12)     |    |                           |       |     |             |       |     |                                        |     |      |                   |       |     |                 |       |      |                   |       |      |
| N mean                      |    | 12.01±1.44a               |       |     | 2.86±0.24a  |       |     | <del>5.925.63</del> ±0.24 <b>72a</b>   |     |      | 20.50±1.60a       |       |     | 43.81±5.82a     |       |      | 0.57±0.05a        |       |      |
| N+Bw mean                   |    | 7.01±0.58b                |       |     | 1.55±0.14b  |       |     | <del>6.6.3765</del> ±0.27 <b>1.02a</b> |     |      | 14.94±0.84b       |       |     | 43.53±6.31a     |       |      | 0.45±0.04b        |       |      |
| N+Bm mean                   |    | 10.37±0.56a               |       |     | 1.55±0.10b  |       |     | <del>7.046.68</del> ±0.25 <b>1.10a</b> |     |      | 18.60±0.65a       |       |     | 49.53±6.91a     |       |      | 0.49±0.03ab       |       |      |
| Soil effect (n = 9)         |    |                           |       |     |             |       |     |                                        |     |      |                   |       |     |                 |       |      |                   |       |      |
| <del>AcrisolHN</del> mean   |    | 27.20±1.85a               |       |     | 5.80±0.50a  |       |     | 5.31±0.16c                             |     |      | 38.04±1.90a       |       |     | 33.06±1.65c     |       |      | 1.15±0.11a        |       |      |
| <del>AnthrosolSX</del> mean |    | 4.89±0.45b                |       |     | 1.08±0.13b  |       |     | 12.69±0.46a                            |     |      | 12.69±0.46b       |       |     | 25.05±1.11d     |       |      | 0.51±0.01b        |       |      |
| <del>CambisolSD</del> mean  |    | 2.25±0.26c                |       |     | 0.25±0.09c  |       |     | 9.51±0.55b                             |     |      | 9.51±0.55c        |       |     | 44.88±0.49b     |       |      | 0.21±0.01c        |       |      |
| <del>PhaeozemHLJ</del> mean |    | 4.48±0.68b                |       |     | 0.81±0.04b  |       |     | 11.79±0.71a                            |     |      | 11.79±0.71b       |       |     | 79.50±2.41a     |       |      | 0.15±0.01c        |       |      |

4 SS: the sum of squares.

5 F value: the ratio of mean squares of two independents samples.

6 P value: the index of differences between the control group and the experimental group. \*, \*\* and \*\*\* indicate significance at  $p < 0.05$ ,  $p < 0.01$  and  $p < 0.001$ , respectively.

7 n.s.: not significant.

8 Data shown are means ± standard deviations of the nine replicates. See Fig. 1 for treatments codes. Different letters within the same column indicate significant differences  
 9 among treatments at  $p < 0.05$  level.

1 **Table 3**

2 Cumulative gaseous nitrogen (N<sub>2</sub>O, NO and NH<sub>3</sub>) emissions, gaseous reactive nitrogen emission (GN<sub>r</sub>E), vegetable yield  
 3 and gaseous reactive nitrogen intensity (GN<sub>r</sub>I) under the different treatments across the four soils.

| Treatments                                                         | <u>AcrisolHN</u> | <u>AnthrosolSX</u> | <u>CambisolSD</u> | <u>PhaeozemHLJ</u> |
|--------------------------------------------------------------------|------------------|--------------------|-------------------|--------------------|
| (a) Cumulative N <sub>2</sub> O emissions (kg N ha <sup>-1</sup> ) |                  |                    |                   |                    |
| N                                                                  | 30.59±3.15a      | 7.83±0.60a         | 2.52±0.37a        | 7.10±1.91a         |
| N+Bw                                                               | 19.45±2.43b      | 3.20±0.28b         | 1.97±0.21a        | 3.45±0.86b         |
| N+Bm                                                               | 31.56±1.35a      | 3.63±0.62b         | 2.26±0.58a        | 4.01±0.68b         |
| (b) Cumulative NO emissions (kg N ha <sup>-1</sup> )               |                  |                    |                   |                    |
| N                                                                  | 8.99±1.01a       | 1.27±0.15a         | 0.20±0.08a        | 0.97±0.11a         |
| N+Bw                                                               | 4.54±0.60b       | 0.80±0.13b         | 0.33±0.19a        | 0.52±0.03b         |
| N+Bm                                                               | 3.87±0.30b       | 1.16±0.17a         | 0.21±0.10a        | 0.94±0.03a         |
| (c) Cumulative NH <sub>3</sub> emissions (kg N ha <sup>-1</sup> )  |                  |                    |                   |                    |
| N                                                                  | 4.72±0.27a       | 5.79±0.54b         | 6.34±0.51a        | 5.67±0.42a         |
| N+Bw                                                               | 5.09±0.38a       | 6.83±0.74ab        | 7.35±0.75a        | 6.24±0.49a         |
| N+Bm                                                               | 5.32±0.42a       | 7.57±0.57a         | 7.37±1.11a        | 6.48±0.43a         |
| (d) GN <sub>r</sub> E (kg N ha <sup>-1</sup> )                     |                  |                    |                   |                    |
| N                                                                  | 44.30±3.13a      | 14.89±1.33a        | 9.06±0.80a        | 13.74±1.67a        |
| N+Bw                                                               | 29.08±2.21b      | 10.82±1.14b        | 9.64±0.88a        | 10.21±0.92b        |
| N+Bm                                                               | 40.76±1.66a      | 12.36±0.74b        | 9.84±0.49a        | 11.42±0.27b        |
| (e) Vegetable yield (t ha <sup>-1</sup> )                          |                  |                    |                   |                    |
| N                                                                  | 35.20±2.52a      | 25.29±3.90a        | 39.09±2.03b       | 75.65±5.84b        |
| N+Bw                                                               | 29.05±2.35b      | 23.57±1.74a        | 44.53±3.74b       | 76.95±4.04ab       |
| N+Bm                                                               | 34.93±2.87a      | 26.30±2.63a        | 51.00±3.18a       | 85.89±3.29a        |
| (f) GN <sub>r</sub> I (kg N t <sup>-1</sup> yield)                 |                  |                    |                   |                    |
| N                                                                  | 1.27±0.18a       | 0.59±0.08a         | 0.23±0.02a        | 0.18±0.04a         |
| N+Bw                                                               | 1.01±0.12a       | 0.46±0.05b         | 0.22±0.04a        | 0.13±0.02b         |
| N+Bm                                                               | 1.17±0.15a       | 0.47±0.04b         | 0.19±0.01a        | 0.13±0.01b         |

4 Data shown are means ± standard deviations of the three replicates. See Fig. 1 for treatments codes. Different letters  
 5 within the same column indicate significant differences among treatments within the same soil at  $p < 0.05$  level.

带格式表格

带格式表格

带格式表格

带格式表格

带格式表格

带格式表格



1 **Table 4**

2 The correlations between N<sub>2</sub>O or NO emission and PNR or DEA in each soil.

| Item             | <u>AcrisolHN</u> |       | <u>AnthrosolSX</u> |       | <u>CambisolSD</u> |      | <u>PhaeozemHLJ</u> |       |
|------------------|------------------|-------|--------------------|-------|-------------------|------|--------------------|-------|
|                  | PNR              | DEA   | PNR                | DEA   | PNR               | DEA  | PNR                | DEA   |
| N <sub>2</sub> O | 0.75*            | 0.66  | 0.49               | 0.76* | -0.10             | 0.16 | -0.82**            | 0.70* |
| NO               | 0.62             | -0.29 | 0.79*              | 0.69* | -0.54             | 0.01 | -0.63              | 0.22  |

3 Asterisks indicated 0.05 level significances (\* $p < 0.05$ ) and 0.01 level significances (\*\* $p < 0.01$ ), n = 9.

带格式表格

1 **Figure legends**

2 **Fig. 1** Potential nitrification rate (PNR) and Denitrification enzyme activity (DEA) under different treatments in  
3 AcrisolHN, AnthrosolSX, CambisolSD and PhaeozemHLJ soils. The three treatments with each soil were urea without  
4 biochar (N), urea with wheat straw biochar (N+Bw) and urea with swine manure biochar (N+Bm). Bars indicate standard  
5 deviation (mean + SD, n = 3). Different letters above the bars indicate significant differences among the different  
6 treatments within the same soil, at  $p < 0.05$ .

7 **Fig. 2** Temporal dynamics of soil  $N_2O$  ( $\mu\text{g N m}^{-2} \text{h}^{-1} \pm \text{SD}$ , n = 3) fluxes under different treatments in AcrisolHN (a),  
8 AnthrosolSX (b), CambisolSD (c) and PhaeozemHLJ (d) vegetable soils with five consecutive vegetable crops. The solid  
9 arrows indicate fertilization. See Fig. 1 for treatments codes.

10 **Fig. 3** Temporal dynamics of soil NO ( $\mu\text{g N m}^{-2} \text{h}^{-1} \pm \text{SD}$ , n = 3) fluxes under different treatments in AcrisolHN (a),  
11 AnthrosolSX (b), CambisolSD (c) and Phaeozem HLJ (d) vegetable soils with five consecutive vegetable crops. The  
12 solid arrows indicate fertilization. See Fig. 1 for treatments codes.

13 **Fig. 4** Cumulative ammonia ( $\text{NH}_3$ ) emissions from the AcrisolHN (a), AnthrosolSX (b), CambisolSD (c) and  
14 PhaeozemHLJ (d) soils during the four nitrogen fertilization events F: every N fertilization event. The bars indicate the  
15 standard deviation of the mean ( $\text{kg N ha}^{-1} \pm \text{SD}$ , n = 3) of each treatment for the sum of the four N fertilization events.  
16 See Fig. 1 for treatments codes. Different letters above the bars indicate significant differences among the different  
17 treatments for each soil, at  $p < \underline{\hspace{1cm}} 0.05$ .

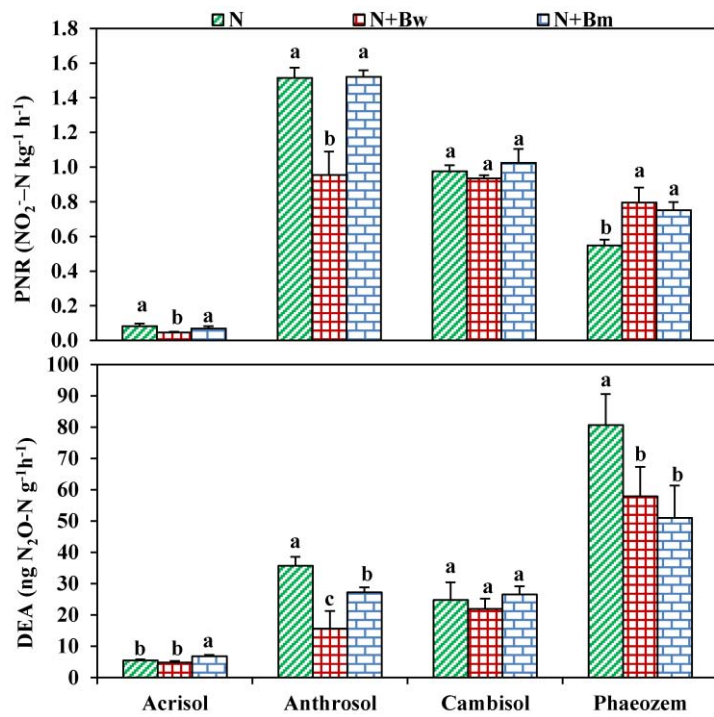

1

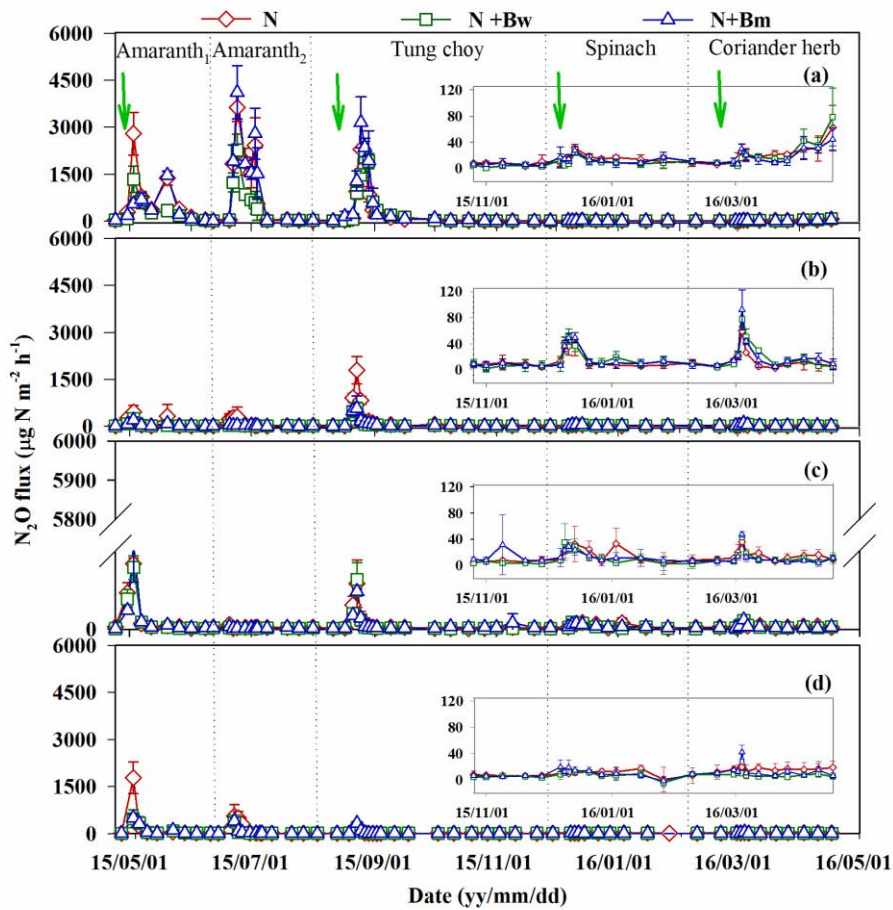

1

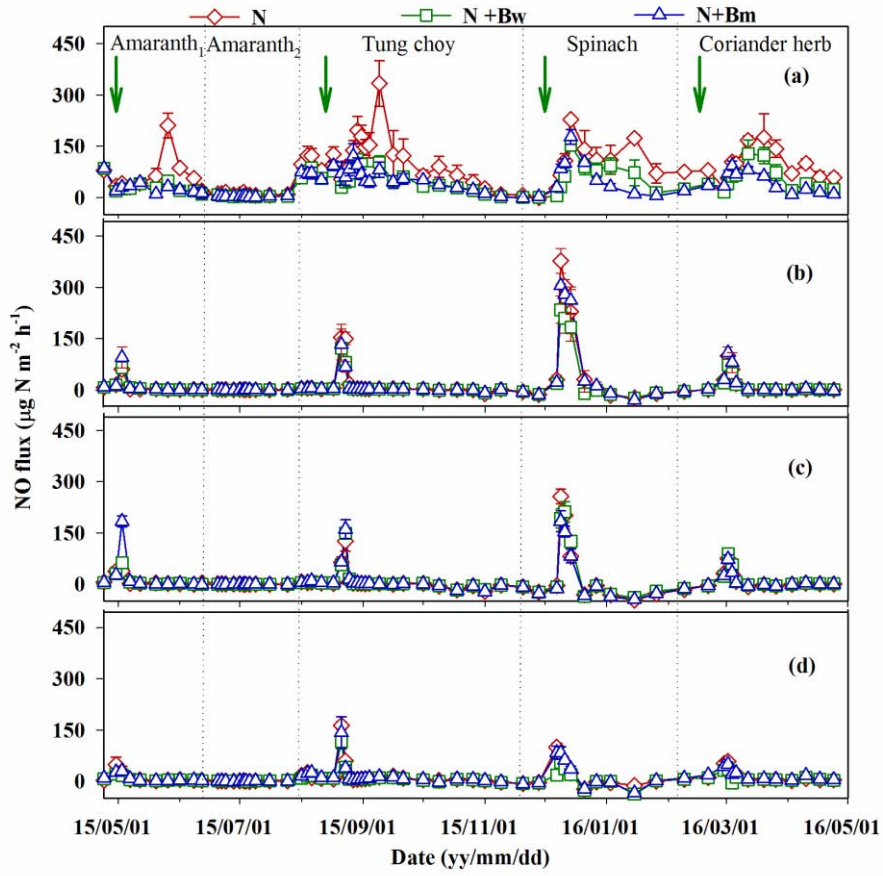

1

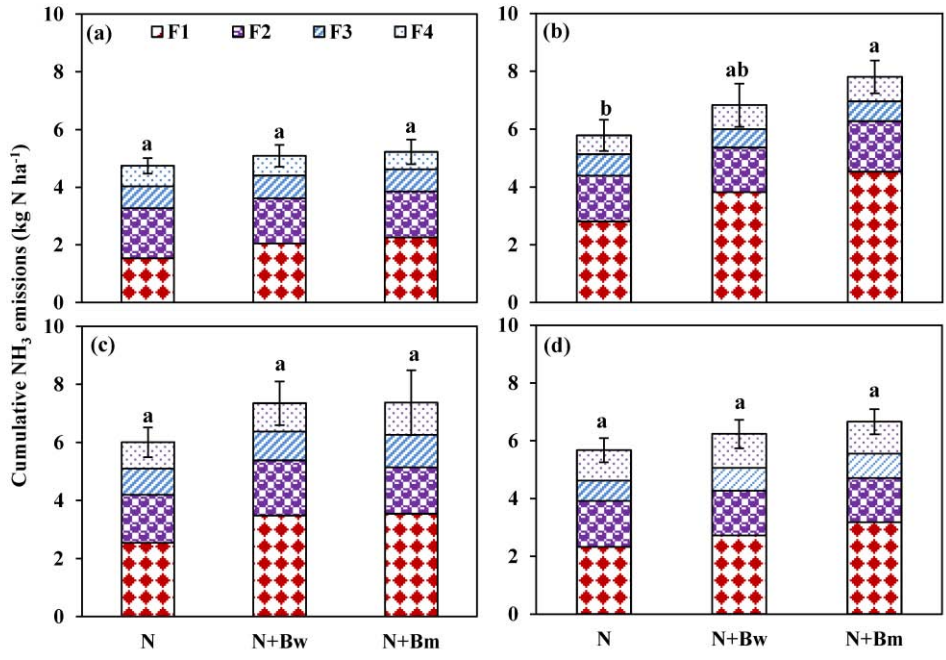

1
